# Supplementary material
Source: publisher site journal article supplement (https://www.spandidos-publications.com/1665/downloadSupplementary)
Supplement: Supplementary file 1 [file downloadSupplementary]

## Sheet: Upstream_Analysis
Table SV. Upstream analysis by IPA.
Upstream Regulator	Molecule Type	Predicted Activation State	Activation Z-Score	P-value of Overlap	Target Molecules in Dataset	Mechanistic Network
SCAP	OTHER	Inhibited	-4.617	2.12x10-18	ACSS2,CYP51A1,DHCR7,ELOVL6,FASN,FDFT1,FDPS,HMGCR,IDI1,INSIG1,LDLR,LSS,MSMO1,MVD,MVK,NSDHL,PMVK,SC5D,SCD,SQLE,TM7SF2,TMEM97	199
SREBF2	TRANSCRIPTION REGULATOR	Inhibited	-4.31	2.55x10-18	ACSS2,CDKN1A,CYP51A1,DHCR7,ELOVL6,FASN,FDFT1,FDPS,GTF2I,HMGCR,IDI1,INSIG1,IRS2,LDLR,LSS,MSMO1,MVD,MVK,NSDHL,PMVK,SC5D,SCD,SQLE,TM7SF2,TMEM97	278
SREBF1	TRANSCRIPTION REGULATOR	Inhibited	-4.126	9.01x10-14	ACSS2,CDKN1A,CYP51A1,CYP7A1,DHCR7,ELOVL6,FADS1,FASN,FDFT1,FDPS,HMGCR,HSPA1A/HSPA1B,IDI1,INSIG1,IRS2,LDLR,LGALS3,LSS,MLYCD,MSMO1,MVD,MYOG,NSDHL,PIK3R3,PMVK,SC5D,SCD,Scd2,SERPINE1,SQLE,TM7SF2,TMEM97,TTN,UCP2	220
INSR	KINASE	Inhibited	-3.634	1.77x10-6	CCND1,CCND2,CDKN1A,CFL1,COL6A3,COx4I1,CYP1B1,CYP51A1,DAG1,DDR2,DHCR7,DUSP1,ETFB,FDFT1,FDPS,Foxn3,HMGCR,IDI1,LSS,MMP11,MSMO1,MVD,MVK,MxI1,NSDHL,OGDH,PDCD4,PDK4,SC5D,SERPINE1,SOCS3,SQLE,UCP2,VCAM1	238
MIBOLERONE	CHEMICAL DRUG	Inhibited	-3.313	1.95x10-6	CCND1,CCNL2,CLU,COL6A3,CYP4V2,CYP51A1,EIF2S1,FDPS,FKBP1A,IRF7,LDLR,LSS,Rrbp1,Scd2,SQLE,TGFBI,TIMP3,UCP2
ISOQUERCITRIN	CHEMICAL DRUG	Inhibited	-3.302	1.48x10-13	CYP51A1,DHCR7,FASN,FDFT1,FDPS,HMGCR,INSIG1,LDLR,MSMO1,SC5D,SQLE	143
ROSUVASTATIN	CHEMICAL DRUG	Inhibited	-3.302	5.42x10-9	CYP51A1,CYP7A1,DHCR7,FDFT1,FDPS,HMGCR,IDI1,LDLR,MVD,MVK,PMVK
SIRT2	TRANSCRIPTION REGULATOR	Inhibited	-3.162	2.40x10-10	DHCR7,FDFT1,HMGCR,IDI1,LSS,MVD,MVK,PMVK,SC5D,SQLE	104
EZETIMIBE	CHEMICAL DRUG	Inhibited	-3.145	1.17x10-10	CYP51A1,DHCR7,FDFT1,FDPS,HMGCR,IDI1,LDLR,MVD,MVK,PMVK	160
ATORVASTATIN	CHEMICAL DRUG	Inhibited	-3.002	2.17x10-8	ABCC1,CYP51A1,CYP7A1,CYR61,DHCR7,DUSP1,FDFT1,FDPS,HMGCR,HSD17B7,HYPK,IDI1,LDLR,LSS,MAPK3,MSMO1,MVD,MVK,NSDHL,PMVK,SERPINE1,SOD3,SPP1,SQLE,TM7SF2,VCAM1	242
LOVASTATIN	CHEMICAL DRUG	Inhibited	-2.942	3.84x10-7	ADAM10,CCND1,CDKN1A,COTL1,DHCR7,EBNA1BP2,FASN,FDFT1,FDPS,HMGCR,LDLR,MPP6,MVD,MVK,PIK3R3,PMVK,SERPINE1,TNFRSF11B	335
ATP7B	TRANSPORTER	Inhibited	-2.887	7.03x10-9	CYP51A1,CYP7A1,ELOVL6,FASN,FDFT1,FDPS,HMGCR,IDI1,LDLR,LSS,MSMO1,SQLE
PITAVASTATIN	CHEMICAL DRUG	Inhibited	-2.8	5.59x10-7	CYP51A1,FDFT1,FDPS,HMGCR,IDI1,LSS,MVD,SQLE	89
PIRINIXIC ACID	CHEMICAL TOXICANT	Inhibited	-2.661	3.37x10-11	ABCC1,ACSS2,AKR1C3,ASNS,BSG,CCNB1,CCND1,CCT6A,CDKN1A,CFH,CLU,CxCL12,CYP7A1,ECH1,EIF3E,ELOVL6,FADS1,FASN,FKBP1A,Gk,GSTM3,HMGCR,Hmgn2 (includes others),ID2,IFITM3,INSIG1,LDLR,LGALS3,MARK2,MLYCD,NBN,PDCD4,PDK4,PIK3R3,PLA2G2A,PPIC,PSMB4,RBFOx2,RORA,RTN4,SC5D,SCD,SERPINE1,UBQLN2,UCP2,VCAM1,Yap1	158
PPARGC1B	TRANSCRIPTION REGULATOR	Inhibited	-2.614	5.72x10-7	CCND1,COx4I1,FASN,FDFT1,FDPS,HMGCR,LSS,MVD,MVK,PDK4,SCD,SQLE	146
SOCS3	PHOSPHATASE	Inhibited	-2.608	7.15x10-4	CCND1,CDKN1A,FASN,IRS2,JAK2,SCD,SOCS3,STAT3,STAT6,TRAF6	301
DBI	OTHER	Inhibited	-2.449	1.65x10-5	ACSS2,ELOVL6,FASN,HMGCR,LSS,SQLE	235
MBTPS1	PEPTIDASE	Inhibited	-2.449	2.97x10-6	FASN,FDFT1,FDPS,HMGCR,LDLR,SCD	173
RABL6	OTHER	Inhibited	-2.449	2.94x10-2	CCNB1,DUT,HMMR,SMAD6,TMEM97,TTK
CYP7A1	ENZYME	Inhibited	-2.433	8.13x10-6	CYP7A1,FASN,FDFT1,FDPS,HMGCR,LDLR	81
TOSEDOSTAT	CHEMICAL DRUG	Inhibited	-2.425	6.08x10-4	ASNS,ATF5,CDKN1A,MARS,PSAT1,SDC1
FLUTAMIDE	CHEMICAL DRUG	Inhibited	-2.412	2.25x10-3	CXCL2,CYP1B1,CYR61,Flt1,FOXQ1,GAS6,IL6ST,PSCA
RXRA	LIGAND-DEPENDENT NUCLEAR RECEPTOR	Inhibited	-2.388	1.40x10-2	ASNS,CCNB1,CCND1,CDKN1A,CYP7A1,FASN,INSIG1,MID1IP1,MLYCD,MMP11,PLA2G2A,RORA,SCD,SDC1,SPP1,TFAP2A,TGFB2
FGF4	GROWTH FACTOR	Inhibited	-2.376	8.15x10-6	CDKN1A,FOXO4,HMGCR,JAG1,MMP14,SCD,Scd2	251
EIF4E	TRANSLATION REGULATOR	Inhibited	-2.373	3.73x10-1	CCND1,CDKN1A,EIF4EBP1,INSIG1,LSM6,SVIL
XBP1	TRANSCRIPTION REGULATOR	Inhibited	-2.354	3.03x10-3	ADAM10,ATP2A2,CXCL2,FASN,FKBP10,FKBP2,GOLGA4,NUCB2,RAB33B,RPN2,Rrbp1,SEC11C,SSR1,TRAM1,VCAM1,YIF1A
MAPK1	KINASE	Inhibited	-2.351	6.81x10-3	ADAR,ARHGAP11A,ATP1B1,C1S,CCNB1,CCND1,CDKN1A,CHST2,DAB2,DUSP1,ENDOD1,FHL2,IFITM3,IRF7,ISG15,LGALS3,MAPK3,MYRF,SPP1,SPRY4,STAT1,TRIM25	288
TRIM24	TRANSCRIPTION REGULATOR	Inhibited	-2.335	2.60x10-3	AGRN,IRF7,ISG15,JAK2,LGALS3,PCLAF,SERPINE1,SPP1,STAT1,TGFBI
ALPHA CATENIN	GROUP	Inhibited	-2.331	1.23x10-3	C1QTNF2,COL6A3,CXCL12,CXCL2,FSTL1,IL6ST,MMP11,SGK1,SOCS3,STEAP2,VCAM1,ZYX	140
MYC	TRANSCRIPTION REGULATOR	Inhibited	-2.291	1.95x10-10	ABCA7,ABCC1,ACTN1,AKAP12,ANKRD17,ANXA4,ARF3,ASNS,AXL,CCNB1,CCND1,CCND2,CD151,CD44,CD47,Cdc42,CDKN1A,CHRNB1,CLU,COL4A1,COL4A2,COL6A3,CSDE1,CSRP2,CTNNA1,DBN1,DUSP1,EIF2S1,EIF4EBP1,EIF4G1,FASN,FCGRT,FLNA,FSTL1,FTH1,GGH,H2AFZ,Hmgn2 (includes others),ID2,ID3,INHBA,IRF7,ITGA3,ITGA6,ITGB1,KLF6,KRT7,MAG,MAPK3,MFAP1,MYLPF,NARS,NBN,NF2,NFAT5,NOP56,NUCB1,PAM,PDCD4,PEX19,PLA1A,POLDIP3,PSAT1,PYCR1,SCAMP1,Scd2…	264
INS	OTHER	Inhibited	-2.287	2.16x10-3	ADAM10,CCND1,CDKN1A,COX4I1,CYR61,EIF4EBP1,ELK1,ERRFI1,FASN,HMGCR,IGFBP5,IRS2,SCD	282
miR-1-3P (and other miRNAS W/SEED GGAAUGU)	MATURE MICRORNA	Inhibited	-2.253	6.86x10-4	ADAR,AGRN,ARF3,AXL,CDCP1,CLCN3,FSTL1,GAK,MTHFD2,NOTCH2,PDCD4,SFXN1,SLC25A30,SLC44A1,SYNE1,TIMP3,XPNPEP3
TO-901317	CHEMICAL REAGENT	Inhibited	-2.241	7.87x10-5	APOD,CCNB1,CCND1,CFH,CYP7A1,DHCR7,ELOVL6,FADS1,FASN,FDFT1,FDPS,Gk,HSD17B12,ITGA6,LDLR,LGALS3,MID1IP1,SCD,Scd2,SERPINA3,TIMP3	161
TETRACYCLINE	CHEMICAL DRUG	Inhibited	-2.236	1.39x10-1	AUH,CACNA2D1,JAG1,SERPINE1,SLC25A30
1,4-BIS[2-(3,5-DICHLOROPYRIDYLOXY)]BENZENE	CHEMICAL TOXICANT	Inhibited	-2.214	1.14x10-2	CCNB1,CCND1,CDKN1A,CYP39A1,CYP7A1,EIF4EBP1,INSIG1,INSIG2,WISP1
P70 S6K	GROUP	Inhibited	-2.213	1.44x10-3	BCL2L11,CCND1,FASN,PDCD4,SCD	266
UCP1	TRANSPORTER	Inhibited	-2.205	2.17x10-6	ASNS,ATF5,CLCN3,EIF4EBP1,FASN,Hmgn2 (includes others), HSD17B7, MTHFD2, MYOG, PGD,PHGDH,PSAT1,PYCR1,SERPINE1,SLC3A2,SMS,TTLL7,UCP2
SP3	TRANSCRIPTION REGULATOR	Inhibited	-2.201	4.82x10-2	AHRR,AKAP12,ASNS,CCND1,CDKN1A,CYP51A1,DUSP1,FDX1,LDLR,Rhox5,SERPINE1,SGK1,STAT1
4-PHENYLBUTYRIC ACID	CHEMICAL - ENDOGENOUS MAMMALIAN	Inhibited	-2.2	1.50x10-1	CDKN1A,CXCL12,HSPA4,STRN3,TCERG1
CLOZAPINE	CHEMICAL DRUG	Inhibited	-2.187	1.49x10-3	DHCR7,FASN,FDPS,HMGCR,LDLR,SC5D,SCD,SGK1	246
IRS1	ENZYME	Inhibited	-2.18	2.04x10-6	ACTR3,CCND1,COL4A1,COL4A2,COL6A3,DBN1,FASN,HMGCR,ID2,IRS2,LDLR,MMP14,MYLPF,SPP1,TGFBI,UCP2,WISP1	276
H89	CHEMICAL - KINASE INHIBITOR	Inhibited	-2.158	2.66x10-2	CCND1,CD14,CDKN1A,DUSP1,IGFBP5,SDC1,SERPINE1,SHC1,UCP2,VCAM1
HIPK2	KINASE	Inhibited	-2.147	9.36x10-2	ANK1,CCND2,CDKN1A,LGALS3,SLC4A1
RALOXIFENE	CHEMICAL DRUG	Inhibited	-2.129	2.41x10-7	CBX6,CCNB1,CCND1,CDKN1A,CLU,CXCL12,CYP1B1,DBN1,DUSP1,ECH1,HSPA1A/HSPA1B,ITGB1,KLF6,KRT7,LDLR,PXDN,SERPINE1,SPP1,TGFB2,TIMP3,TNFRSF11B,WISP2	318
BETA-ESTRADIOL	CHEMICAL - ENDOGENOUS MAMMALIAN	Inhibited	-2.098	8.64x10-14	AGRN,ANXA4,AP1B1,APOD,ARNT2,ART3,ATF5,ATP1B1,BAZ1A,BCL2L11,BNIP2,Brd4,BSG,BTG1,C8orf44-SGK3/SGK3,CBL,CBX6,CCNB1,CCND1,CCND2,CD14,CD44,CDH15,CDKN1A,CLCN3,CLU,CNN2,CXADR,CXCL12,CXCL2,CYP1B1,CYP51A1,CYR61,DBN1,DHCR7,DUSP1,ECH1,EIF2S1,EIF3J,ERF,FADS1,FAM111A,FASN,FCGRT,FDFT1,FHL2,FSTL1,GSTM3,HMGCR,HSD17B12,HSD17B7,HSPA4,ID2,IFRD1,IGFBP5,IL6ST,INHBA,INSIG2,IRF7,IRS2,ISG15,JAG1,JAK2,KLF6,KRT7,LDLR,LGAL…	353
KRAS	ENZYME	Inhibited	-2.057	1.02x10-9	ACTR3,AGRN,AOX1,ATP1B1,AXL,Basp1,BSG,CCND1,CD44,CDKN1A,CLU,COL4A1,CXADR,DBN1,Dclk1,DUSP1,ELK1,ENOPH1,EPHB4,FSTL1,FTH1,GSN,GTF2I,IFITM3,IL33,ISG15,KLF6,NUTF2,PAIP2,PLA1A,S100A4,SEC11C,SERPINA3,SERPINE2,SLC3A2,SORT1,SOX9,SPP1,STAT1,STAT3,TCERG1,TCP1,TNFRSF11B,Tpi1 (includes others),Tpm3,UBA1,ZEB1	301
ESR1	LIGAND-DEPENDENT NUCLEAR RECEPTOR	Inhibited	-2.052	6.38x10-11	ANXA4,AP1M1,AP1S1,ATF5,ATG3,ATP1B1,BCL2L11,CBL,CCNB1,CCND1,CCPG1,CDKN1A,CHST2,CLCN3,COTL1,CXADR,CXCL12,CYP1B1,CYP7A1,DAB2,DHCR7,EEA1,ENY2,FASN,FLNA,FOXO4,GGA2,GNG12,GSN,HIPK2,HMGCR,HSD17B7,IFITM3,IFRD1,IGFBP5,IL6ST,IRS2,ITGA6,JAK2,KRT7,LDLR,LOXL4,NDC1,NEB,NF2,NFAT5,NFIB,NUCB1,NUP35,PDCD4,PDK4,PDLIM5,PIMREG,PLAC1,PLXNA2,PRKX,PRPF40A,PSAT1,PTPN4,PYCR1,RAB31,RAB5C,RALA,RERE,RND3,RNF41,SCAMP1,SCN1B,S…	344
CD38	ENZYME	Inhibited	-2.048	3.61x10-6	ASNS,ATP1B1,CCND2,CD44,CLCN3,EIF4EBP1,HIGD1A,HMMR,LGALS3,PSAT1,PYCR1,S100A4,Scd2,SDC1,SLC7A5,SOCS3,TMEM97,UCHL3,VCAM1	198
NOTCH1	TRANSCRIPTION REGULATOR	Inhibited	-2.007	8.42x10-3	ADAM19,CCND1,CCND2,CD14,CD44,CD82,CDKN1A,CYR61,ID2,ITGA6,ITGB1,JAG1,NR2F2,RND3,SERPINE1,SPP1,TGFB2	267
SB 216763	CHEMICAL TOXICANT	Inhibited	-2	4.31x10-4	CCND1,CYR61,FASN,FSCN1,MYOG,RND3,SCD	279
FMO3	ENZYME	Inhibited	-2	3.42x10-3	ELOVL6,FASN,PDK4,SCD	115
PPP1R13L	TRANSCRIPTION REGULATOR	Inhibited	-2	5.11x10-3	CCND2,CDKN1A,ITGA3,ITGB1	177
PD 169316	CHEMICAL - KINASE INHIBITOR	Inhibited	-2	6.14x10-3	CCND1,CCND2,CDKN1A,TIMP3	255
EIF2AK4	KINASE	Inhibited	-2	1.94x10-2	ASNS,ATG3,PHGDH,PSAT1
FUCOIDIN	CHEMICAL REAGENT	Inhibited	-2	1.94x10-2	CDKN1A,CXCL12,IRF7,ISG15
ACKR2	G-PROTEIN COUPLED RECEPTOR	Inhibited	-2	4.31x10-2	ADAR,IRF7,ISG15,STAT1
AGTR1	G-PROTEIN COUPLED RECEPTOR	Inhibited	-2	5.08x10-2	CCND1,DUSP1,SERPINE1,XDH
PLATELET ACTIVATING FACTOR	CHEMICAL - ENDOGENOUS MAMMALIAN	Inhibited	-2	1.23x10-1	CDKN1A,GAS6,MMP14,SERPINE1
HIST1H1T	OTHER	Inhibited	-2	3.75x10-1	CD81,FDPS,HSPA4,MARS
HIST1H1A	OTHER	Inhibited	-2	3.75x10-1	CD81,FDPS,HSPA4,MARS
LG100268	CHEMICAL REAGENT		-1.987	5.49x10-2	CYP7A1,HMGCR,LDLR,SCD
HALOPERIDOL	CHEMICAL DRUG		-1.986	3.55x10-2	HMGCR,LDLR,PRKCA,RASA1,SC5D,SCN1B,SLC18A3
MLXIPL	TRANSCRIPTION REGULATOR		-1.984	2.18x10-2	ELOVL6,FASN,MID1IP1,SCD
NQO1	ENZYME		-1.982	4.31x10-2	CCND1,CDKN1A,CXCL12,VCAM1
MLX	TRANSCRIPTION REGULATOR		-1.98	5.11x10-3	ELOVL6,FASN,MID1IP1,SCD
USP18	PEPTIDASE		-1.98	8.58x10-3	IFITM3,IRF7,ISG15,SOCS3	114
FASN	ENZYME		-1.98	4.69x10-2	ELOVL6,FASN,MLYCD,SCD
PAK1	KINASE		-1.969	2.43x10-2	CCNB1,CCND1,MMP14,NF2
BTK	KINASE		-1.961	1.14x10-1	CBL,CCND2,CCT6A,CDKN1A,ISG15,MTHFD2,STAT1
DEOXYCHOLATE	CHEMICAL - ENDOGENOUS MAMMALIAN		-1.959	1.11x10-1	CCND1,CYP7A1,LDLR,SLC1A3
miR-210	MICRORNA		-1.949	5.31x10-2	COL4A2,CXCL12,KLF6,SCARA3,SERTAD2,SMCHD1,STAT6
BRAF	KINASE		-1.945	2.37x10-2	BCL2L11,CCND1,CDKN1A,ITGB1,MMP14,RND3,SERPINE2
TGFB2	GROWTH FACTOR		-1.942	7.86x10-2	JAG1,PDK4,SCD,SERPINE1,SPP1,TGFB2,TNFRSF11B
SPDEF	TRANSCRIPTION REGULATOR		-1.941	1.53x10-4	CDKN1A,COL4A1,COL4A2,COL6A3,ITGA3,ITGA6,PRKCA,SDC1,SERPINE1,ZEB1	171
FGFR1	KINASE		-1.913	1.55x10-5	CCND1,CCND2,CDKN1A,DUS2,EIF3C,EIF4EBP1,EIF4EBP2,EIF4G1,GRINA,LEPROTL1,MMP14,PDCD4,PLXNB2	328
PDGF (COMPLEX)	COMPLEX		-1.896	2.21x10-6	CCND1,CCND2,CD44,CDKN1A,COL4A1,EIF2S1,ERRFI1,INHBA,IRS2,JAG1,LDLR,PIK3R3,SERPINE1,TIMP3,VCAM1	248
RHOA	ENZYME		-1.892	6.54x10-5	CCNB1,CCND1,Cdc42,CDKN1A,ITGB1,MMP14,MYLPF,MYOG,RND3,SOX9,STAT3,VCAM1	308
NR1I2	LIGAND-DEPENDENT NUCLEAR RECEPTOR		-1.89	3.46x10-3	CDKN1A,CYP4V2,CYP7A1,ELOVL6,FASN,Gsta4,GSTM3,INSIG1,INSIG2,PGD,SCD,STAT3,TNFRSF11B	246
ZBTB16	TRANSCRIPTION REGULATOR		-1.89	4.76x10-2	CD14,CD44,CD81,CDKN1A,ID2,ID3,IL6ST,RORA,SPP1
KLF15	TRANSCRIPTION REGULATOR		-1.88	7.31x10-2	FASN,MLYCD,PDK4,SCD
SOCS1	OTHER		-1.867	1.18x10-4	CCND1,CD44,CXCL2,DUSP1,IFNAR1,IRF7,IRS2,ISG15,JAK2,SOCS3,STAT1,STAT3,STAT6,VCAM1	258
CYR61	OTHER		-1.86	2.09x10-4	BCL2L11,CCND1,CCND2,CDKN1A,CXCL2,CYR61,IL6ST,ITGA3,ITGB1,SERPINE1,TCF7L1	276
GPER1	G-PROTEIN COUPLED RECEPTOR		-1.839	5.11x10-3	ASAH1,CCND1,CDKN1A,FASN	242
ERBB3	KINASE		-1.824	3.00x10-6	ADAM19,CCND1,CCND2,CD47,CDKN1A,CLU,CXCL12,DUSP1,IGFBP5,MXI1,NID1,SERPINA3,SOCS3,TIMP3	224
ERK	GROUP		-1.8	2.34x10-3	ACTN1,ADAM10,BCL2L11,CCND1,CDKN1A,CLU,CXCL2,DUSP1,IFNAR1,JAG1,LDLR,MMP14,PDK4,SERPINE1,SORT1,SOX4,SPTBN1,STAT1	310
FSH	COMPLEX		-1.797	1.33x10-3	ACTN1,AKAP12,ATP2A2,AXL,CCND2,DAB2,DHCR7,DUSP1,FDX1,INHBA,ITGA3,LDLR,MSMO1,MYRF,PLA1A,PRKX,RAB31,RAB33B,RAB5C,SERPINE1,SGK1,SMAD6,SMARCA4,STAT1,TGFB2,TNFRSF11B,ZEB1	308
WNT3A	CYTOKINE		-1.791	3.99x10-5	ADAM10,ATP1B1,CAVIN4,CCND1,CCND2,CD44,CXCL12,CYR61,FHL2,IGFBP5,IRS2,MMP14,Nes,PMEPA1,SERPINB1,SOX9,TGFB2,TIMP3,TNFRSF11B,TNN,VCAM1,WISP1,WISP2	234
NR1H2	LIGAND-DEPENDENT NUCLEAR RECEPTOR		-1.786	1.69x10-2	CYP7A1,ELOVL6,FASN,FDFT1,FDPS,HMGCR,LDLR,SCD
PNPLA2	ENZYME		-1.78	1.92x10-3	FASN,Gk,PDK4,UBE2B,UCP2,ULK1	156
IRF4	TRANSCRIPTION REGULATOR		-1.772	2.59x10-3	CCNB1,IL33,IRF7,ISG15,ITGB1,JAK2,PRKCA,RORA,SMARCA4,SPP1,STAT1,SUB1,UBE2H	216
REL	TRANSCRIPTION REGULATOR		-1.769	3.46x10-1	ACSS2,CCND1,CCND2,CDKN1A,COTL1,DUT,PHGDH,SPIN1,STAT3,TTK
PRNP	OTHER		-1.768	8.89x10-4	CCND1,CD44,DAB2,EIF2S1,ETS2,HSPA1A/HSPA1B,ID2,SOX9,TCF7L1	272
ATF4	TRANSCRIPTION REGULATOR		-1.765	2.41x10-10	ASNS,ATF5,CDKN1A,CYP7A1,DDR2,EIF4EBP1,FASN,IGFBP5,JAG1,LGALS3,MARS,MED13L,MID1IP1,MTHFD2,NARS,PHGDH,PRRX2,PSAT1,Ptprv,PYCR1,SERPINF1,SLC3A2,SLC7A5,STAT3,TNFRSF11B	264
FBXO32	ENZYME		-1.744	3.23x10-3	BCL2L11,CCND2,CSRP2,CXCL2,ITGA3,MYOG,PTGIS,PYCR1,SELENOS	104
SREBP	GROUP		-1.718	1.26x10-5	ACSS2,CDKN1A,FASN,LDLR,PGD,UCP2
MED1	TRANSCRIPTION REGULATOR		-1.715	3.66x10-3	CCNB1,CCND1,CCND2,CDKN1A,CYP7A1,FASN,Gk,HPRT1,ID2,LBR,PDK4,SMARCA4,WISP2	377
ERBB4	KINASE		-1.707	3.94x10-7	ADAM19,CCND1,CDKN1A,CXCL12,DUSP1,IGFBP5,MXI1,NID1,PTGIS,RASA3,SERPINA3,SERPINE2,SOCS3,TIMP3,WISP2	215
ADORA2A	G-PROTEIN COUPLED RECEPTOR		-1.706	4.76x10-2	ARF3,ATP2A2,CD28,CD81,CXCL2,DUSP1,Eif1,IFITM3,SPTBN1
TEMPOL	CHEMICAL DRUG		-1.698	1.43x10-3	CXCL2,SERPINE1,SGK1,SPP1,UCP2,VCAM1	252
INS1	OTHER		-1.67	7.73x10-5	CCND1,CDKN1A,CYP7A1,EIF4EBP1,ELOVL6,ERRFI1,FADS1,FASN,FDFT1,Gk,HMGCR,IGFBP5,IL6ST,IRS2,ITGA6,LDLR,MAPK3,MYOG,PRKCA,SCD,Scd2,SERPINE1,SOCS3,STAT3,TIMP3,ZNF106	202
CHROMIUM	CHEMICAL DRUG		-1.667	1.04x10-4	ABHD4,AJUBA,C1QTNF2,Gsta4,PGD,RSRP1,SOD3,TAF6,ZWINT
BMP7	GROWTH FACTOR		-1.647	1.75x10-3	CD44,CDKN1A,FASN,ID2,IGFBP5,MAPK3,RNF111,S100A4,SERPINE1,SMAD6,SOCS3,SPP1	232
RORA	LIGAND-DEPENDENT NUCLEAR RECEPTOR		-1.633	2.25x10-4	ADGRL1,ASNS,ATP1B1,CCNB1,CYP39A1,ELOVL6,FASN,FDFT1,Gk,HMGCR,HSD17B7,MYOG,NSDHL,RORA,SCD,Scd2,SOCS3,UCP2
SB203580	CHEMICAL - KINASE INHIBITOR		-1.615	3.02x10-4	BCL2L11,CCNB1,CCND1,CDKN1A,CYP1B1,DUSP1,ETS2,Gsta4,IRF7,ISG15,MYLPF,MYOG,NEFH,PSMB4,RBMS2,SERPINE1,SGK1,SOCS3,SOD3,SPP1,STAT1,TGFB2,TIMP3,TNFRSF11B,UCP2,VCAM1,XDH	267
EP300	TRANSCRIPTION REGULATOR		-1.614	4.11x10-5	AHI1,AKAP12,CBL,CCND1,CDKN1A,CYP7A1,DUSP1,FASN,FDX1,FNDC3B,FTH1,Gk,GRAMD2B,HMGCR,ID2,ID3,IL17RE,ITGA6,LAMC2,MBTPS1,MFHAS1,MMP11,MYOG,PDK4,RASA3,SDC1,SMAD6,SMOC1,SOCS3,TGFB2,TIPARP,Tsc22d3,TUBA8	289
RAS	GROUP		-1.611	1.43x10-3	BCL2L11,CCND1,CDKN1A,LDLR,PDCD4,RAE1,SERPINE1,SERPINE2,STAT1,ZEB1
GLUTATHIONE	CHEMICAL - ENDOGENOUS MAMMALIAN		-1.609	4.2410-3	ABCC1,BCL2L11,CCND1,CDKN1A,MYOG,SERPINE1,VCAM1	215
IL3	CYTOKINE		-1.554	3.35x10-2	ATF5,BCL2L11,CCND1,CCND2,CD14,CDKN1A,ECH1,FASN,IL33,NARS,NIFK,PHGDH,RALA,SERPINA3,SLC3A2,SOCS3,SOX4,UCP2,VCAM1
SPHINGOSINE-1-PHOSPHATE	CHEMICAL - ENDOGENOUS MAMMALIAN		-1.548	1.08x10-2	CCND1,CD44,CXCL2,MMP14,PLA2G2A,SERPINE1,TNFRSF11B,VCAM1
IL5	CYTOKINE		-1.528	5.50x10-4	ASNS,ATP1B1,CCND2,CDKN1A,EIF4EBP1,HIGD1A,HMGCR,HMMR,IDI1,IRF7,PSAT1,PSMB4,PYCR1,S100A4,Scd2,SGK1,SLC7A5,TMEM97,TRA2A,UCHL3,YES1,ZYX	202
IL2	CYTOKINE		-1.509	1.92x10-2	ABCC1,ARNT2,ATF5,CCND1,CCND2,CD28,CD44,CD47,CDKN1A,CXCL12,DAP,EEF1E1,HSPA1A/HSPA1B,IDI1,ITGA6,ITGB1,JAK2,KLF6,LDLR,NIFK,PDCD4,PIK3R3,PPP6C,PRKX,S100A4,SOCS3,SPP1,STAT3,TNFRSF11B,TRAF6
TRANS-HYDROXYTAMOXIFEN	CHEMICAL DRUG		-1.5	4.67x10-6	ARNT2,CBX6,CLU,CXCL12,CYP1B1,DBN1,DUSP1,ECH1,INSIG2,KLF6,KRT7,PXDN,RAB31,RND3,TGFB2,WISP2	255
MIR-1	MICRORNA		-1.492	6.01x10-3	ADAR,CACNB2,CCND2,GATAD2A,MYOG,PDCD4,RASA1,SMARCA4,SOX9,TNS3
BENZENE	CHEMICAL TOXICANT		-1.488	1.07x10-3	ATF5,CD47,CDKN1A,ECE1,ID2,LOC257642,PDCL3,RTN4
PI3K (COMPLEX)	COMPLEX		-1.478	1.79x10-9	BCL2L11,CCNB1,CCND1,CCND2,CCT6A,CD44,CDKN1A,CYP7A1,DUSP1,HMGCR,IL33,ITGA6,ITGB1,MMP14,MTHFD2,PDCD4,RASA3,Rcan1,RND3,SERPINE1,SGK1,SOCS3,SOX9,SPP1,TRIM25,VCAM1	222
CHLOROPROMAZINE	CHEMICAL DRUG		-1.477	1.52x10-9	DHCR7,FDFT1,FDPS,HMGCR,IDI1,LDLR,LSS,MSMO1,MVK,SC5D,SCD,SERPINA3,SQLE
PROC	PEPTIDASE		-1.477	2.43x10-2	CLU,CXCL2,PLA2G2A,SERPINE1,VCAM1
TP73	TRANSCRIPTION REGULATOR		-1.464	8.51x10-5	ABCC1,ADAM10,ADAM19,AUH,BCL2L11,C1R,CCNB1,CDKN1A,COX4I1,CXCL2,CYR61,FASN,FXR1,HSPA1A/HSPA1B,ID2,IGFBP5,JAG1,MMP14,PIK3R3,SERPINA3,SERPINE1,SERPINE2,SERPINF1,SPP1,TBL1X,ULK1,WISP2	270
MEOX2	TRANSCRIPTION REGULATOR		-1.461	1.25x10-2	CDKN1A,CXCL2,ID3,MMP14,VCAM1
ACTINOMYCIN D	CHEMICAL DRUG		-1.457	1.21x10-4	BCL2L11,CCND1,CD28,CDKN1A,CYR61,DUSP1,ERRFI1,FASN,FLNA,FTH1,ID2,IGFBP5,IRS2,PLA2G2A,PTGIS,PXN,SERPINE1,SOCS3,SPP1,TBC1D10A,UBE2B	253
ABL1	KINASE		-1.455	1.01x10-2	BCL2L11,CCND1,CCND2,CDKN1A,TGFB2
PIM1	KINASE		-1.455	1.39x10-2	ATP2A2,CCNB1,CCND2,CDKN1A,ID2,IGFBP5
IGF1	GROWTH FACTOR		-1.452	1.23x10-5	ACSS2,BCL2L11,BSG,CCNB1,CCND1,CCND2,CD44,Cdc42,CDKN1A,CLU,CYR61,FASN,HMGCR,ID2,IFITM3,IGFBP5,IRS2,MAPK3,MMP14,MYOG,NEFH,PLA2G2A,Rcan1,SCD,SERPINE1,SOCS3,SPP1,SQLE,TGFBI,TNFRSF11B,UBE2B,UBTF,VCAM1	292
ESTROGEN	CHEMICAL DRUG		-1.441	1.43x10-3	ART3,AXL,CCND1,CDKN1A,CLU,COL4A2,CXCL12,CYR61,DUSP1,Flt1,FTH1,HMGCR,IGFBP5,ITGB1,LDLR,MVD,SERPINA3,SERPINE2,SPP1,TGFB2,TNFRSF11B	323
NR1I3	LIGAND-DEPENDENT NUCLEAR RECEPTOR		-1.437	3.10x10-2	CDKN1A,CYP39A1,CYP7A1,EIF4EBP1,Gsta4,INSIG1,INSIG2,WISP1
PTPN1	PHOSPHATASE		-1.432	3.87x10-2	CXCL2,DUSP1,FASN,IRS2,RASA1
SP1	TRANSCRIPTION REGULATOR		-1.43	2.46x10-4	AHRR,AKAP12,ANK1,ASNS,ATP2A2,ATP6V0C,ATP7A,CCND1,CCND2,CD28,CDKN1A,CIRBP,CXCL12,CYP1B1,CYP51A1,FASN,FDX1,FLNA,HMGCR,HSD17B7,IFITM3,KLF6,LDLR,MMP11,MMP14,PLAC1,PRKCA,Rhox5,SERPINE1,SERPINE2,SGK1,SLC4A2,SOX9,SPP1,STAT1,TGFB2,TIMP3	327
E2F3	TRANSCRIPTION REGULATOR		-1.414	2.22x10-2	AKR1C3,CCNB1,CCND1,CDKN1A,DAG1,ECE1,INHBA,LBR,PCLAF,SERPINE1,TIMP3,UXT
TSC2	OTHER		-1.412	2.61x10-6	ACSS2,ATP6V0C,CCND1,CCND2,CDKN1A,GGA2,GSN,IFITM3,IRS2,LGALS3,NSDHL,PDK4,PRKCA,SCD,STAT1,UCP2	327
BENZYLOXYCARBONYL-LEU-LEU-LEU ALDEHYDE	CHEMICAL - PROTEASE INHIBITOR		-1.393	6.72x10-4	BCL2L11,CCND1,CCND2,CDKN1A,CFL1,CLU,CXCL2,DAG1,DDR2,DUSP1,EIF4EBP1,HSPA4,IRF7,IRS2,ITGB1,MMP11,MRTO4,PDCD4,PXN,STAT1,SUB1,TTK,VCAM1	221
NFYA	TRANSCRIPTION REGULATOR		-1.387	2.84x10-2	CCNB1,CDKN1A,FASN,FTH1,HSD17B7,SCD,Scd2
FENOFIBRATE	CHEMICAL DRUG		-1.373	1.84x10-6	ASNS,BCL2L11,CCND1,CLU,CYP7A1,ECH1,EIF3E,FASN,Gsta4,ID2,IL6ST,LDLR,MARK2,MLYCD,NBN,PDK4,PIK3R3,PPIC,RBFOX2,RORA,SC5D,SCD,SERPINE1,UCP2,VCAM1,Yap1	198
WNT1	CYTOKINE		-1.359	3.20x10-6	CCNB1,CCND1,CCND2,CDKN1A,CSNK2A2,DUS2,EIF3C,EIF4EBP1,EIF4EBP2,EIF4G1,ETS2,PDCD4,SERPINE1,SERPINE2,SPP1,WISP1,WISP2	294
L-TRIIODOTHYRONINE	CHEMICAL - ENDOGENOUS MAMMALIAN		-1.353	7.54x10-6	ATP1B1,ATP2A2,C1S,CCND1,CD44,CDKN1A,CLU,COL4A1,COX4I1,CXCL12,CYP7A1,DUSP1,ECE1,EIF4EBP2,FASN,FKBP10,ID2,ID3,LDLR,MMP14,NFIB,NID1,PDK4,PLA2G2A,SCD,Scd2,SERPINE1,Tpi1 (includes others),TTN,UBA1,UCP2	219
BMP6	GROWTH FACTOR		-1.342	3.57x10-5	ARMCX3,CAVIN2,CD44,CDKN1A,CYP1B1,CYP39A1,ERRFI1,ID2,ID3,INHBA,PMEPA1,SERPINE1,ZEB1	248
ACTL6A	OTHER		-1.342	3.32x10-4	BCL2L11,CCNB1,CCND1,CCND2,CDKN1A,ETS2	260
SELENOMETHYLSELENOCYSTEINE	CHEMICAL - ENDOGENOUS MAMMALIAN		-1.342	9.47x10-4	ABCC1,ATP1B3,CLU,DRG1,TIMP3
DTX1	TRANSCRIPTION REGULATOR		-1.342	2.10x10-3	CD82,HIGD1A,SPP1,SPRY4,TGFB2
ZBTB20	TRANSCRIPTION REGULATOR		-1.342	3.60x10-2	ACSS2,FASN,GAS6,PDK4,SOCS3
HRAS	ENZYME		-1.327	2.11x10-16	AKAP2,ASNS,ATP2A2,Basp1,BCL2L11,CCNB1,CCND1,CCND2,CD44,CD81,Cdc42,CDKN1A,CLU,CNN2,COL4A1,CSRP2,CXCL12,DUSP1,EIF3C,EIF4EBP1,ELK1,FAM167A,FASN,FDFT1,FLNA,FSTL1,GAS6,GSN,HNRNPUL1,ID2,IGFBP5,ITGA6,ITGB1,KLF3,KLF6,LPP,MAPK3,MMP14,MSMO1,MYOG,NEXN,NID1,PDLIM5,PIP5K1A,PMEPA1,PPIC,PRKCA,PXN,RASA3,Rhox5,RTN4,S100A4,SERPINA3,SERPINE1,SERPINE2,SMARCA2,SOCS3,SOX4,SPIN1,SPP1,SQLE,STAT3,TGFB1I1,TGFB2,TIMP3,WSB2	279
MTA1	TRANSCRIPTION REGULATOR		-1.301	4.71x10-3	CCND1,CCND2,SERPINB1,STAT3,WISP1,WISP2	190
RB1	TRANSCRIPTION REGULATOR		-1.297	1.72x10-3	ATP1B1,BCL2L11,CCNB1,CCND1,CDKN1A,CHRNB1,COL4A3BP,COX4I1,FAM111A,KANK2,MAPK3,MFAP1,MLYCD,OAZ2,PCLAF,PGD,PMEPA1,PTPN4,SAFB,SERPINE1,TGFB2,TMEM97,TNNC2,ULK1,UXT,ZEB1	273
miR-199A-5P (and other miRNAS W/SEED CCAGUGU)	MATURE MICRORNA		-1.296	3.85x10-5	CDKN1A,COL4A1,DYRK1A,ID3,ISG15,ITGA3,JAG1,LAMC2,MYRF,SMTN,TGFB1I1
WWTR1	TRANSCRIPTION REGULATOR		-1.294	9.79x10-6	CD44,CXCL2,CYR61,ID2,MYOG,NF2,SERPINE1,SPP1,VCAM1	79
ERBB2	KINASE		-1.288	8.48x10-14	ADAM19,ATP1B3,BNIP2,CAVIN2,CCNB1,CCND1,CCND2,CD47,CD82,CDCP1,CDKN1A,CHMP2B,CHST2,CLU,COL4A1,COL6A3,CXCL12,DAAM1,DAG1,DAP,EIF4EBP1,ELF2,ELK1,ETFB,FASN,FSCN1,FSTL1,GAS6,HEPH,HSPA1A/HSPA1B,ID2,IGFBP5,IL6ST,ITGA6,ITGB1,JAG1,KDM5B,KRT7,LAMC2,LGALS3,MMP11,MMP14,MXD3,MXI1,NDRG4,NFIB,NID1,NUCB2,PDCD4,PDK4,PMEPA1,RAB31,RASA3,RNF41,S100A4,SDC1,SERPINA3,SERPINE1,SMTN,SOX4,SQLE,SS18L2,STAT3,TCEAL9,TGFBI,TIMP…	265
AG490	CHEMICAL - KINASE INHIBITOR		-1.274	3.18x10-2	AKR1C3,CDKN1A,JAK2,PLA2G2A,SOCS3,SPP1,STAT1
IL13	CYTOKINE		-1.27	3.16x10-3	CD14,CD44,CHST2,CXCL2,FADS1,FKBP1A,GAS6,GSN,JAG1,KLF6,MMP14,MSMO1,MTSS1,MYOG,NID1,PIEZO1,RIN2,SERPINE1,SERPINF1,SOCS3,SORT1,SPP1,STAT6,TNFRSF11B,VCAM1	239
SB202190	CHEMICAL - KINASE INHIBITOR		-1.269	3.24x10-2	CCND1,CCND2,CDKN1A,LDLR,MYOG,PLA2G2A,SERPINE1,SGK1,XDH
TP63	TRANSCRIPTION REGULATOR		-1.262	3.13x10-4	ATG3,BCL2L11,CCNB1,CCND1,CCND2,CD82,CDKN1A,COL4A1,CYR61,FASN,ID3,INHBA,ITGA3,ITGB1,JAG1,KHSRP,KLF6,KRT7,PIK3R3,RBBP6,S100A4,SERPINE1,SERPINF1,TGFB2,TIMP3,UBE2H,ULK1,ZEB1	276
ILK	KINASE		-1.26	6.25x10-5	CCND1,CD44,ITGA6,ITGB1,MAPK3,MYOG,SLC4A1,ZEB1	324
HOMOCYSTEINE	CHEMICAL - ENDOGENOUS MAMMALIAN		-1.252	2.51x10-3	CCND1,CDKN1A,CLU,CXCL12,FDPS,HMGCR,IDI1,SOCS3,VCAM1	245
SIMVASTATIN	CHEMICAL DRUG		-1.243	6.33x10-5	CCND1,CCND2,CD14,CD81,CDKN1A,COTL1,CXCL2,CYR61,FADS1,HMGCR,LDLR,MPP6,SERPINE1,SOCS3,SPP1,ST6GALNAC4,STAT1,STAT6,TNFRSF11B,VCAM1	245
NR1H3	LIGAND-DEPENDENT NUCLEAR RECEPTOR		-1.24	4.31x10-3	APOD,CYP7A1,FASN,FDFT1,FDPS,HMGCR,INSIG2,LDLR,MID1IP1,SCD	154
CBX5	TRANSCRIPTION REGULATOR		-1.238	2.57x10-2	AKR1C3,CDKN1A,CYP1B1,FOXQ1,MYOG,RIN2,RORA,SERPINA3,TGFBI
TGFB3	GROWTH FACTOR		-1.232	1.52x10-2	ADAM19,CDKN1A,CYR61,SCD,SERPINE1,SERPINE2,STAT6,TIMP3,TNFRSF11B
FGF7	GROWTH FACTOR		-1.229	1.73x10-4	CCND1,CD44,CDKN1A,CYP7A1,FASN,HPRT1,SCD,SDC1,SERPINE1,STAT1	253
MEK	GROUP		-1.22	1.33x10-3	AXL,BCL2L11,CCND1,CCND2,CDCP1,CDKN1A,CLU,DDR2,FASN,ID2,ITGA6,ITGB1,MMP14,RND3,SERPINE1,SPRY4,ZEB1	260
NFAT (FAMILY)	GROUP		-1.219	4.60x10-2	CCND1,CYR61,DAAM1,KLF6,SERPINE1,TGFB2,VCAM1
miR-124-3P (and other miRNAS W/SEED AAGGCAC)	MATURE MICRORNA		-1.212	4.78x10-3	AHRR,CYP1B1,ENDOD1,GSN,HEBP2,ITGB1,JAG1,LDLR,NEK9,NFIC,NID1,OAF,SLC25A30,SOX9,STAT3,TRAF6,TUBB6
FAS	TRANSMEMBRANE RECEPTOR		-1.212	8.77x10-3	AKAP2,CD44,CDKN1A,CLASP1,COL4A1,COL4A2,COL6A3,CXCL2,FSCN1,LDLR,LGALS3,MARK2,RALBP1,RASA1,SDC1,SERPINE1,SHC1,SPP1,SPTBN1,STK38L,TLN2,TNFRSF11B,VCAM1	267
METHYLNITRONITROSOGUANIDINE	CHEMICAL TOXICANT		-1.206	1.94x10-2	BTG1,CCND1,CDKN1A,SERPINE1
EGFR	KINASE		-1.202	5.31x10-6	BCL2L11,BTG1,CCND1,CD47,CDCP1,CDKN1A,CXCL12,DAG1,DUSP1,ELK1,ENOPH1,FASN,IGFBP5,IL33,ITGA6,JAG1,MMP14,MXI1,NFIB,NUTF2,PAIP2,PSMB4,PTGIS,SERPINA3,SERPINE1,SERPINE2,SOCS3,SOX9,STAT3,TCERG1,TNFRSF11B,UBA1,ZEB1	263
SMAD	COMPLEX		-1.202	1.16x10-2	CDKN1A,ID2,ID3,SERPINE1
CD3 GROUP	GROUP		-1.192	1.54x10-2	CBLB,FASN,SCD,SLC7A5,STAT3
IL3	CYTOKINE		-1.191	1.53x10-4	ATF5,BCL2L11,CCND2,CD14,Cdc42,CDKN1A,SPP1,TCP1,TROVE2,ZNF346	211
LMNA	OTHER		-1.188	1.38x10-3	CD28,CDH15,DNAJB12,ELK1,HNRNPUL1,ID3,MYOG,Nes,NUFIP2,SELENOS,SFXN1,SMARCA2,SMARCC2,ST6GALNAC4,STAT1,TMEM183A,TNS2,WRB
miR-21-5P (and other miRNAS W/SEED AGCUUAU)	MATURE MICRORNA		-1.187	4.42x10-5	C8orf44-SGK3/SGK3,CDKN1A,JAG1,NFIB,PDCD4,SOD3,STAT3,TGFB2,TIMP3,TNFRSF11B	226
miR-16-5P (and other MIRNAS W/SEED AGCAGCA)	MATURE MICRORNA		-1.186	1.26x10-3	ACTR1A,CACNA2D1,CCND1,CCND2,FNDC3B,HSPA1A/HSPA1B,IFRD1,MAPK3,NOTCH2,PDCD4,PSAT1,RTN4,SERPINE2,SLC12A2,TMEM43,UCP2,ZYX
L-GLUTAMIC ACID	CHEMICAL - ENDOGENOUS MAMMALIAN		-1.178	1.03x10-3	BCL2L11,CBL,CCND1,CDKN1A,CYP7A1,FADS1,FASN,Gk,Scd2,SLC1A3,SLC25A38	295
GCK	KINASE		-1.172	4.04x10-3	CCND2,FASN,IRS2,SCD,Scd2	176
NR4A1	LIGAND-DEPENDENT NUCLEAR RECEPTOR		-1.165	2.40x10-2	APOD,BCL2L11,CCND1,CXCL12,FASN,LDLR,NUCB2,PDK4,SCD,STARD10,UCP2,VCAM1
ADIPOQ	OTHER		-1.157	3.27x10-3	CCND1,CDKN1A,CYP7A1,DUSP1,FASN,Gk,LDLR,PDCD4,SCD,SHC1,SIGLEC10,UCP2,VCAM1	188
NR1H	GROUP		-1.145	2.74x10-3	APOD,ARNT2,ATP1B1,CCND2,CYP7A1,ECE1,ELOVL6,FASN,INSIG2,PLA2G2A,SBNO2,SCD,TIMP3	195
DCN	OTHER		-1.134	5.06x10-4	CDKN1A,DUSP1,ITGB1,MYOG,SDC1,SERPINE1,TIMP3,VCAM1	295
TRICHLOROETHYLENE	CHEMICAL TOXICANT		-1.134	4.67x10-3	ATF5,CD47,ECE1,ID2,LOC257642,PDCL3,RTN4
METHYLMERCURY	CHEMICAL TOXICANT		-1.134	9.46x10-3	ATF5,CD47,ECE1,ID2,LOC257642,PDCL3,RTN4
CD24	OTHER		-1.134	1.36x10-2	CDKN1A,DEPDC1B,FXR1,HMMR,LPP,PLPPR2,RASA1,RBBP6,TPR
FLT1	KINASE		-1.134	1.96x10-2	CDKN1A,FLNA,SCRN1,SMARCA4,SOX9,UBE2B,UBE2H
LPIN1	PHOSPHATASE		-1.117	2.50x10-3	CDKN1A,FASN,FDPS,HMGCR,SCD	206
miR-200B-3P (and other miRNAS W/SEED AAUACUG)	MATURE MICRORNA		-1.106	1.33x10-2	ERRFI1,JAG1,RERE,ZEB1
BCL3	TRANSCRIPTION REGULATOR		-1.103	1.69x10-2	AP1S1,CCND1,CD82,ID2,PDK4
PPARG	LIGAND-DEPENDENT NUCLEAR RECEPTOR		-1.094	8.07x10-7	ATP2A2,CAVIN2,CCND1,CCPG1,CDKN1A,CXCL2,EIF4EBP1,ELOVL6,FASN,FDPS,GABARAPL2,GAK,HMGCR,IGFBP5,INSIG1,INSIG2,IRS2,KLF6,LDLR,MLYCD,MMP14,MRTO4,MYOG,NR2F2,PDK4,PLA2G2A,PLAC1,PPIC,SCD,SDC1,SERPINE1,SGK1,SLC44A1,SOCS3,SPP1,STXBP5,TRAF6,UCP2,VCAM1	261
MIFEPRISTONE	CHEMICAL DRUG		-1.094	3.07x10-2	CCND1,CD14,CDKN1A,CLU,CTNNA1,DUSP1,FDFT1,FTH1,GAS6,HSPA4,IRS2,LAMC2,LDLR,PTGIS,SERPINE1,SPP1,TIMP3
DDX5	ENZYME		-1.092	5.11x10-3	CCND1,CDKN1A,NFAT5,S100A4	299
CERIVASTATIN	CHEMICAL DRUG		-1.092	2.09x10-2	CDKN1A,CYP1B1,FDPS,HMGCR,IDI1,SERPINE1,VCAM1
HEY1	TRANSCRIPTION REGULATOR		-1.091	7.29x10-3	CDKN1A,MYOG,NR2F2,SMTN	177
MYCN	TRANSCRIPTION REGULATOR		-1.079	1.99x10-4	ABCA7,ABCC1,CCND1,CCND2,CDKN1A,CLU,COL4A1,CTDNEP1,DPYSL3,EIF3C,ID2,INHBA,ITGA3,ITGB1,KDM5B,MXI1,NBN,NUCB1,PHGDH,SERPINE1,TM6SF1,TMED9,ZYX	279
RARA	LIGAND-DEPENDENT NUCLEAR RECEPTOR		-1.069	2.10x10-2	ADAM10,ARNT2,ATF5,CCND1,CCPG1,CD14,CD44,CDKN1A,CYP7A1,DUSP1,ENY2,MMP11,PIMREG,PLXNA2,SPP1,STAT1,TFAP2A,TNFRSF11B,UBE2T
TRPC1	ION CHANNEL		-1.067	6.14x10-4	CCND1,CCND2,CDKN1A,MYOG	200
HBEGF	GROWTH FACTOR		-1.067	7.01x10-3	CCND1,CCND2,ITGB1,PDK4,ZEB1	218
SPRY2	OTHER		-1.067	1.16x10-2	CDKN1A,EPHB4,ID2,ISG15
PRKCI	KINASE		-1.067	1.72x10-2	CCND1,CXCL2,FASN,SF3B1
AGTR2	G-PROTEIN COUPLED RECEPTOR		-1.067	1.72x10-2	FASN,MYLPF,MYOG,ZEB1
JAG1	GROWTH FACTOR		-1.067	1.72x10-2	CCND1,CDKN1A,NR2F2,SPP1
RXR	GROUP		-1.067	3.10x10-2	ADAM10,CDKN1A,CYP7A1,INSIG1,MMP11,PDK4,SERPINF1,SPP1
E2F	GROUP		-1.067	3.55x10-2	CCNB1,CSDE1,ITGA6,ITGB1,MFAP1,SERPINE1,TMEM126B,TTK,UXT
NGF	GROWTH FACTOR		-1.037	1.68x10-2	AGRN,BCL2L11,CCND1,CDKN1A,DUSP1,ELK1,LDLR,SHC1,SLC18A3,SORT1,STAT3,TFAP2A,YES1
ACKR3	G-PROTEIN COUPLED RECEPTOR		-1.029	1.72x10-6	AKR1C3,AXL,CCNB1,CCND1,CDKN1A,CFH,CXCL12,MMP14	242
LGALS3	OTHER		-1.029	1.24x10-3	CCND1,CDKN1A,COL4A1,FSCN1,IGFBP5,ITGA6,ITGB1,PLEK2,SOCS3,VCAM1	245
HGF	GROWTH FACTOR		-1.02	5.07x10-5	AKAP12,ASNS,CCND1,CD28,CD44,CDKN1A,COL4A1,CXCL2,CYR61,DYRK1A,ERRFI1,FLNA,GAK,HMMR,IL6ST,INHBA,INPPL1,INSIG1,ISG15,ITGA6,ITGB1,LAMC2,LDLR,MMP14,PLXNA2,PSMC3IP,SERPINE1,SGK1,SOCS3,SPP1,TGFB2,TIMP3,TMEM97,TTK,VCAM1,ZEB1	267
ROCK1	KINASE		-1.015	1.66x10-3	CCND1,CCND2,CD44,VCAM1	222
GPS2	TRANSCRIPTION REGULATOR		-1.009	7.26x10-3	CCND1,CDKN1A,CYP7A1,SGK1,SLC44A1,VCAM1	111
NPC2	OTHER		-1	3.42x10-3	AKR1C3,CREB5,STAT1,STAT3	165
GW7647	CHEMICAL DRUG		-1	1.00x10-2	ABCC1,IGFBP5,MLYCD,PDK4
STAT5A/B	GROUP		-1	1.69x10-2	BCL2L11,CCND2,CDKN1A,DUSP1,ID2,IDI1,NIFK,SOCS3
RPSA	TRANSLATION REGULATOR		-1	2.18x10-2	DUSP1,ISG15,ITGA6,STAT1
GJA1	TRANSPORTER		-1	2.70x10-2	CCND1,CDKN1A,SPP1,TNFRSF11B
MAPK3	KINASE		-1	4.02x10-2	BCL2L11,CCND1,ITGB1,LEPROTL1,MYRF,SPP1
EGR1	TRANSCRIPTION REGULATOR		-0.99	1.89x10-6	ATP2A2,BCL2L11,CCND1,CCND2,CD44,CDKN1A,CLU,CXCL2,EIF4EBP1,ELK1,HMGCR,KCNT1,LDLR,MMP14,SERPINE1,SGK1,SLC12A2,SLC4A2,SPP1,SQLE,VCAM1	350
LIMS1	OTHER		-0.975	1.04x10-4	BCL2L11,CTNNA1,ITGB1,TGFB2
10E,12Z-OCTADECADIENOIC ACID	CHEMICAL - ENDOGENOUS MAMMALIAN		-0.958	4.05x10-4	ACSS2,CREB5,FADS1,FASN,IL6ST,LDLR,NFAT5,SCD,UCP2	154
miR-8	MICRORNA		-0.954	3.18x10-2	CBL,CD47,ERRFI1,FTH1,ITGB1,TGFB2,ZEB1
FGF21	GROWTH FACTOR		-0.943	2.23x10-2	FASN,IRS2,LDLR,LEPROTL1,SERPINE1
RAC1	ENZYME		-0.932	2.71x10-5	CCND1,DUSP1,GSN,IL33,ITGA6,ITGB1,MMP14,MYOG,NF2,SHC1,SOX9,STAT1,STAT3,VCAM1	195
TESTOSTERONE	CHEMICAL - ENDOGENOUS MAMMALIAN		-0.919	2.24x10-3	ATP1B1,CCND1,CDKN1A,CLCN3,CLU,CYP51A1,EIF2S1,HMGCR,HSPA1A/HSPA1B,ID3,INHBA,IRS2,ITGB1,MYOG,PXN,RALA,Rhox5,SDC1,STAT3,TGFB2,TNFRSF11B,UBE2B,VCAM1	324
MTORC1	COMPLEX		-0.916	3.34x10-4	CCND1,FASN,FDPS,HMGCR,IDI1,INSIG1,MAG,SCD	257
LACTACYSTIN	CHEMICAL - PROTEASE INHIBITOR		-0.915	8.55x10-5	ASNS,CBL,CCND1,CCND2,CDKN1A,CFL1,DUSP1,EBNA1BP2,IFRD1,IGFBP5,IRS2,LDLR,MMP11,MRTO4,PRKCA,PXN,SLC3A2,SUB1,TCERG1	243
HYDROGEN PEROXIDE	CHEMICAL - ENDOGENOUS MAMMALIAN		-0.914	1.30x10-6	ATXN7L3B,BCL2L11,BSG,CCNB1,CCND1,CD81,CDKN1A,CLU,CUX1,CYP51A1,DHCR7,DUSP1,DUT,ETS2,FASN,FDFT1,FDPS,Flt1,FOXO4,FTH1,GSTM3,HMGCR,ID3,INSIG1,ITGA6,LDLR,MSMO1,OAZ2,PDCD4,PKIA,RALBP1,SC5D,SERPINE1,SGK1,SHC1,SPP1,SQLE,STAT3,UCP2,VCAM1	290
miR-7A-5P (and other miRNAS W/SEED GGAAGAC)	MATURE MICRORNA		-0.912	4.21x10-3	IRS2,KMT5A,SLC3A2,SYNE1
IL4	CYTOKINE		-0.907	1.18x10-4	ACOT9,ADAM19,AUH,CCND2,CD14,CD44,Cdc42,CDKN1A,CLCN3,COL6A3,CTNNA1,CXCL2,EBNA1BP2,EEA1,EIF2S1,EPHB4,HIPK2,HMGCR,HSPA1A/HSPA1B,IFNAR1,IL33,IL6ST,IRF7,ISG15,ITGB1,ITPA,JAG1,JAK2,KDM5A,KLF6,LGALS3,MAPK3,MVK,MYOG,PMVK,PPP6C,PRR3,Scd2,SERPINE1,SOCS3,SPP1,STAT1,STAT6,TGFBI,TIMP3,TM7SF2,TNFRSF11B,TXLNA,UCHL3,VCAM1	248
L-DOPA	CHEMICAL - ENDOGENOUS MAMMALIAN		-0.905	1.08x10-4	ABCA7,ADAR,ATG16L1,ATP2A2,AXL,C1GALT1C1,CACNB2,CCND1,COL4A1,COTL1,CXCL12,DAAM1,DIXDC1,DUSP1,ECE1,EIF4EBP2,ETS2,FCGRT,FDPS,IGFBP5,KARS,KDM5B,KLF6,LPP,MMP14,MPP6,MSMO1,MVB12A,OAZ2,PDCD4,PKIA,PPM1L,PSMC3IP,PTGIS,RAB3D,RC3H2,SCRN1,SHC1,SOX9,SUB1,SYNE1,TRIM25,WRB,ZEB1	213
FLUTICASONE PROPIONATE	CHEMICAL DRUG		-0.905	1.00x10-2	C8orf44-SGK3/SGK3,CXCL2,FSCN1,IRS2,OLFML2B,PDK4,SERPINE1,SERPINF1,SIGLEC10,SLC1A3,SPP1,STAT1,TIMP3
CALYCULIN A	CHEMICAL TOXICANT		-0.896	5.39x10-5	CCND1,CCND2,CDKN1A,CYP1B1,NR2F2,PRKCA	281
METHYL-BETA-CYCLODEXTRIN	CHEMICAL DRUG		-0.896	1.66x10-4	CCND1,FDFT1,HMGCR,LDLR,PLA2G2A,SERPINE1	297
LGALS1	OTHER		-0.896	8.03x10-3	CCNB1,CCND2,CDKN1A,CXCL2,LGALS3,SERPINE1	307
SPARC	OTHER		-0.895	4.34x10-2	AKR1C3,FOXQ1,HAT1,LOXL4,NOTCH2,SERPINE1,SOX9,TRIM25
CDK9	KINASE		-0.882	4.15x10-2	CCNB1,CCND2,CDKN1A,CXCL2,PDK4
D-GLUCOSE	CHEMICAL - ENDOGENOUS MAMMALIAN		-0.866	2.97x10-7	ART3,ASNS,ATF5,ATP2A2,BCL2L11,C8orf44-SGK3/SGK3,CBL,CCNB1,CCND1,CCND2,CCPG1,CDKN1A,CLU,COL4A1,CXCL2,CYP7A1,DYRK1A,ELOVL6,FASN,FKBP2,HMGCR,HPRT1,IL6ST,IRS2,ITGB1,JAG1,LDLR,MID1IP1,MMP14,PDCD4,PTGIS,PYCR1,S100A4,SCD,Scd2,SERPINE1,SGK1,SHC1,SLC1A3,SLC3A2,SOX9,SPP1,SSR1,UCP2,VCAM1	318
LET-7A-5P (and other miRNAS W/SEED GAGGUAG)	MATURE MICRORNA		-0.865	1.22x10-3	BSG,CCND1,CCND2,CSDE1,DHX57,EIF3J,GAK,IFRD1,NF2,PXDN,S100A4,SCD,SMC1A,STAT3
ESR2	LIGAND-DEPENDENT NUCLEAR RECEPTOR		-0.863	4.16x10-4	AKAP12,ANK1,ANXA4,ARNT2,ATF5,CCND1,CDKN1A,CHST2,CXCL12,DHCR7,FASN,FOXQ1,HSD17B7,ITGB1,JAG1,LOXL4,MMP14,PDK4,PLAC1,PSAT1,PTGIS,PYCR1,RALA,SGK1,SMOC1,SOCS3,SOX4,SPP1,TNS3,WISP2	343
EICOSAPENTENOIC ACID	CHEMICAL DRUG		-0.863	1.08x10-2	CD44,ECH1,FADS1,LDLR,PDK4,SERPINE1,TGFB2,UBE2B
FATTY ACID	CHEMICAL - ENDOGENOUS MAMMALIAN		-0.862	8.31x10-3	CYP7A1,CYR61,FADS1,FASN,LDLR,SCD,SERPINE1,UCP2,VCAM1	243
LH	COMPLEX		-0.853	7.71x10-4	ACTN1,AKAP12,ATP2A2,AXL,CCND2,DAB2,DHCR7,DUSP1,FDX1,ITGA3,MSMO1,PRKX,RAB31,RAB33B,RAB5C,SGK1,SMARCA4,STAT1,TGFB2,TNFRSF11B	294
PRKAA1	KINASE		-0.853	2.80x10-3	CDKN1A,COX4I1,CXCL12,Gsta4,HIGD1A,MLYCD,NFIB,SOCS3,VCAM1,ZYX	242
CR1L	OTHER		-0.849	2.70x10-2	COL4A1,COL4A2,COL6A3,SERPINE1
CREB1	TRANSCRIPTION REGULATOR		-0.838	3.84x10-4	ATF5,CACNA2D1,CCNB1,CCND1,CDKN1A,CSRP2,CXCL2,CYP51A1,CYR61,DUSP1,ERRFI1,FASN,GALNT1,HMGCR,HSPA4,IDI1,INHBA,IRF7,IRS2,LDLR,LSS,MSMO1,MTSS1,MVD,MVK,NRP2,PAM,PLXNA2,SCD,SGK1,SMAD6,SMS,SRPK2,STAT3,TCEAL9,TFAP2A,TIPARP	280
NITRIC OXIDE	CHEMICAL - ENDOGENOUS MAMMALIAN		-0.828	6.48x10-4	CCND1,CD44,CDKN1A,CXCL12,DAG1,DPYSL3,DUSP1,ECE1,FTH1,HPRT1,NID1,RAD23B,SGK1,SPP1,TIMP3	287
BEZAFIBRATE	CHEMICAL DRUG		-0.827	6.74x10-4	CCNB1,COX4I1,CYP7A1,ECH1,FASN,INSIG1,LGALS3,PDK4,SCD,SERPINE1,UCP2	147
miR-29B-3P (and othermiRNAS W/SEED AGCACCA)	MATURE MICRORNA		-0.82	2.75x10-2	BCL2L11,COL4A1,COL4A2,INSIG1,PPIC,RERE
EFNA2	KINASE		-0.816	1.64x10-2	CUX1,FOXQ1,IRF7,KRT7,PXN,SOX9
HOXD10	TRANSCRIPTION REGULATOR		-0.816	2.56x10-2	CD44,ITGA3,LSM6,MMP14,SERPINE1,TGFB1I1
PALMITIC ACID	CHEMICAL - ENDOGENOUS MAMMALIAN		-0.811	1.31x10-2	BCL2L11,CDKN1A,CXCL2,ELOVL6,FASN,IRS2,PDK4,SCD,SERPINE1,SOCS3,SORT1,UCP2,VCAM1
LITHIUM CHLORIDE	CHEMICAL DRUG		-0.808	3.60x10-2	BSG,CCND1,CD44,CDKN1A,FSCN1,MYOG,PXN,SOX9
TGFBR2	KINASE		-0.803	1.18x10-3	CCND1,CD14,CD44,CDKN1A,CLU,CXCL2,GGA3,LBR,MMP14,NFIB,SERPINE1,SOCS3,SPP1,STAT3,TGFB2,TNFRSF11B	298
NFKB2	TRANSCRIPTION REGULATOR		-0.796	4.02x10-2	BCL2L11,CCND1,CDKN1A,CXCL12,PXN,VCAM1
TRIBUTYRIN	CHEMICAL DRUG		-0.788	2.25x10-3	AKAP12,CDKN1A,CYR61,DUSP1,ID2,ID3,INHBA,PDLIM5
OKADAIC ACID	CHEMICAL TOXICANT		-0.786	4.41x10-3	BCL2L11,CCND1,CCND2,CXCL2,CYP1B1,NR2F2,PRKCA,RASA1,SPP1	297
miR-24	MICRORNA		-0.784	3.96x10-2	BCL2L11,CDKN1A,SERPINE1,SLC4A1
TGF BETA	GROUP		-0.773	6.32x10-6	CCND1,CCND2,CDKN1A,CLU,CXCL2,CYR61,DAB2,FSCN1,FSTL1,IGFBP5,ITGB1,JAG1,MMP11,NFAT5,PMEPA1,RNF111,RORA,SERPINE1,SOCS3,SPP1,TGFBI,TIMP3,TNFRSF11B,VCAM1	300
SMAD4	TRANSCRIPTION REGULATOR		-0.767	3.84x10-2	CCND1,CCND2,CDKN1A,FSCN1,ID2,ITGA6,ITGB1,JAG1,SCD,SERPINE1,SGK1,SMAD6,TGFB2,TIMP3
PRKCB	KINASE		-0.762	4.24x10-3	CCND1,CDKN1A,CYP7A1,FASN,IRS2,MYLPF,SERPINE1	293
BGN	OTHER		-0.762	1.00x10-2	CCND1,MMP14,SERPINE1,WISP1
ZEB1	TRANSCRIPTION REGULATOR		-0.762	2.43x10-2	CXADR,LAMC2,NRP2,SERPINE1,XDH
LRP1	TRANSMEMBRANE RECEPTOR		-0.762	3.62x10-2	C1R,C1S,ITGB1,SERPINF1
NOTCH	GROUP		-0.756	1.77x10-3	CDKN1A,DUSP1,ID2,ID3,JAG1,Nes,SMAD6,WISP1,ZEB1	233
ETHANOL	CHEMICAL - ENDOGENOUS MAMMALIAN		-0.755	1.06x10-3	CCND1,CD14,CDKN1A,CLU,DDR2,DUSP1,DYRK1A,FASN,Gsta4,IRF7,JAK2,KLF6,LSS,MAG,NSDHL,RAB3D,RORA,SCD,SERPINE1,SGK1,SPTBN1,SQLE,STAT1,STAT3,TGFB2,VCAM1	288
IGFBP3	OTHER		-0.747	3.62x10-2	CDKN1A,SERPINE1,STAT1,VCAM1
GSK3	GROUP		-0.746	5.51x10-3	BCL2L11,CCND1,FASN,FSCN1,HMGCR,LDLR,SPP1,STAT1	280
APP	OTHER		-0.738	3.41x10-7	ATP1B1,AXL,BCL2L11,BSG,C1R,C1S,CCND1,CCND2,CD151,CD44,CD82,CFL1,CHRM4,CLU,CSNK2A2,CXCL12,CXCL2,DBN1,DYRK1A,ECH1,ERMP1,ETS2,FKBP1A,FLNA,Gsta4,GSTM3,HIPK2,HMGCR,HSPA1A/HSPA1B,IGFBP5,IL6ST,INHBA,IRF7,IRS2,ITGA3,ITGA6,LDLR,LGALS3,MAP6,MMP14,MXI1,NBR1,NCDN,Nes,NRP2,PDCD4,PRKCA,SEPT7,SERPINE1,SERPINF1,SHC1,SLC25A38,SMARCA2,SMARCA4,SOCS3,SOX9,STAT3,STAT6,TRAF6,TUBA8,TUBB6,VCAM1	288
SCP2	TRANSPORTER		-0.736	4.21x10-3	BSG,CYP7A1,HMGCR,LDLR	140
ZFP36	TRANSCRIPTION REGULATOR		-0.728	3.34x10-2	AHRR,CDKN1A,CXCL2,SPP1,SPRYD7,VCAM1
miR-30C-5P (and other miRNAS W/SEED GUAAACA)	MATURE MICRORNA		-0.711	6.01x10-3	ATP2A2,CDCP1,GALNT1,IFRD1,IRS2,KRT7,NUCB1,NUFIP2,PRPF40A,RAD23B
HNF1B	TRANSCRIPTION REGULATOR		-0.711	1.03x10-2	ACTN1,ANXA4,CD44,DUSP1,ID3,ITGA3,JAG1,PLEK2,PTGIS,S100A4
PHORBOL 12,13-DIBUTYRATE	CHEMICAL - ENDOGENOUS NON-MAMMALIAN		-0.702	7.94x10-3	CCND2,CDKN1A,PRKCA,SERPINE1,SPRY4	209
ANISOMYCIN	CHEMICAL - ENDOGENOUS NON-MAMMALIAN		-0.7	1.28x10-2	CDKN1A,DUSP1,LDLR,SDC1,SERPINE1,SPP1
HYDROXYUREA	CHEMICAL DRUG		-0.68	2.22x10-2	CCNB1,CCND1,CCND2,CDKN1A,HJURP,STAT1
CEBPA	TRANSCRIPTION REGULATOR		-0.67	1.75x10-4	AKAP12,AKR1C3,ASNS,BTG1,CCND2,CD14,CDKN1A,COX4I1,CTNNA1,CYP7A1,DHCR7,FASN,GGH,HMGCR,ID2,IRS2,ISG15,KRT7,MYOG,NF2,PGD,RAB31,RORA,SCD,SERPINB1,SERPINE1,SERPINF1,SOCS3,SPP1,TFAP2A,TGFB2	293
TSH	COMPLEX		-0.665	2.94x10-2	CCND1,CDKN1A,DAG1,FTH1,IGFBP5,SOCS3
LINOLEIC ACID	CHEMICAL - ENDOGENOUS MAMMALIAN		-0.659	3.60x10-3	CD47,CLU,DUSP1,FASN,LDLR,SCD,UCP2,VCAM1	230
NCOA1	TRANSCRIPTION REGULATOR		-0.659	4.31x10-3	AGRN,CCND1,CDKN1A,CYP7A1,DDX28,Gk,MAPK8IP2,NCAPH2,PGS1,SERPINE1	308
ETS1	TRANSCRIPTION REGULATOR		-0.659	4.82x10-2	CCND1,CD14,CD44,CDKN1A,ETS2,HSPA1A/HSPA1B,ID2,INSIG1,SCAMP1,SERPINE1,SPP1,TGFB2,ZEB1
PDGF BB	COMPLEX		-0.656	4.89x10-13	AKAP12,ATP2A2,CCND1,CD44,CDKN1A,CSRP2,CXCL2,CYR61,DAB2,DBNDD1,DUSP1,EIF4G1,ETS2,FASN,FHL2,FLNA,GJA5,HMGCR,ID3,INHBA,ITGB1,KLF6,LDLR,LGALS3,MMP14,NEXN,PRRX2,PSMB4,RND3,RPN2,SCD,Scd2,SERPINA3,SERPINE1,SGK1,SOCS3,STAT3,SYNE1,UNC5B,VCAM1,XDH,Yap1	283
COL18A1	OTHER		-0.65	4.16x10-2	CCND1,EPHB4,ID3,MXI1,SERPINE1,STAT1,STAT3
9Z,11E-OCTADECADIENOIC ACID	CHEMICAL - ENDOGENOUS NON-MAMMALIAN		-0.64	1.28x10-4	FADS1,FASN,IL6ST,LDLR,NFAT5,UCP2	153
HNRNPK	TRANSCRIPTION REGULATOR		-0.64	5.01x10-4	CAVIN2,CDKN1A,ITGA6,LDLR,RASA1,UCP2	109
MEF2C	TRANSCRIPTION REGULATOR		-0.633	4.74x10-2	ATP2A2,CDKN1A,GJA5,MYLPF,MYOG,PLA2G2A,S100A4,TTN
GARCINOL	CHEMICAL - ENDOGENOUS NON-MAMMALIAN		-0.632	1.48x10-3	BAZ1A,GTF2I,HMGXB4,HNRNPUL1,KDM5B,MLLT6,PHTF1,PXDN,TAF6,TCF7L1
PACLITAXEL	CHEMICAL DRUG		-0.612	1.06x10-2	BCL2L11,CCND1,CD44,CDKN1A,CLU,CXCL2,CYP1B1,EEF1E1,FLNA,GRINA,ITGA3,ITGA6,KDSR,PHGDH,SCN1B,SLC12A2,STAT3,SVIL,TFAP2A
VCAN	OTHER		-0.608	1.69x10-9	AGRN,C1R,C1S,CBX6,CDKN1A,CLU,CXCL12,CXCL2,DAG1,GPC6,ITGA3,ITGB1,LGALS3,LOXL4,OLFML2B,PAM,PLA2G2A,PTGIS,SMOC1,SORT1,SPATS2L,VCAM1	217
SKI	TRANSCRIPTION REGULATOR		-0.606	7.29x10-3	CDKN1A,MYOG,Nes,SERPINE1	175
PIK3CA	KINASE		-0.6	3.16x10-4	CCNB1,CCND1,CD14,CD44,FASN,IRS2,ITGB1,JAG1,SERPINE1	272
PCGEM1	OTHER		-0.6	2.89x10-3	FASN,LSS,MLYCD,OGDH,PDK4,PGD
PAX3	TRANSCRIPTION REGULATOR		-0.594	3.09x10-4	ASNS,CD151,CDKN1A,CLU,CYP1B1,DBN1,EIF2S1,FKBP1A,ID2,ID3,MYOG,PHGDH,PKIA,PXDN,RAB31,SOX4,TGFB2,TIMP3	210
PRKCE	KINASE		-0.589	4.67x10-3	CCND1,CDKN1A,CYR61,IL6ST,LDLR,PDCD4,STAT3,VCAM1	277
GSK3B	KINASE		-0.584	4.14x10-2	ATP2A2,CCND1,CD82,CDKN1A,IFT27,IRS2,SERPINE1,SPP1
FOXM1	TRANSCRIPTION REGULATOR		-0.581	1.22x10-2	CCNB1,CCND1,CCND2,CDKN1A,CXCL12,CYP7A1,NBN,Nes,STAT3,ZEB1
CTGF	GROWTH FACTOR		-0.574	1.36x10-2	CAVIN2,CCND1,CD44,COL4A2,HSD17B7,MMP14,SERPINE1,SOX4,TIMP3
BDNF	GROWTH FACTOR		-0.566	6.60x10-5	AGRN,BCL2L11,CCND1,CCND2,CDKN1A,CYR61,DPYSL3,DUSP1,ELOVL6,FLNA,FSCN1,GAS6,HMGCR,HSD17B12,IFRD1,MAG,MVD,MYOG,NCDN,PALMD,PDLIM5,PLXNB2,PRKAR1B,SPP1,TIPARP,TNFRSF11B	279
SULFORAFAN	CHEMICAL DRUG		-0.562	4.21x10-2	AOX1,CCNB1,CCND1,CD44,CDKN1A,PGM3,SOCS3,VCAM1,ZEB1
NPC1	TRANSPORTER		-0.559	1.30x10-4	CYP7A1,HMGCR,LDLR,LGALS3,MMP14,SCD,STAT1,STAT3	221
MYOC	OTHER		-0.555	1.24x10-3	CD44,DAB2,DAG1,EBF3,FSCN1,IGFBP5,ITGB1,NBN,PXDN,SPP1	215
8-BROMOGUANOSINE 3',5'-CYCLIC MONOPHOSPHATE	CHEMICAL - KINASE INHIBITOR		-0.555	6.16x10-3	ADAM10,CDKN1A,PCCA,SOD3,VCAM1	232
MYOD1	TRANSCRIPTION REGULATOR		-0.546	1.25x10-6	ATP7A,CDH15,CDKN1A,COL4A1,DAG1,DUSP1,DYSF,EIF3E,FSTL1,ID2,IGFBP5,KLF6,MYLPF,MYOG,Nes,PMEPA1,PSMB4,SLC12A2,SPTBN1,TNNC2,TTN,ZEB1	246
F7	PEPTIDASE		-0.537	5.38x10-3	CXCL2,CYR61,JAG1,PAPOLA,RND3	161
OLEIC ACID	CHEMICAL - ENDOGENOUS MAMMALIAN		-0.514	6.81x10-3	CLU,DUSP1,FASN,HMGCR,LDLR,PDK4,SCD,SERPINE1,UCP2,VCAM1	237
ABCB4	TRANSPORTER		-0.512	4.68x10-3	COL4A1,LGALS3,SERPINE1,SPP1,TGFB2
MET	KINASE		-0.508	1.03x10-3	CCND1,CCND2,CD44,CDKN1A,DAB2,INHBA,ITGA3,ITGB1,MYOG,SOCS3,SPP1	245
PLG	PEPTIDASE		-0.505	1.71x10-2	CNN2,CYR61,MXI1,PIP5K1A,RALA,SERPINE1,TNFRSF11B
CYCLOSPORIN A	BIOLOGIC DRUG		-0.499	4.80x10-6	APOD,ASNS,BCL2L11,CBLB,CCND1,CD14,CD44,CDKN1A,CLU,COL4A2,CYP7A1,FASN,FDFT1,FLNA,Flt1,GSTM3,HMGCR,ID3,LAMC2,LBR,LDLR,LGALS3,MMP14,NFAT5,PAM,PDCD4,PRKCA,Rcan1,SCD,SDCBP,SERPINE1,SMTN,SPP1,TRA2A,TTN,VCAM1	271
1,2-DITHIOL-3-THIONE	CHEMICAL REAGENT		-0.495	3.67x10-3	DHCR7,EIF2S1,EIF3C,EIF3E,EPHB4,FTH1,Gsta4,HPRT1,MSMO1,NARS,NBR1,NUCB2,PSAT1,PSMB4,SERPINA3,UBQLN2	55
GEMFIBROZIL	CHEMICAL DRUG		-0.494	1.95x10-4	CCND1,ECH1,Hmgn2 (includes others),LDLR,NBN,PDCD4,RTN4,SCD,SERPINE1,SOCS3	283
COLLAGEN TYPE I	COMPLEX		-0.492	2.49x10-3	CCND1,EIF4EBP1,Flt1,ITGA3,ITGB1,MMP14,PRRX1,PRRX2	246
HLX	TRANSCRIPTION REGULATOR		-0.492	6.16x10-3	CCNB1,CD44,CYP1B1,ELK1,UNC5B
9,10-DIMETHYL-1,2-BENZANTHRACENE	CHEMICAL TOXICANT		-0.492	2.86x10-2	CCND1,CDKN1A,CXCL2,CYP1B1,SERPINE1
GLI1	TRANSCRIPTION REGULATOR		-0.461	1.56x10-2	CCND1,CCND2,CDKN1A,CLU,ID2,INSIG1,MMP11,NR2F2,SOX9,SPP1,SYNE1,TIMP3,ULK1,USP7
RAF1	KINASE		-0.451	4.62x10-3	AKAP12,BCL2L11,BTG1,CCND1,CD44,CDC42EP1,CDKN1A,ELK1,ID3,ITGB1,NOP56,RND3,SDC1,SQLE,Tpm3,WISP2	271
SMAD2/3-SMAD4	COMPLEX		-0.45	2.74x10-4	CDKN1A,IGFBP5,IRF7,SERPINE1	78
AMITRIPTYLINE	CHEMICAL DRUG		-0.447	1.75x10-3	ASAH1,CCND2,CDKN1A,LSS,SERPINA3	152
NITROFEN	CHEMICAL TOXICANT		-0.447	2.12x10-2	FOXQ1,ITGA6,RTN4,TGFB1I1,TIMP3
HNF4A	TRANSCRIPTION REGULATOR		-0.446	6.83x10-12	ACAD8,ACSS2,ACTN1,ACTR1A,ACTR3,AJUBA,AKR1C3,ANKHD1/ANKHD1-EIF4EBP3,AP1M1,ARHGAP11A,ASAH1,ATG3,ATP6V0C,ATP7A,BAZ1A,BTG1,C11orf54,C14orf1,C1orf123,C1S,CCNB1,CCND1,CDKN1A,CHERP,COPS7A,CTDNEP1,CXADR,CYP1B1,CYP51A1,CYP7A1,DAG1,DCAF8,DDX28,DNAL1,DPM1,DUSP19,DYNC1LI1,EIF4EBP2,EIF4G1,FAM53C,FDPS,FDX1,FKBP10,FLNA,FTH1,FYCO1,GBF1,GOLGA4,GPC6,GSN,GTF2I,IFNAR1,IL6ST,INHBA,ITGA6,KARS,KRT7,LDLR,LGALS3,MAPK8IP2…
CD40LG	CYTOKINE		-0.44	2.30x10-5	AKAP2,ATF5,AUH,BTG1,CD44,CDKN1A,CLU,CXCL2,CYP1B1,DUSP1,EIF2S1,FSCN1,HSPA1A/HSPA1B,ID2,ID3,INHBA,ISG15,ITPA,JAK2,MMP11,MMP14,NEFH,PMVK,PRR3,RASA1,SERPINE1,STAT1,STAT3,TM7SF2,TNFRSF11B,UCHL3,VCAM1	239
SHC1	OTHER		-0.44	4.15x10-2	BCL2L11,CDKN1A,FTH1,KRT7,SERPINE1
KLF2	TRANSCRIPTION REGULATOR		-0.438	1.15x10-3	CDKN1A,COL4A1,CXCL2,CYP1B1,ID3,MMP14,PTGIS,RALA,SERPINE1,SOX9,STAT1,TGFB2,TRAF6,VCAM1	224
FGF10	GROWTH FACTOR		-0.431	5.78x10-4	CYP1B1,CYP51A1,LDLR,LSS,MMP14,SCD,SOX9,TIMP3
DINOPROST	CHEMICAL - ENDOGENOUS MAMMALIAN		-0.426	8.38x10-5	ANXA4,ATP2A2,CCND1,CCND2,HSPA1A/HSPA1B,HSPA4,ID2,ID3,SCN1B,SPP1,TIMP3	257
PRKAA2	KINASE		-0.426	4.34x10-2	CDKN1A,COX4I1,CXCL12,FASN,Gsta4,HIGD1A,NFIB,ZYX
NKX2-3	TRANSCRIPTION REGULATOR		-0.419	9.66x10-4	AGAP3,ASNS,BTG1,CAVIN2,CXADR,GNG12,HMMR,PHGDH,PKIA,PLA1A,PSAT1,SERPINE2,SRPX2,STAT1,TIPARP,VCAM1,WRB,ZNFX1
MTPN	TRANSCRIPTION REGULATOR		-0.41	2.74x10-3	APOD,CCNB1,CCND1,CCND2,GAS6,SERPINE1,SPP1,TGFB2,VCAM1	223
VEGF	GROUP		-0.398	8.88x10-3	ADAM10,AKAP12,ASNS,BCL2L11,CD44,CXCL12,CYR61,FLNA,HMMR,IL6ST,INHBA,INSIG1,ITGA6,ITGB1,LDLR,MMP14,NR2F2,PABPN1,PLXNA2,PSMC3IP,SGK1,SOCS3,STAT3,TCF23,TNFRSF11B,TTK,VCAM1,XDH,ZEB1	285
ESTROGEN RECEPTOR	GROUP		-0.396	6.32x10-6	AGO1,AXL,CCND1,CCND2,CD44,CDH15,COL4A1,COL4A2,CXCL12,HSPA1A/HSPA1B,ITGA3,ITGB1,JAG1,KRT7,LAMC2,LDLR,MMP14,PLEK2,SERPINE1,SMAD6,TGFB2,TIMP3,TMEFF1,ZEB1	311
BORTEZOMIB	CHEMICAL DRUG		-0.394	2.44x10-2	BCL2L11,CCNB1,CCND1,CCND2,CDKN1A,CXCL12,CXCL2,HSPA1A/HSPA1B,IL33,IL6ST,PSMB4,SDC1,SERPINA3,VCAM1,WISP2
H-7	CHEMICAL - KINASE INHIBITOR		-0.391	1.541x10-2	ECE1,ISG15,ITGB1,SERPINE1,STAT3
PKA	COMPLEX		-0.389	1.38x10-3	CCNB1,CD14,CD44,CDKN1A,CYP51A1,DUSP1,HMGCR,KLF6,LDLR,SGK1,SLC1A3,SOX9,TNFRSF11B	191
ACOX1	ENZYME		-0.389	1.52x10-2	CDKN1A,COL4A2,CXCL12,ETS2,FASN,KLF6,LGALS3,PALMD,PDK4,SGK1,UCP2
HSPA5	ENZYME		-0.388	3.29x10-3	CD47,CLU,FASN,ID2,IDI1,SCD	122
SRC	KINASE		-0.38	2.39x10-3	CBL,CCND1,CCND2,CDKN1A,DUSP1,LDLR,MYOG,PRKCA,SPP1,STAT3,VCAM1	264
SHH	PEPTIDASE		-0.38	2.40x10-2	ATF5,CCND1,CCND2,DAAM1,EPHB4,IGFBP5,NR2F2,PSMC3IP,SERPINE1,SOX9,SPP1,TGFB2
FGF8	GROWTH FACTOR		-0.368	4.83x10-2	CCND1,ERRFI1,SHC1,SPP1,SUB1,TM7SF2,TNFRSF11B
PPARA	LIGAND-DEPENDENT NUCLEAR RECEPTOR		-0.366	1.35x10-11	ACSS2,ADAM10,ASNS,C1R,C1S,CCNB1,CCND1,CDKN1A,CFH,COX4I1,CXCL12,CYP51A1,CYP7A1,DHCR7,ECH1,ELOVL6,FADS1,FASN,FDFT1,FDPS,FITM1,Gk,Gsta4,GSTM3,H2AFZ,HMGCR,Hmgn2 (includes others),IDI1,IFITM3,IGFBP5,INSIG1,INSIG2,LSS,MLYCD,MSMO1,MVD,MVK,NSDHL,PDK4,PLA2G2A,PMVK,RTN4,SC5D,SCAMP1,SCD,SQLE,UCP2,VCAM1	179
FOXO4	TRANSCRIPTION REGULATOR		-0.362	5.03x10-11	BCL2L11,CCND1,CCND2,CDKN1A,CYP51A1,ELOVL6,FASN,FDFT1,HMGCR,IDI1,JAG1,SCD,Scd2,SERPINE1,SGK1	247
JUN	TRANSCRIPTION REGULATOR		-0.345	1.43x10-7	AKAP12,ASNS,AXL,BCL2L11,BTG1,CCND1,CCND2,CD14,CD44,CDKN1A,CLU,CYP1B1,CYP7A1,CYR61,DUSP1,FTH1,GAS6,ID2,IRS2,ITGB1,LGALS3,MAPK3,MVD,MXI1,MYLPF,NEFH,PXDN,RASA1,SCD,SDC1,SERPINE1,SGK1,SOCS3,SPP1,Srrm1,STAT1,STAT6,SVIL,VCAM1,ZEB1	342
PTTG1	TRANSCRIPTION REGULATOR		-0.343	6.16x10-3	CCNB1,CCND1,CD44,CDKN1A,UBE2B	281
NIACINAMIDE	CHEMICAL - ENDOGENOUS MAMMALIAN		-0.342	2.80x10-3	CD14,CDKN1A,CXCL12,FASN,H2AFZ,PDK4,SHC1	226
CAV1	TRANSMEMBRANE RECEPTOR		-0.339	1.84x10-2	BCL2L11,CCND1,CD14,CDKN1A,HSD17B12,KRT7,RALA,SERPINE1,SLC12A2,ST6GALNAC4
THRB	LIGAND-DEPENDENT NUCLEAR RECEPTOR		-0.337	2.00x10-4	ATP2A2,CCNB1,CCND1,CCND2,CXCL2,CYP7A1,FASN,FDPS,FSTL1,GSN,LDLR,MAPK3,PAM,PDK4,PGD,PLA2G2A,SERPINE1,TGFBI,WISP1	277
MMP3	PEPTIDASE		-0.333	1.36x10-2	ADAR,AJUBA,CSTF3,PAPOLA,SAFB,SF3B1,SNRNP48,SRPK2,Srrm1
GROWTH HORMONE	GROUP		-0.332	7.84x10-3	CCND1,CCND2,CLDN15,CYP7A1,FASN,IGFBP5,LDLR,PDK4,SGK1,SOCS3,SPP1	218
CREBBP	TRANSCRIPTION REGULATOR		-0.331	3.61x10-5	AHI1,AKAP12,CBL,CCND1,CCND2,CD44,CDKN1A,CXCL12,CYP7A1,CYR61,DUSP1,FDPS,FDX1,FNDC3B,GRAMD2B,IL17RE,ISG15,ITGA6,LDLR,MBTPS1,MFHAS1,MMP11,RASA3,SDC1,SERPINA3,SERPINE2,SMOC1,SOCS3,TIPARP,TUBA8,VCAM1	228
SODIUM ARSENITE	CHEMICAL DRUG		-0.323	1.28x10-2	ABCC1,CCND1,CDKN1A,FTH1,HSPA4,SOCS3
NDRG1	KINASE		-0.322	3.29x10-2	BCL2L11,CCND1,CD82,CXCL2
SPHK1	KINASE		-0.314	3.72x10-3	BCL2L11,CCND1,CDKN1A,IL33,SERPINE1,SOCS3	263
VITAMIN E	CHEMICAL DRUG		-0.313	1.66x10-3	CD44,CDKN1A,KLF6,MMP14,SERPINE1,SPP1,UCP2,VCAM1	209
FGF19	GROWTH FACTOR		-0.31	5.18x10-5	CCND1,CXCL2,CYP7A1,FASN,FDPS,HMGCR,SCD,Scd2,SCN1B,SERPINA3,SGK1,SQLE	243
IRON	CHEMICAL - ENDOGENOUS MAMMALIAN		-0.3	4.15x10-2	CCNB1,CCND1,CCND2,CDKN1A,FTH1
IL1A	CYTOKINE		-0.297	1.25x10-3	APOD,CD44,CDKN1A,CXCL12,CXCL2,CYR61,FTH1,IGFBP5,INHBA,ITGB1,MMP14,NR2F2,SERPINA3,SERPINE1,SPP1,TNFRSF11B,VCAM1,ZC3H12A	231
HSP90	GROUP		-0.297	1.71x10-2	ABCC1,AXL,CCND2,CD28,CLU,GRK6,HSPA1A/HSPA1B
PRKACA	KINASE		-0.293	1.81x10-4	BCL2L11,CCND1,CCND2,HSPA1A/HSPA1B,ID2,SDC1,SOCS3,VCAM1	256
PD 123319	CHEMICAL DRUG		-0.293	1.52x10-2	FASN,MYOG,SERPINE1,SPP1
MMP9	PEPTIDASE		-0.291	1.34x10-3	CCND1,CD44,CDKN1A,CXCL12,CXCL2,ITGB1,MMP14,SERPINE2	258
LINOLENIC ACID	CHEMICAL - ENDOGENOUS MAMMALIAN		-0.283	1.33x10-2	CLU,FASN,SERPINE1,UCP2
BERBERINE	CHEMICAL DRUG		-0.277	1.36x10-2	BSG,CCND1,CDKN1A,CYP7A1,HMGCR,LDLR,PIK3R3,UCP2,VCAM1
15-DEOXY-DELTA-12,14 -PGJ 2	CHEMICAL - ENDOGENOUS NON-MAMMALIAN		-0.273	1.43x10-2	CCNB1,CCND1,CCND2,CDKN1A,FTH1,GSN,MYOG,RORA,SERPINE1,SOCS3,SPP1,STAT1,VCAM1
TUNICAMYCIN	CHEMICAL - ENDOGENOUS NON-MAMMALIAN		-0.269	4.14x10-2	ADAM10,ASNS,ATP2A2,AXL,CCND1,CDKN1A,CXCL2,MVD,NARS,S100A4,SCD,VCAM1
CD40	TRANSMEMBRANE RECEPTOR		-0.251	9.73x10-3	BCL2L11,CCND1,CCND2,CD44,CDKN1A,CXCL12,DUSP1,ITGB1,LGALS3,MMP14,NEFH,SERPINE1,TNFRSF11B,TXLNA,VCAM1	259
NITROFURANTOIN	CHEMICAL DRUG		-0.247	2.80x10-3	ASNS,CCND1,CLU,GSTM3,HMGCR,IFRD1,ITGB1,LGALS3,MAPK3,MMP14,SDC1,SPP1,TIMP3,VCAM1
TCF3	TRANSCRIPTION REGULATOR		-0.243	1.76x10-4	BCL2L11,CCNB1,CCND2,CDKN1A,EIF4EBP1,EPRS,ETS2,ID2,IFNAR1,MSMO1,MYOG,RORA,SLC12A2,SLC7A5,SOCS3,STRN3,TCEAL9,TMEFF1,TTK,ZC3H12A	176
RPS6KB1	KINASE		-0.243	1.39x10-2	CCND1,CDKN1A,HMGCR,ISG15,SERPINE1
NRG1	GROWTH FACTOR		-0.238	1.19x10-3	ACTN1,CCND1,CCND2,CDC42EP1,CDKN1A,COL6A3,CYR61,DAG1,DUSP1,ERRFI1,ETFB,FSTL1,HMGCR,IDI1,MYOG,PDCD4,PXN,SOX4	264
EPO	CYTOKINE		-0.237	1.93x10-3	ANK1,BCL2L11,BTG1,CCND2,CDKN1A,CXCL12,H2AFZ,ITGB1,LDLR,MID1IP1,MYOG,NFIB,PDCD4,PRKCA,SLC4A1,SOCS3,SPP1,STAT3,TNFRSF11B,TSN,UCP2	232
AGER	TRANSMEMBRANE RECEPTOR		-0.235	1.49x10-2	CCND1,CDKN1A,COL4A1,CXCL2,MYOG,SERPINE1,VCAM1
SMAD3	TRANSCRIPTION REGULATOR		-0.228	4.78x10-3	BCL2L11,CCND1,CCND2,CDKN1A,COL6A3,CYP7A1,ID2,ID3,ITGB1,JAG1,PMEPA1,SERPINE1,SPP1,STAT3,TGFB2,TIMP3,ZYX	318
11,12-EPOXYEICOSATRIENOIC ACID	CHEMICAL - ENDOGENOUS MAMMALIAN		-0.218	5.11x10-3	CD44,CD82,DUSP1,VCAM1	156
HSF1	TRANSCRIPTION REGULATOR		-0.218	5.76x10-3	CCT6A,CLU,CSRP2,FASN,FXR1,HSPA1A/HSPA1B,HSPA4,LDLR,MRPL18,RAB5C,SHC1,STAT6,TCP1,VCAM1
MAP2K4	KINASE		-0.218	1.64x10-2	CCND1,CD44,CDKN1A,ERRFI1,FLNA,STAT3
BUTYRIC ACID	CHEMICAL - ENDOGENOUS MAMMALIAN		-0.215	1.14x10-5	CCNB1,CCND1,CCND2,CD44,CD81,CD82,CDKN1A,CLCN3,CLU,COL4A1,COL4A2,COL6A3,DAG1,DUSP1,FASN,FSTL1,FTH1,GAK,GSN,H2AFZ,KDM5A,NF2,NUCB1,SEPT7,SERPINE1,SGK1,SOCS3,SOX9,SPP1,STAT3,STAT6,TGFBI,TIMP3,TPR,USP7	272
SB-431542	CHEMICAL REAGENT		-0.211	1.72x10-4	CCND1,CD14,CD44,ETS2,ID2,ID3,ITGA11,SERPINE1,SMAD6,SPP1,STAT3,TGFB2	351
F2R	G-PROTEIN COUPLED RECEPTOR		-0.203	1.66x10-3	BCL2L11,CCND1,CXCL12,CYR61,DUSP1,ECE1,MYOG,VCAM1	303
LEUKOTRIENE D4	CHEMICAL - ENDOGENOUS MAMMALIAN		-0.2	4.75x10-2	CXCL2,CYR61,DUSP1,ITGB1,PDK4
MAP3K1	KINASE		-0.189	1.28x10-2	CCND1,COL4A1,CYP7A1,DUSP1,LDLR,SERPINE1
AKT1	KINASE		-0.181	4.56x10-7	BCL2L11,CCND1,CCND2,CDKN1A,CLU,COL4A1,CYP7A1,DHCR7,FASN,FSTL1,HMGCR,IGFBP5,IRS2,ITGB1,LSS,MMP14,MSMO1,MYOG,NEXN,SCD,SERPINE1,SERPINF1,SLC3A2,SORT1,SPP1,TGFB2,UNC5B,ZWINT	281
DDX17	ENZYME		-0.173	4.51x10-4	CCND1,CDKN1A,NFAT5,S100A4
LYSOPHOSPHATIDIC ACID	CHEMICAL - OTHER		-0.168	5.50x10-3	CACNA2D1,CCND1,CXCL2,CYR61,DUSP1,MAG,RALA,SERPINE1,VCAM1	255
N-AC-LEU-LEU-NORLEUCINAL	CHEMICAL - PROTEASE INHIBITOR		-0.164	7.52x10-3	ABCA7,BCL2L11,CCNB1,CCND1,CDKN1A,MYOG,PRKCA,Scd2	305
CDC42	ENZYME		-0.152	1.03x10-3	BCL2L11,CCND1,ITGB1,MYOG,SOX9,STAT3	274
IKBKE	KINASE		-0.152	2.94x10-2	ADAR,CCND1,CXCL12,CXCL2,IRF7,STAT1
TACROLIMUS	CHEMICAL DRUG		-0.151	1.93x10-3	APOD,BCL2L11,CCND1,CXADR,CXCL2,DPYSL3,FLNA,ID3,IL33,LBR,NFAT5,PDCD4,Rcan1,SDCBP,SPP1,TMEFF1	288
PI3K (FAMILY)	GROUP		-0.149	3.25x10-3	BCL2L11,CXCL12,FASN,FOXO4,ISG15,ITGA6,ITGB1,PXN,SERPINE1,SOX4	314
miR-34	MICRORNA		-0.144	1.37x10-3	ACTR1A,AXL,CCND1,CCND2,CD47,NOTCH2,PIP5K1A	61
U0126	CHEMICAL - KINASE INHIBITOR		-0.136	1.44x10-6	BCL2L11,CCND1,CCND2,CD44,CDKN1A,COL4A1,CXCL2,CYP1B1,CYP7A1,DAB2,DBNDD1,DUSP1,EEF1E1,EIF4EBP1,ERRFI1,GSN,Gsta4,INHBA,ITGA3,ITGA6,ITGB1,KDSR,LDLR,MAPK3,MYOG,RND3,SCN1B,SERPINE1,SGK1,SOCS3,SOX9,SPP1,STAT3,SVIL,TGFB2,TIMP3,TNFRSF11B,VCAM1,WISP1,WISP2	261
ETOPOSIDE	CHEMICAL DRUG		-0.135	3.42x10-4	ADAM10,BCL2L11,CCNB1,CCND1,Cdc42,CDKN1A,DUSP1,FASN,FTH1,ID2,IRF7,JAK2,PIK3R3,SGK1,SVIL,TAF6	295
THYROID HORMONE	CHEMICAL - ENDOGENOUS MAMMALIAN		-0.132	3.72x10-4	ATP2A2,CCND1,CDKN1A,CYP7A1,DAG1,ECH1,FASN,FDFT1,FDPS,HMGCR,KLF3,MAPK3,PGD,PLA2G2A,SERPINE2,STAT1,UCP2	263
ALDH1A2	ENZYME		-0.128	7.31x10-4	CD44,Cdc42,CYR61,SPP1,TGFBI,TIMP3	186
MAPK9	KINASE		-0.128	2.29x10-2	BCL2L11,CDKN1A,CHERP,FASN,KLF6,LUC7L3,PLA1A,RAD23B,SCD,SOD3,ZYX
AP1	COMPLEX		-0.128	2.39x10-2	BCL2L11,CCND1,CD44,CLU,CXCL12,IFRD1,PLA2G2A,S100A4,SERPINE1,SPP1,VCAM1
SRF	TRANSCRIPTION REGULATOR		-0.124	2.40x10-4	AKAP12,BCL2L11,CDKN1A,CLDN15,CNN2,CSRP2,ELK1,FHL2,FLNA,FOXQ1,GSN,ITGA6,ITGB1,KDSR,LDLR,MED6,MRPS35,MYLPF,MYOG,RBBP6,RND3,SMTN,SNX2,SVIL,TTN,ZYX	193
EGF	GROWTH FACTOR		-0.123	3.10x10-10	ACTN1,ATP2A2,CAVIN2,CCNB1,CCND1,CCND2,CD44,CDC42EP1,CDKN1A,CLCN3,CLU,CXCL2,CYR61,DUSP1,ELK1,ERRFI1,ETS2,FASN,FSTL1,GAK,Gsta4,ID2,IDI1,IGFBP5,INHBA,ITGB1,MAPK3,MYOG,PDCD4,PDK4,PSMB4,RALA,S100A4,SCD,Scd2,SDC1,SERPINA3,SERPINE1,SHC1,SOCS3,SOX4,SPP1,SPRY4,STAT1,TFAP2A,TIMP3,ULK1,VCAM1,ZEB1	324
METHOTREXATE	CHEMICAL DRUG		-0.12	2.55x10-5	ACSS2,ANXA4,AUH,C1R,CCND1,CD28,CDKN1A,CFH,COL4A1,CXCL12,CYP7A1,DUSP1,ECH1,FADS1,FASN,GSN,IGFBP5,SCD,SOCS3,SPP1,TIMP3,TNFRSF11B,VCAM1	251
APOE	TRANSPORTER		-0.115	1.10x10-4	APOD,CCND1,CCND2,CD44,CLU,CYP7A1,CYR61,HMGCR,HMMR,ITGA3,ITGB1,LDLR,PMEPA1,SERPINA3,SERPINE1,SOCS3,SPP1,STAT6,TRAF6,VCAM1,ZYX	218
CD5	TRANSMEMBRANE RECEPTOR		-0.115	1.17x10-2	LDLR,MSMO1,MVK,SNRPD3,STAT1,STAT3
IL6ST	TRANSMEMBRANE RECEPTOR		-0.114	1.92x10-2	ATP2A2,CCND1,SLC18A3,SOCS3,STAT3,VCAM1
THRA	LIGAND-DEPENDENT NUCLEAR RECEPTOR		-0.1	1.43x10-2	ATP2A2,CCND1,CD44,CDKN1A,CIRBP,CXCL2,CYP7A1,FASN,LDLR,SERPINE1
ALITRETINOIN	CHEMICAL DRUG		-0.094	1.39x10-3	ADAM10,APOD,CCND1,CD14,CDKN1A,COX4I1,DUSP1,FASN,ISG15,MLYCD,MMP11,PTGIS,SCD,SPP1	209
CLOFIBRATE	CHEMICAL DRUG		-0.092	1.23x10-5	BSG,CCNB1,CCND1,CCND2,ECH1,HMGCR,Hmgn2 (includes others),LDLR,NBN,PDCD4,RORA,RTN4,SCD,UCP2	306
BSG	TRANSPORTER		-0.092	2.99x10-2	BCL2L11,BSG,CCND1,CXCL12
SULINDAC SULFIDE	CHEMICAL DRUG		-0.091	4.41x10-5	CCND1,CDKN1A,CYP1B1,IFRD1,INSIG1,MSMO1,MTHFD2,NUTF2,RERE,SPTBN1,STAT3	210
ALEFACEPT	BIOLOGIC DRUG		-0.084	1.39x10-2	AKR1C3,CBLB,PTPN4,SOCS3,STAT1,STAT6
PTGS2	ENZYME		-0.08	3.42x10-2	CCND1,CD44,CDKN1A,CLU,CXCL12,CYP1B1,DUSP1,ITGA6,MMP14,NBN,NEB
DETA-NONOATE	CHEMICAL REAGENT		-0.074	9.68x10-6	ADAM10,CCND1,CDKN1A,DUSP1,HMGCR,IRF7,SERPINE1,SOD3,TNFRSF11B,VCAM1	242
miR-145-5P (and other miRNAS W/SEED UCCAGUU)	MATURE MICRORNA		-0.072	1.64x10-2	ACBD3,EIF4EBP2,FSCN1,KRT7,RASA1,SERPINE1
R5020	CHEMICAL REAGENT		-0.066	2.11x10-3	CCND1,CDKN1A,IRS2,LAMC2,PDK4,SGK1,STAT1,STAT3,TIPARP	256
NFKB1	TRANSCRIPTION REGULATOR		-0.065	1.22x10-2	AHRR,CCND1,CCND2,CD82,CDKN1A,CXCL2,DUSP1,FCGRT,FSCN1,ISG15,JAG1,KHSRP,PXN,SOX9,STAT1,UBE2H,VCAM1
miR-141-3P (and other miRNAS W/SEED AACACUG)	MATURE MICRORNA		-0.065	1.39x10-2	BCL2L11,CYP1B1,ITGB1,JAG1,TGFB2,ZEB1
MAP2K1	KINASE		-0.064	1.92x10-4	ABCC1,BCL2L11,CCND1,CD44,CDKN1A,DAB2,DUSP1,ELK1,FASN,FLNA,ITGB1,LDLR,LGALS3,MAG,MMP14,SERPINE2,UNC5B	217
MYOCD	TRANSCRIPTION REGULATOR		-0.063	1.15x10-2	ATP2A2,CDKN1A,GJA5,LPP,MYLPF,PLA2G2A,S100A4,TTN
PPARGC1A	TRANSCRIPTION REGULATOR		-0.06	3.85x10-3	CDC42EP1,CDKN1A,COX4I1,CYP7A1,FASN,GAS6,Gk,INSIG1,INSIG2,IRS2,LDLR,NDUFS8,NEFH,PDK4,SCD,SOCS3,UCP2	192
FGF1	GROWTH FACTOR		-0.056	5.41x10-4	CAVIN4,CCND1,CDKN1A,CYR61,DCAF8,PMEPA1,SERPINB1,SPP1,TGFB2,TIMP3,VCAM1,WISP1,WISP2	219
CALCINEURIN PROTEIN(S)	COMPLEX		-0.056	2.04x10-3	ATP2A2,BCL2L11,CBLB,DUSP1,MYOG,SERPINE1,SPP1,STAT3	242
CSF1	CYTOKINE		-0.052	4.76x10-4	BCL2L11,CBL,CCNB1,CCND1,CCND2,CDKN1A,CXCL2,DUSP1,ETS2,FHL2,IL6ST,IRF7,ITGB1,STAT1,TRAF6,VCAM1	254
BCL6	TRANSCRIPTION REGULATOR		-0.047	1.19x10-3	CCND1,CCND2,CD151,CD44,CDKN1A,FCGRT,FTH1,ITGA3,LDLR,LPP,PLA2G2A,SDC1,SEPT8,SERPINE1,SOCS3,SOX9,STAT6	269
MSTN	GROWTH FACTOR		-0.043	3.60x10-2	CDKN1A,IGFBP5,INHBA,MYOG,ULK1
CYCLOPAMINE	CHEMICAL REAGENT		-0.042	7.94x10-4	CCND1,CD14,CDKN1A,SOX9,SPP1	232
BAPTA-AM	CHEMICAL REAGENT		-0.036	1.86x10-2	CDKN1A,ELK1,SOCS3,SPP1,VCAM1
GLI2	TRANSCRIPTION REGULATOR		-0.036	2.80x10-2	CCND1,CCND2,CDKN1A,CXCL2,ITGB1,JAG1,SOX9,SPP1
BLEOMYCIN	CHEMICAL DRUG		-0.027	1.52x10-2	CDKN1A,CXCL2,ITGB1,MMP14,PLA1A,S100A4,SERPINE1,SPP1,STAT3,TIMP3,UBE2T,WISP1
CDKN1A	KINASE		-0.013	1.41x10-5	CCNB1,CCND1,CDKN1A,CYR61,DUSP1,H2AFZ,HJURP,HSPA1A/HSPA1B,INHBA,JAG1,KNSTRN,LBR,LGALS3,LUC7L3,PCLAF,PHGDH,SERPINE1,SHC1,SOX9,SUV39H1,TTK,UBE2T	309
CXCL12	CYTOKINE		-0.01	6.83x10-4	AKR1C3,AXL,CCND1,CD14,CD44,CD47,CD82,CXCL12,FLNA,ITGB1,MAPK8IP2,MAPRE3,MMP11,MMP14,SEPT7,SOCS3,TNFRSF11B	255
HYALURONIC ACID	CHEMICAL - ENDOGENOUS MAMMALIAN		-0.008	7.70x10-3	CD44,CXCL2,HMMR,PDCD4,SERPINE1,SOCS3,SOX9,SPP1,TGFB2,VCAM1	200
SYVN1	TRANSPORTER		0	1.95x10-6	ATP1B3,AXL,CCND1,CD151,CD44,CYP1B1,DAB2,DAG1,DUSP1,EMC7,FASN,ITGA3,ITGA6,ITGB1,RPN2,SCARA3,SLC3A2,SLC7A5	154
HIC1	TRANSCRIPTION REGULATOR		0	5.94x10-5	CCND1,CDKN1A,FADS1,FHL2,INHBA,RIN2,SOX9,SPP1,TNS3,WDR6	129
FBN1	OTHER		0	7.32x10-5	COL4A2,COL6A3,CYR61,INHBA,SERPINE1,TIMP3	243
JUNB	TRANSCRIPTION REGULATOR		0	1.54x10-4	CCND1,CD82,CLU,CXCL2,CYP1B1,DUSP1,FASN,FTH1,ID2,INHBA,MVD,SCD,SERPINE1,SGK1	231
GATA4	TRANSCRIPTION REGULATOR		0	2.65x10-3	ATP2A2,DAB2,GJA5,KRT7,MYLPF,MYOG,NF2,PLA2G2A,S100A4,SOX9,SPP1,TGFBI,TTN,VCAM1
miR-144	MICRORNA		0	4.21x10-3	ADAM10,ETS2,PPP6C,RASA1
RAE1	OTHER		0	4.21x10-3	CDKN1A,RSRP1,SOX4,TM2D3
PLICAMYCIN	CHEMICAL DRUG		0	4.31x10-3	ATP7A,AXL,CDKN1A,CYP4V2,FASN,HMGCR,SERPINE1,SERPINE2,SOCS3,STARD10	244
UBE2I	ENZYME		0	1.72x10-2	PDK4,SGK1,SOX9,STAT1
EZH2	TRANSCRIPTION REGULATOR		0	1.87x10-2	ADAM10,BCL2L11,CCND1,CCND2,CD82,CDKN1A,CHRNB1,COL4A1,CTNNA1,CXCL2,CYP1B1,EPDR1,KLHL31,LAMC2,NOTCH2,S100A4,SLC1A3,TGFB2,TIMP3
PRKD1	KINASE		0	2.18x10-2	AJUBA,CCND1,CCND2,VCAM1
TIMP1	CYTOKINE		0	2.99x10-2	CD44,CDKN1A,IL33,TIMP3
HDAC5	TRANSCRIPTION REGULATOR		0	4.75x10-2	CDKN1A,MYOG,RAD23B,RBBP6,SCD
ING1	TRANSCRIPTION REGULATOR		0.025	1.43x10-3	ADNP,CCNB1,CDKN1A,HSPA1A/HSPA1B,JAK2,SPP1	210
GENISTEIN	CHEMICAL DRUG		0.032	2.73x10-4	AKR1C3,AP1B1,ASAH1,CCNB1,CCND1,CD44,CDKN1A,CLU,CXCL12,CXCL2,DUSP1,GGA2,GGA3,GRK6,HMGCR,HSPA1A/HSPA1B,ID2,IRF7,KDSR,LDLR,OGDH,PDCD4,RPN2,SERPINE1,SIGLEC10,SORT1,SPP1,TNFRSF11B,VCAM1	239
8-BROMO-CAMP	CHEMICAL REAGENT		0.032	2.70x10-2	CD82,CLU,CYP1B1,DUSP1,FDX1,LDLR,Nes,SERPINE1,SGK1,SHC1,SPP1,TGFB2
ELK1	TRANSCRIPTION REGULATOR		0.038	5.06x10-4	CDKN1A,ELK1,INSIG2,ITGB1,MTHFD2,PRKCA,SPP1,TIPARP	258
SMARCB1	TRANSCRIPTION REGULATOR		0.038	1.96x10-2	ATP1B1,BCL2L11,BTG1,CCND1,CD44,CDKN1A,CYP39A1,ETS2,GSN,PLXNB2,RAB5C,RND3
CA2+	CHEMICAL - ENDOGENOUS MAMMALIAN		0.046	5.62x10-4	ATP2A2,CCND1,CCND2,CDKN1A,CYP1B1,CYR61,DUSP1,ELK1,FASN,HMGCR,ID3,IL33,IRS2,ITGA3,ITGA6,MAG,Nes,Rcan1,SERPINE1,SGK1,SPP1	304
SUNITINIB	CHEMICAL DRUG		0.053	2.48x10-4	BCL2L11,CCND2,CDKN1A,CTNNA1,ITGA3,ITGA6,ITGB1,TGFBI	243
ROSIGLITAZONE	CHEMICAL DRUG		0.055	5.65x10-3	ACSS2,ASAH1,CCND1,CDKN1A,COL4A3BP,COX4I1,ECH1,FASN,FDX1,Gk,IGFBP5,INSIG1,IRS2,MLYCD,MYOG,PCCA,PDK4,RORA,SCD,SERPINE1,SERPINF1,SGK1,SOCS3,UCP2,WISP1,WISP2	234
FULVESTRANT	CHEMICAL DRUG		0.074	5.91x10-4	ASNS,AXL,CCNB1,CCND1,CDKN1A,CXCL12,CYR61,FKBP1A,HSD17B7,ID2,IGFBP5,ITGB1,LDLR,PDCD4,SLC7A5,STAT3,TGFB2,TNFRSF11B,VCAM1,WISP2,ZEB1	312
MONO-(2-ETHYLHEXYL)PHTHALATE	CHEMICAL TOXICANT		0.078	2.98x10-4	CCND2,COX4I1,EIF3J,FADS1,FASN,Gk,HIPK2,IRS2,LDLR,MLYCD,N4BP1,NFIB,OGDH,PDK4,RSRP1,SC5D	221
AGN194204	CHEMICAL DRUG		0.08	2.27x10-8	ADAM19,CCNB1,CDKN1A,COTL1,CYP51A1,DHCR7,DUSP1,FDFT1,FDPS,FDX1,H2AFZ,Hmgn2 (includes others),IDI1,IFITM3,IRS2,KLF6,LSS,NSDHL,PDCD4,SCD,Scd2,SLC3A2,SPP1
ARSENITE	CHEMICAL TOXICANT		0.08	5.63x10-3	ABCC1,CCND1,CDKN1A,CYP1B1,DUSP1,Hist1h1e,HSPA1A/HSPA1B,INHBA,SERPINE1,TGFB2	323
TOPOTECAN	CHEMICAL DRUG		0.087	6.64x10-3	AKAP12,BTG1,CCNB1,CDKN1A,GPC6,HMGXB4,HMMR,HSPA1A/HSPA1B,KIAA0040,MED13L,SLC7A5,SOX4,STRN3,UBE2B	211
GW9662	CHEMICAL REAGENT		0.091	1.48x10-3	CD14,CDKN1A,FASN,INSIG1,IRS2,MID1IP1,RORA,SDC1,UCP2,VCAM1	204
PAX7	TRANSCRIPTION REGULATOR		0.092	1.49x10-2	ID2,ID3,PKIA,PRRX1,RAD23B,RASA3,SLC44A1
JAK2	KINASE		0.104	1.64x10-3	ACTN1,AKR1C3,BCL2L11,CCND1,CCND2,CDKN1A,JAK2,SLC1A3,SOCS3,STAT1,STAT3,TRAM1	262
AROTINOID ACID	CHEMICAL TOXICANT		0.106	1.16x10-2	CDKN1A,DUSP1,SCD,SOX9
GATA1	TRANSCRIPTION REGULATOR		0.107	3.96x10-2	ACTN1,ANK1,BCL2L11,CCND1,CCND2,DUT,HIPK2,IL6ST,ITGA6,NEFH,PLXNA2,SLC3A2,SLC4A1,TGFB1I1
IGF2	GROWTH FACTOR		0.108	3.91x10-4	CCND1,CDKN1A,CYP1B1,DHCR7,DUSP1,ELOVL6,IGFBP5,MMP11,MXI1,MYOG,PDCD4,SERPINE1,SOCS3,SPP1,TGFBI,ZEB1	221
F2	PEPTIDASE		0.109	7.66x10-6	CCND1,CCND2,CD44,CDC42EP1,CDKN1A,CLU,COL4A1,COTL1,CYR61,DAAM1,DUSP1,ECE1,IGFBP5,ITGB1,KLF6,MAPK3,MFHAS1,MTSS1,MYOG,SERPINE1,SMTN,TGFB2,TMED9,VCAM1,YIF1A	302
SPP1	CYTOKINE		0.111	2.48x10-8	BCL2L11,CD44,CDKN1A,CXCL12,CXCL2,CYP39A1,DHCR7,EPDR1,ETS2,HMGCR,INSIG1,ITGA3,JAG1,MMP14,NDUFS8,PGD,PTPMT1,S100A4,SC5D,SERPINE1,SERPINF1,SOX9,SPP1,TM7SF2	213
DEXAMETHASONE PHOSPHATE	CHEMICAL DRUG		0.113	1.21x10-6	DUSP1,ERRFI1,ID3,PDK4,SGK1,SOX9,TIPARP,TNFRSF11B	190
GAST	OTHER		0.113	2.37x10-2	CCND1,JAG1,JAK2,NARS,SLC4A2,STAT3,VCAM1
TNF (FAMILY)	GROUP		0.124	1.45x10-2	CCND1,CIRBP,CXCL12,GJA5,IL33,INHBA,JAG1,PLEK2,SERPINE1,SOCS3,VCAM1
PTPN11	PHOSPHATASE		0.124	3.34x10-2	BSG,CCND1,CD14,CDKN1A,FASN,SOCS3
ROCK	GROUP		0.128	3.25x10-5	CCND1,CDKN1A,LPP,MYLPF,Nes,SORT1,SOX9,SPP1,VCAM1	239
CG	COMPLEX		0.128	1.38x10-3	AKR1C3,BTG1,CCND2,CDKN1A,CLU,CNPY4,DHCR7,DUSP1,HMGCR,HSD17B7,IL33,INHBA,IRS2,ITGB1,LDLR,MAPK3,MVK,NUCB2,PKIA,RORA,SDC1,SMAD6,SPP1,STEAP1,TGFB2	329
GW501516	CHEMICAL DRUG		0.128	3.75x10-3	APOD,CCND1,CDKN1A,ECH1,FASN,IGFBP5,PDK4,PLAC1,SCD,UCP2	165
SNAI2	TRANSCRIPTION REGULATOR		0.148	1.62x10-4	AXL,BSG,CCND1,CXCL12,CYR61,ITGA3,ITGB1,MMP14,SOX9	157
ATF3	TRANSCRIPTION REGULATOR		0.148	1.49x10-2	ASNS,CCND1,CD82,CDKN1A,GSN,LDLR,SERPINE1,STAT3
2-ACETYLAMINOFLUORENE	CHEMICAL TOXICANT		0.152	2.15x10-3	CCND1,CDKN1A,JAG1,NOTCH2	168
JINK1/2	GROUP		0.152	6.14x10-3	CYP7A1,FASN,FOXO4,SCD	179
FHL2	TRANSCRIPTION REGULATOR		0.152	1.52x10-2	BCL2L11,CCND1,FHL2,SPP1
STAT6	TRANSCRIPTION REGULATOR		0.158	4.02x10-4	ADAM19,AUH,CCND2,CDKN1A,CXCL2,FASN,HIPK2,HMGCR,IL33,IL6ST,IRF7,IRS2,ISG15,JAG1,JAK2,MMP14,MVK,PDK4,Scd2,SERPINE1,SERPINF1,STAT6,VCAM1	255
LEPR	TRANSMEMBRANE RECEPTOR		0.165	1.38x10-5	ATP2A2,BTG1,Cdc42,COL4A1,EIF4EBP1,FASN,Gk,HMGCR,ID2,INPPL1,IRS2,LDLR,MMP14,NBN,SERPINE1,SOCS3,STAT3,TIMP3,UCP2	240
METRIBOLONE	CHEMICAL REAGENT		0.167	5.85x10-7	ACTN1,AKAP12,ATP1B1,CCND1,CDKN1A,CLU,ERRFI1,FASN,FDFT1,FDPS,FHL2,HMGCR,IGFBP5,ITGA6,LDLR,MARS,PGM3,PJA2,PMEPA1,RAD23A,Rhox5,SMS,STEAP2,SVIL	286
ISOTRETINOIN	BIOLOGIC DRUG		0.169	1.83x10-2	CDKN1A,CYP1B1,FASN,PRKCA,PTGIS,SERPINA3,VCAM1
miR-133A-3P (and other miRNAS W/SEED UUGGUCC)	MATURE MICRORNA		0.179	3.60x10-2	Cdc42,FSCN1,KRT7,TBL1X,YES1
MYCOPHENOLIC ACID	CHEMICAL DRUG		0.18	1.05x10-5	AKAP12,CCND2,CDKN1A,CLU,CYR61,DUSP1,ID2,ID3,INHBA,LDLR,MYLPF,PDLIM5,SERPINE1	279
S100A8	OTHER		0.18	4.50x10-3	AKAP12,Arl4c,C1S,CCND1,CXCL2,IL33,ISG15,MAG,MMP14,SGK1,SOCS7,TUBA8,VCAM1,WISP2	280
NFKBIA	TRANSCRIPTION REGULATOR		0.183	6.91x10-8	AXL,CCNB1,CCND1,CCND2,CD82,CDKN1A,CLU,CTNNA1,CXCL12,CXCL2,CYP1B1,DAG1,FCGRT,FHL2,FSCN1,IL33,ISG15,ITGA3,ITGB1,MMP14,NBR1,NID1,PMEPA1,RASA3,SDC1,SERPINE2,SGK1,SLC12A2,SOCS3,SOD3,SOX9,SPTBN1,TCEAL9,TGFB1I1,TGFB2,TIMP3,TNFRSF11B,UBA1,UBE2H,VCAM1	248
CD9	OTHER		0.194	1.33x10-2	ITGA3,ITGA6,ITGB1,WISP1
RETN	OTHER		0.203	2.23x10-5	FASN,LDLR,MMP14,SCD,SERPINE1,SOCS3,SPP1,STAT3,VCAM1	238
WNT5A	CYTOKINE		0.207	4.27x10-4	CCND1,CD14,CXCL12,CXCL2,DAB2,FLNA,ID2,ID3,SDC1,SOCS3,SPP1,STAT1,STAT3	237
BBI608	CHEMICAL DRUG		0.213	4.56x10-4	AXL,CD44,HPRT1,ITGA6,ITGB1,JAG1,JAK2,NOTCH2,STAT3
KDM5A	TRANSCRIPTION REGULATOR		0.213	4.57x10-2	ATP1B1,CCND1,CHRNB1,COL4A3BP,COX4I1,ITGB1,MLYCD,PGD,TNNC2
GO 6976	CHEMICAL - KINASE INHIBITOR		0.218	3.46x10-3	ABCA7,CCND1,CDKN1A,CXCL2,ITGB1,PRKCA,VCAM1	243
PRKCD	KINASE		0.23	6.53x10-4	CCND1,Cdc42,CDKN1A,CXCL12,ETS2,HJURP,KLF6,LDLR,PALMD,PDCD4,SERPINE1,SMAD6,STAT3,TNFRSF11B,VCAM1,ZEB1	234
FN1	ENZYME		0.232	1.66x10-4	CCND1,CDKN1A,CXCL2,FLNA,ITGB1,KRT7,MMP14,PXN,SCRN1,SDC1,SDCBP,SERPINE1,SMARCA4,SOCS3,SOX9,SPP1,UBE2B,UBE2H,ZYX	262
EDN1	CYTOKINE		0.233	9.80x10-5	ADAM19,ANXA4,ATP2A2,CCND1,COL4A1,CYR61,EIF3J,ERRFI1,INHBA,ITGB1,PRKCA,PXN,SDC1,SERPINE1,SOCS3,TIMP3,TTN,UBTF,VCAM1	306
AR	LIGAND-DEPENDENT NUCLEAR RECEPTOR		0.245	5.32x10-6	ACTR3,Akr1c19,AKR1C3,ATP2A2,CCND1,CDKN1A,CHRNB1,CUX1,CXCL12,DHCR7,DYRK1A,ETS2,GAS6,GSN,HMGCR,IGFBP5,ITGA6,LRRK1,MSMO1,MTHFD2,MYOG,PMEPA1,PRKCA,PSCA,Rhox5,SERPINE1,SGK1,SMTN,SOX9,SPP1,STAT1,STEAP2,TGFB2,TRIM25,ZWINT,ZYX	322
INSULIN	GROUP		0.245	4.63x10-4	ADAM10,ATP7A,CCND1,CDKN1A,COL4A1,CYP7A1,DUSP1,ERRFI1,FADS1,FASN,HMGCR,INSIG2,IRS2,JAK2,NUCB2,PDK4,PRKCA,SCD,Scd2,SERPINE1,SGK1,SORT1,SQLE,STAT3,TGFBI,UBTF,UCP2	218
miR-155	MICRORNA		0.245	1.14x10-2	ADAM10,CCND1,CD47,CDKN1A,RORA,SDCBP,SERPINE1,SOCS3,STAT3
IL10	CYTOKINE		0.251	1.06x10-2	ARNT2,CCND2,CD14,CD28,CD44,CDKN1A,CXCL12,CXCL2,DUSP1,ETS2,IL33,IL6ST,MYOG,PAM,PHGDH,PLA2G2A,SLC1A3,SOCS3,STAT1,STAT3,TRAF6,VCAM1
CAMPTOTHECIN	CHEMICAL DRUG		0.252	6.67x10-4	AKAP2,ANXA4,C11orf95,CCNB1,CCND1,CD47,CDKN1A,CLASP1,CXCL2,FAM53C,FNDC3B,FSCN1,GAPVD1,GRINA,GSE1,HJURP,ID3,INSIG1,LDLR,LGALS3,MARK2,MED13L,RALBP1,RASA1,RSRP1,SDC1,SERPINE1,SPP1,SPTBN1,STK38L,SYNE1,TBL1X,TGFBI,TLN2,TNS3,TRA2A,ULK1,VCAM1	329
CIGARETTE SMOKE	CHEMICAL TOXICANT		0.252	2.06x10-2	AOX1,CCND1,CDKN1A,COL4A2,CXCL2,CYP1B1,CYR61,PGD,PRKCA,SERPINA3,SERPINE1,SOD3,STAT1,TCP1,XDH
ERK1/2	GROUP		0.253	1.03x10-5	AKR1C3,ASAH1,BCL2L11,CCND1,CCND2,CD44,CDKN1A,CXCL12,CYP7A1,DUSP1,ECE1,ELK1,ID3,IRS2,ITGA3,LDLR,MAPK3,MYOG,SERPINE1,SGK1,SOCS3,SOX9,SPP1,SPRY4,VCAM1,WISP1,ZEB1	342
NFE2L2	TRANSCRIPTION REGULATOR		0.253	4.11x10-4	ABCC1,AOX1,CDKN1A,COL4A2,CXCL2,DHCR7,EIF2S1,EIF3C,EIF3E,EPHB4,FTH1,Gsta4,HPRT1,IFRD1,MSMO1,NARS,NBR1,NUCB2,PGD,PKIA,PSAT1,PSMB4,SERPINA3,SERPINE1,SHC1,SOCS3,SOD3,UBQLN2,VCAM1	268
IFIH1	ENZYME		0.254	2.43x10-2	CXCL2,IRF7,ISG15,RND3
CHOLINE	CHEMICAL - ENDOGENOUS MAMMALIAN		0.254	3.96x10-2	CDKN1A,ERRFI1,SLC44A1,SPP1
CYCLOHEXIMIDE	CHEMICAL REAGENT		0.262	1.73x10-3	CCND1,CD44,CDKN1A,CXCL2,CYR61,DUSP1,EIF4G1,FDX1,IGFBP5,IRF7,IRS2,KLF3,MMP11,MYOG,PLA2G2A,PSCA,PTGIS,PXN,SCD,SERPINE1,SOCS3,SPP1,TNFRSF11B,VCAM1,XDH	230
SU6656	CHEMICAL TOXICANT		0.277	7.94x10-3	CCND1,ETS2,INHBA,SOCS3,TNFRSF11B	274
AKT	GROUP		0.279	7.79x10-3	BCL2L11,CCND1,CCND2,CD44,CDKN1A,COX4I1,CXCL12,ELK1,MMP14,NRP2,PDK4,SERPINE1,SGK1,SOCS3,SOX4,SPP1,TIPARP,VCAM1	259
TRIPTERINE	CHEMICAL - ENDOGENOUS NON-MAMMALIAN		0.28	1.33x10-2	HSPA1A/HSPA1B,NF2,TCP1,VCAM1
BENZYL ISOTHIOCYANATE	CHEMICAL - ENDOGENOUS NON-MAMMALIAN		0.283	1.33x10-2	BCL2L11,CCNB1,SERPINE1,VCAM1
CREB	GROUP		0.295	2.94x10-4	ATP2A2,CCND1,CD14,CDKN1A,CYP51A1,DDX28,DDX6,DUSP1,EIF4EBP2,EPHB4,Foxn3,FSCN1,GJA5,GSTM3,LDLR,MLLT6,PHTF1,PRKCA,PSMC3IP,PYCR1,SOX4,SOX9,TNFRSF11B,WISP1	181
CDH1	OTHER		0.301	2.09x10-2	CCND1,CD44,EIF4EBP1,KRT7,MMP14,S100A4,SOX9
IFI16	TRANSCRIPTION REGULATOR		0.302	1.46x10-3	CCND1,CD28,CD81,CDKN1A,ID2,ISG15,LDLR,MTHFD2,VCAM1	295
BUCLADESINE	CHEMICAL TOXICANT		0.313	4.09x10-4	ANKRD52,CCND1,CD14,CD44,CDKN1A,CHST2,CLU,CYP7A1,Dclk1,DUSP1,ERRFI1,ETNK1,FDX1,HMGCR,IGFBP5,IRS2,LDLR,MMP14,MYOG,Rcan1,SERPINE1,SOCS3,TGFB2,ZEB1	237
JNK	GROUP		0.323	4.00x10-2	ASAH1,BCL2L11,BTG1,CCND1,CD44,CXCL12,DUSP1,KLF6,MMP14,SERPINE1,SOCS3,TNN,VCAM1
LET-7	MICRORNA		0.325	2.29x10-2	CCNB1,CCND1,CD44,GTF2I,ID2,IRS2,S100A4,SCD,SOX9,SSR1,STAT3
PD98059	CHEMICAL - KINASE INHIBITOR		0.331	4.77x10-5	ACTR3,AKAP12,BCL2L11,CCNB1,CCND1,CCND2,CD14,CD44,CDC42EP1,CDKN1A,CLU,COL4A1,CXCL2,CYP1B1,DUSP1,ECE1,ELK1,ERRFI1,FASN,FTH1,GTF2I,ID3,ITGB1,LDLR,MAPK3,MMP14,MYOG,NOP56,PLA1A,S100A4,SDC1,SERPINE1,SLC3A2,SOCS3,SPP1,SQLE,STAT3,VCAM1,WISP2	257
SP600125	CHEMICAL - KINASE INHIBITOR		0.336	7.74x10-5	AKR1C3,BCL2L11,CCNB1,CCND1,CD44,CDKN1A,CXCL2,CYR61,FASN,ISG15,ITGA3,ITGA6,LDLR,MTHFD2,MYOG,SCD,SERPINE1,SOCS3,SPP1,VCAM1	286
EGR2	TRANSCRIPTION REGULATOR		0.341	4.03x10-4	ABCC1,BCL2L11,CBLB,CDKN1A,CYP51A1,DHCR7,HMGCR,ID2,MAG,SCD,SLC12A2,SLC18A3,SLC1A3,SOCS3,SQLE	292
DEXTRAN SULFATE	CHEMICAL DRUG		0.342	2.69x10-3	CCNB1,CD14,CFH,CXCL2,EPHB4,HJURP,ID3,IFITM3,IRF7,ISG15,MMP14,PHGDH,SERPINE1,SOCS3,SPC25,STAT3,TGFB2,VCAM1	239
GNRH-A	CHEMICAL REAGENT		0.342	1.49x10-2	CDKN1A,CHERP,KLF6,MVK,SCN1B,SERPINE1,SNAPC3
CARDIOTOXIN	CHEMICAL - OTHER		0.342	2.10x10-2	ADAM10,CCND1,CCND2,ITGA6,KARS,MYOG,SFXN1,SPP1,STAT3,TSHZ3,UCP2
KLF5	TRANSCRIPTION REGULATOR		0.345	4.45x10-2	CCND1,CDKN1A,DUSP1,TCF23,UCP2
miR-15	MICRORNA		0.35	9.46x10-3	CCND1,CCND2,CD82,HSPA1A/HSPA1B,ISG15,MAPK3,UCP2
MITF	TRANSCRIPTION REGULATOR		0.351	2.45x10-3	ASAH1,C8orf44-SGK3/SGK3,CCNB1,CD151,CD44,ITGA3,LGALS3,MMP14,PLA1A,PSMC3IP,SDC1,SERPINE1,SERPINF1,SORT1,SOX9,SPC24,SPC25,TFAP2A
PIK3R1	KINASE		0.351	2.22x10-2	ATF5,CCND1,CCND2,IRF7,ISG15,SERPINE1,VCAM1
FGF2	GROWTH FACTOR		0.354	3.62x10-7	AGAP3,CCND1,CCND2,CDKN1A,CHRM4,CXCL12,CXCL2,CYR61,ELK1,ERRFI1,FDX1,FLNA,FOXO4,FTH1,ID3,IGFBP5,INHBA,ITGA3,ITGB1,MYOG,Nes,REXO1,S100A4,SCD,SDC1,SERPINE1,SOCS3,SOX9,SPP1,SPRY4,TGFB2,TIMP3,VCAM1,ZEB1	246
GH1	GROWTH FACTOR		0.358	3.24x10-4	ABCC1,CCNB1,CLU,CUX1,CYP7A1,FASN,FDPS,FTH1,ID2,ID3,IGFBP5,LDLR,RAD23A,RAD23B,SMARCA4,SOCS3,SPP1,TFAP2A,XDH	296
BEXAROTENE	CHEMICAL DRUG		0.363	5.39x10-4	AKR1C3,ASNS,AXL,BNIP2,CCND1,CYR61,DUSP1,FKBP2,Gsta4,MTHFD2,NDUFB2,Nes,NRP2,SCD,SLC7A5,TGFB2,VCAM1	171
3,4,5,3',4'-PENTACHLOROBIPHENYL	CHEMICAL TOXICANT		0.363	2.67x10-2	CCND2,CD44,CYP1B1,ETS2,Gsta4,HSPA1A/HSPA1B,TIPARP
LOSARTAN POTASSIUM	CHEMICAL DRUG		0.376	1.52x10-2	ATP2A2,Flt1,SERPINE1,SOCS3,SPP1,TGFB2,UCP2,VCAM1,ZEB1
miR-17	MICRORNA		0.397	1.51x10-2	BCL2L11,BNIP2,CCND1,CDKN1A,STAT3,TNKS2
SOX2	TRANSCRIPTION REGULATOR		0.401	1.98x10-2	ANKRD17,CCND1,CDKN1A,DUSP1,ETS2,FOXO4,ID2,INHBA,JAG1,KLF6,KRT7,Nes,NF2,PLAC1,SPRY4,TGFB2,TIMP3,WISP1,WISP2
ANGPT2	GROWTH FACTOR		0.404	9.52x10-2	ABCC1,BCL2L11,C1R,CDKN1A,FKBP10,FKBP2,HSPA1A/HSPA1B,HSPA4,MYOG,PDCD4,SERPINE1,SOCS7,SOD3,VCAM1	279
KITLG	GROWTH FACTOR		0.412	1.53x10-2	AXL,BCL2L11,BTG1,CD14,CDKN1A,EPHB4,FTH1,GAS6,ID2,LDLR,MID1IP1,PDCD4,PRKCA,SHC1,SLC4A1,STAT3,TXNL1,UCP2	269
TMSB4	GROUP		0.418	4.58x10-4	ITGA3,ITGB1,SERPINE1,SPP1,TRAF6	176
FOXO1	TRANSCRIPTION REGULATOR		0.425	1.68x10-4	BCL2L11,CCNB1,CCND1,CDKN1A,CYP7A1,EIF4EBP1,ELOVL6,FASN,FDPS,Gk,HMGCR,IRS2,ITGA3,JAG1,MVD,MXI1,MYOG,PDK4,Ptprv,Rcan1,SCD,SERPINE1,SGK1,SPC25,SQLE,TRAF6,VCAM1	226
SELUMETINIB	CHEMICAL DRUG		0.428	9.22x10-4	ABCC1,BCL2L11,CCND1,CDKN1A	261
DGCR8	ENZYME		0.44	3.60x10-2	CCND1,ID2,JAG1,PDCD4,SMOC1
IGG	COMPLEX		0.444	1.08x10-3	ASAH1,ATP1B1,ATP1B3,CCND2,CDKN1A,DHCR7,DUSP1,ELK1,IFITM3,ISG15,LDLR,LGALS3,RND3,SERPINE1,VCAM1	319
PIAS1	TRANSCRIPTION REGULATOR		0.447	1.22x10-3	CCND1,CDKN1A,FASN,MYOG,SCD,STAT1	253
RARB	LIGAND-DEPENDENT NUCLEAR RECEPTOR		0.447	1.24x10-3	ADAM10,CDKN1A,CXCL12,CXCL2,ID3,MMP11,SPP1,STAT1,STAT6,YES1	255
NCOR-LXR-OXYSTEROL-RXR-9 CIS RA	COMPLEX		0.447	1.75x10-3	CYP51A1,CYP7A1,FASN,FDFT1,SCD
SIRT6	ENZYME		0.447	3.83x10-3	ELOVL6,FASN,HMGCR,IRS2,LSS,MAPK3,SCD	227
ELF4	TRANSCRIPTION REGULATOR		0.447	5.38x10-3	CDKN1A,CXCL2,DUSP1,NDUFS8,SPP1	135
TETRAETHYLAMMONIUM	CHEMICAL DRUG		0.447	1.25x10-2	ECH1,FTH1,NDUFS8,PSMB4,TCP1
ZFHX3	TRANSCRIPTION REGULATOR		0.447	4.38x10-2	CCND1,ID2,ID3,IFITM3,MYOG,Nes,RORA
AHR	LIGAND-DEPENDENT NUCLEAR RECEPTOR		0.449	1.82x10-6	ACTN1,ADAM19,AHRR,CCNB1,CCND1,CD14,Cdc42,CDKN1A,CHST2,COL4A1,COL4A2,COL6A3,CYP1B1,GAS6,HMGCR,INSIG2,ITGA6,JAG1,NID1,PLXNA2,SCD,SDC1,SERPINE1,SOCS3,SPP1,STAT3,TGFB2,TGFBI,TIMP3,TIPARP,TUBA8	344
FGFR2	KINASE		0.45	6.45x10-5	CCND1,CCND2,CDKN1A,COL4A1,COL4A2,CYP7A1,DAB2,FOXQ1,ID2,PLXNB2,SPP1,VCAM1,WISP1,WISP2,ZEB1	241
LDL	COMPLEX		0.457	2.55x10-5	ATP2A2,AXL,CCND1,CDKN1A,CXCL2,DUSP1,ECE1,FDPS,GAS6,GJA5,GTF2I,HMGCR,INSIG1,IRF7,LDLR,MMP14,OSBPL6,RND3,SERPINE1,SHC1,SOCS3,VCAM1,YES1	298
SCARB1	TRANSPORTER		0.465	4.31x10-4	APOD,CXCL2,FASN,HMGCR,LDLR,SPP1,VCAM1	254
IMATINIB	CHEMICAL DRUG		0.465	1.31x10-2	BCL2L11,CCND1,CCND2,CDKN1A,CXCL12,DAB2,STAT1,STAT3
NICOTINE	CHEMICAL DRUG		0.468	1.68x10-2	CACNA2D1,CCND1,CCND2,CD44,CDKN1A,LDLR,LGALS3,RBBP6,SERPINE1,SERPINF1,SLC18A3,SPP1,STAT1
PDX1	TRANSCRIPTION REGULATOR		0.469	1.10x10-2	ATP2A2,CCND1,CD44,CXCL2,ECH1,GNG12,ID2,ID3,INSIG1,IRS2,KLF6,PHGDH,SPP1
BCL2	TRANSPORTER		0.47	1.52x10-2	ABCC1,ATP2A2,BCL2L11,CCND1,CDKN1A,CLCN3,ITGB1,SOX9,TGFB2
HAND2	TRANSCRIPTION REGULATOR		0.492	3.10x10-2	ATP2A2,GJA5,PLA2G2A,S100A4,TTN
NOS2	ENZYME		0.496	3.74x10-2	ATP2A2,CD14,CD44,CDKN1A,COL4A1,CXCL2,FASN,IRS2,ISG15,KLF6,SERPINA3,SFXN1
XDH	ENZYME		0.506	8.96x10-3	DUSP1,ID3,MMP14,SERPINE1,SPP1	245
MAP3K7	KINASE		0.512	2.09x10-2	CD14,CXCL2,IRF7,ITGB1,MYOG,SERPINE1,SPTBN1
PRKCQ	KINASE		0.513	4.04x10-3	CD44,CDKN1A,ITGB1,MYOG,STAT3	209
CREM	TRANSCRIPTION REGULATOR		0.519	3.56x10-5	ANXA4,ATP2A2,CCNB1,CCND1,CCND2,CYP51A1,DUSP1,ERRFI1,HMGCR,HSPA4,IDI1,IRS2,LDLR,LSS,MSMO1,MVK,TIPARP	236
TBX5	TRANSCRIPTION REGULATOR		0.519	9.46x10-3	ATP2A2,CXCL2,GJA5,MYLPF,PLA2G2A,S100A4,TTN	108
miR-92A-3P (and other miRNAS W/SEED AUUGCAC)	MATURE MICRORNA		0.549	1.72x10-2	BCL2L11,CCND1,CCND2,CDKN1A
OBLIMERSEN	BIOLOGIC DRUG		0.563	7.45x10-4	CDKN1A,DUSP1,IFRD1,IRF7,ISG15,N4BP1,PRKCA,STAT1
CD 437	CHEMICAL DRUG		0.57	7.56x10-3	ATP6V0C,CCT6A,CDKN1A,FSCN1,FTH1,ITGA11,KARS,NARS,PCLAF,PSMF1,PURB,RPL36AL,SEPT7,SOX4,UXT
CST5	OTHER		0.571	1.15x10-3	ABCC1,AGO1,AKAP12,CBY1,CD44,COPS7A,EBNA1BP2,ID3,KDM5B,MRTO4,MYCBP2,NF2,NIFK,PABPN1,PCLAF,PDCL3,PDLIM5,PPIC,SLC1A3,SOX4,STEAP1
ZBED6	OTHER		0.577	7.01x10-3	PMEPA1,SGK1,SPTBN1,TTK,ZEB1
FOS	TRANSCRIPTION REGULATOR		0.585	7.36x10-6	ABCC1,ADNP,AKR1C3,ANXA4,BCL2L11,BLMH,CCND1,CD14,CD44,CLU,DAP,EEA1,ELOVL6,FASN,FSTL1,FTH1,GAK,HMMR,IGFBP5,IRS2,ITGA6,ITGB1,KLF6,LGALS3,NSDHL,PMEPA1,SCD,SDC1,SERPINE1,SERPINE2,SOCS3,SPP1,STAT6,TBL1X,TGFBI,TIPARP,TNFRSF11B,Trib2,VCAM1,XDH,ZEB1	290
AMPK	COMPLEX		0.587	3.34x10-4	BCL2L11,CCNB1,CCND2,CDKN1A,CXCL12,FASN,FSCN1,SERPINE1,SLC6A8,STAT1,Tsc22d3,UCP2,VCAM1	245
RUNX3	TRANSCRIPTION REGULATOR		0.595	1.17x10-2	ABCC1,BCL2L11,CCND1,CDKN1A,JAG1,SPP1
NCOR1	TRANSCRIPTION REGULATOR		0.6	7.33x10-5	CCND1,CD82,CDKN1A,CYP7A1,DUSP1,FASN,MYOG,PDK4,PLA2G2A,PMEPA1,SERPINF1,STEAP2	233
L-SERINE	CHEMICAL - ENDOGENOUS MAMMALIAN		0.602	4.51x10-4	CCND1,CDKN1A,PHGDH,PSAT1	131
RESVERATROL	CHEMICAL DRUG		0.618	4.93x10-5	BSG,CCNB1,CCND1,CCND2,CD14,CDKN1A,COX4I1,CXCL2,CYP1B1,CYP7A1,ECE1,FASN,FOXO4,HMGCR,ISG15,JAG1,LDLR,PDCD4,PDK4,SERPINE1,SPP1,TGFB2,TNFRSF11B,VCAM1,ZEB1	350
AGT	GROWTH FACTOR		0.619	5.50x10-9	ATP1B1,CCND1,CCND2,CD44,CDKN1A,COL4A1,COX4I1,CREB5,CXCL2,DAB2,DUSP1,ERRFI1,FASN,FDFT1,FDX1,Foxn3,HMGCR,HSPA1A/HSPA1B,ID3,IDI1,IGFBP5,IL6ST,ITGB1,JAG1,LDLR,LPP,LSS,MSMO1,Rcan1,SERPINE1,SGK1,SHC1,SOCS3,SOD3,SOX4,SPIN1,SPP1,TGFB2,TLN2,TTN,UCP2,VCAM1,ZEB1	251
BISINDOLYLMALEIMIDE I	CHEMICAL - KINASE INHIBITOR		0.622	1.14x10-2	CCND2,CD44,CDKN1A,CLU,EIF4EBP1,MAPK3,PDCD4,PRKCA,SERPINE1
HOXA3	TRANSCRIPTION REGULATOR		0.625	3.10x10-2	Cdc42,ITGB1,NR2F2,STAT6,UNC5B
NOREPINEPHRINE	CHEMICAL - ENDOGENOUS MAMMALIAN		0.626	1.59x10-2	ATP2A2,CHST2,Dclk1,DUSP1,ELOVL6,ETNK1,FDX1,FTH1,IRS2,Rcan1,SERPINE1,SGK1
TLR4	TRANSMEMBRANE RECEPTOR		0.628	2.31x10-2	CCND2,CD14,CD44,COL4A3BP,COX4I1,CXCL2,CYR61,DAB2,IFITM3,INHBA,IRF7,ISG15,JAG1,PLA1A,SOCS3,SPP1,STAT1,STAT3,TRAF6,VCAM1,ZC3H12A
NEUROG1	TRANSCRIPTION REGULATOR		0.632	1.04x10-4	C1S,CAVIN2,CCND2,CD82,CFH,INHBA,PPIC,PXDN,S100A4,SERPINF1
ERG	TRANSCRIPTION REGULATOR		0.632	1.13x10-2	ACTN1,DAAM1,DBN1,GAK,HMMR,ITGA6,PHACTR2,PLA1A,PTPN4,PXN,SOX4,SPP1,SVIL,TGFB1I1
DICER1	ENZYME		0.634	1.79x10-4	APOD,AXL,BCL2L11,CCND1,CCND2,CD44,CDKN1A,CYR61,HMGCR,HSD17B7,ID3,ITGA6,ITGB1,MAG,NEFH,PANK3,PDCD4,PRKCA,RAD23A,RBFOX2,SERPINE1,SERPINF1,SOCS3	278
3-DEAZANEPLANOCIN	CHEMICAL DRUG		0.647	8.42x10-4	CDKN1A,KLF6,KRT7,NOTCH2,PRKCA,SELENOS,TIMP3,TNS3
RIFAMPIN	CHEMICAL DRUG		0.647	7.39x10-3	ABCC1,CD14,CFL1,CYP7A1,ELK1,HMMR,IFRD1,SEPT7,SERPINB1,SPP1,TNFRSF11B,TSN
RESIQUIMOD	CHEMICAL DRUG		0.651	8.74x10-3	ANXA4,CD44,CREB5,CXCL12,CXCL2,ETS2,IL33,INHBA,IRF7,PSMB4,SPP1,TRAF6,ZC3H12A	252
DOXORUBICIN	CHEMICAL DRUG		0.655	1.50x10-8	ABCA7,ABCC1,ADAM10,ASNS,ATP2A2,BCL2L11,BTG1,CCNB1,CCND1,CD14,CD44,CDCP1,CDKN1A,CLU,CYR61,DUSP1,FTH1,GSTM3,HIPK2,ID2,IRF7,JAG1,JAK2,KMT5A,LAMC2,LGALS3,MYLPF,PCLAF,PIK3R3,PLA1A,PMEPA1,Ptprv,SOX9,SPP1,STAT1,STAT3,SVIL,TFAP2A,UBE2B	291
APC	ENZYME		0.656	8.70x10-8	CCND1,CCND2,CD44,CDKN1A,CLU,CXCL12,CXCL2,ID2,ID3,IGFBP5,JAG1,OGDH,PDK4,PRKCA,SGK1,SOX9,SPP1,TNFRSF11B,ZEB1	299
E2F1	TRANSCRIPTION REGULATOR		0.658	5.00x10-4	ACTR1A,ACTR3,BCL2L11,CCNB1,CCND1,CCND2,CD44,CDKN1A,COX4I1,CSDE1,DUSP1,DUT,Hmgn2 (includes others),ID3,IRS2,MFAP1,OAZ2,PCLAF,PDK4,PSAT1,PTPN4,RBFOX2,RCOR1,RND3,SAFB,SERPINE1,SERTAD2,SLC3A2,TXNL1,UCP2,ULK1,UXT,VCAM1	281
TETRACHLORODIBENZODIOXIN	CHEMICAL TOXICANT		0.662	1.94x10-4	ACTN1,AHRR,ARNT2,ASNS,BTG1,CCND1,CDKN1A,CHST2,CYP1B1,CYR61,EIF4EBP2,ETS2,HSPA1A/HSPA1B,INPP5A,INSIG2,JAG1,JAK2,KRT7,MMP14,PLXNA2,S100A4,SDC1,SERPINE1,SLC4A2,SNAPC2,TGFB2,TIPARP,TUBA8	326
miR-21	MICRORNA		0.664	2.45x10-3	C1R,CCNB1,CDKN1A,CLU,CSNK2A2,GGA3,JAG1,Ncaph,NIFK,PDCD4,SMARCA4,SOD3,SSR1,STAT1,STAT3,TIMP3,TMEM97,Ube2l3,VCAM1	229
CDK5	KINASE		0.67	2.18x10-2	CD14,CDKN1A,NFAT5,RALA
PHORBOL MYRISTATE ACETATE	CHEMICAL DRUG		0.671	1.12x10-3	ABCA7,ATP2A2,AXL,CCND1,CCND2,CD14,CD28,CD44,CDKN1A,CXCL2,CYP7A1,CYR61,DAB2,DUSP1,ECE1,EIF4EBP1,EIF4EBP2,EIF4G1,ELK1,ERRFI1,ETS2,FDX1,FTH1,HJURP,HSPA4,ID2,ID3,IGFBP5,INHBA,IRF7,ISG15,ITGB1,KLF6,LDLR,MMP11,MMP14,MYLPF,MYOG,NFAT5,PALMD,PDCD4,PDK4,PHGDH,PRKCA,PRKX,RAE1,RASA1,SDC1,SERPINA3,SERPINE1,SLC12A2,SMAD6,SOCS3,SPP1,STAT1,STAT3,TNFRSF11B,VCAM1,ZEB1	321
RUNX2	TRANSCRIPTION REGULATOR		0.676	3.83x10-3	CCND1,CDKN1A,DPYSL3,LGALS3,MMP14,NEXN,SERPINE1,SMAD6,SPP1,SVIL,TNFRSF11B	285
IGM	COMPLEX		0.693	6.67x10-3	BCL2L11,CCND2,CD44,CDKN1A,ELK1,ID3,JAK2	265
HIF1A	TRANSCRIPTION REGULATOR		0.704	1.96x10-5	ADAM10,AKAP12,ASNS,ATP2A2,ATP7A,AXL,CCND1,CD44,CDCP1,CDKN1A,CXCL12,CXCL2,CYR61,EIF4G1,FAM53C,FHL2,FSCN1,HSPA4,ID2,IGFBP5,IRS2,NBN,PRKCA,PTGIS,SERPINE1,SOCS3,SOX9,STAT3,TGFB2,TNFRSF11B,TTN,VCAM1	281
miR-34A-5P (and other miRNAS W/SEED GGCAGUG)	MATURE MICRORNA		0.705	2.80x10-3	AXL,CCND1,CD47,CDKN1A,JAG1,NOTCH2,WISP2
CTNNB1	TRANSCRIPTION REGULATOR		0.71	9.25x10-9	ABCC1,ACTR3,AGRN,APOD,BCL2L11,CCND1,CCND2,CD44,CDKN1A,CLU,CNN2,COL4A1,COL4A2,CTNNA1,CXCL12,CXCL2,CYP1B1,CYP51A1,CYR61,DIXDC1,EPHB4,FOXQ1,HNRNPUL1,ID2,ID3,IGFBP5,ITGA6,ITGB1,KRT7,LAMC2,LGALS3,MLLT6,MMP14,MYOG,NFAT5,NRP2,PCCA,RAD23A,S100A4,SCD,SCRN1,SERPINA3,SERPINE1,SERPINE2,SGK1,SLC12A2,SMAD6,SMS,SOX4,SOX9,SPP1,STAT3,TIMP3,TNFRSF11B,UBA1,VCAM1,WISP1,ZEB1	271
IONOMYCIN	CHEMICAL REAGENT		0.71	4.06x10-3	ATP2A2,CCND2,DUSP1,EIF4EBP1,EIF4EBP2,EIF4G1,ETS2,HSPA4,LDLR,NFAT5,SGK1,SLC3A2,SPP1,STAT3	191
RASSF1	OTHER		0.711	9.50x10-4	CCND1,CCND2,CDKN1A,CLU,COL4A1,COL4A2,DAB2,GSN,SOX9,SPP1	274
ADCYAP1	OTHER		0.712	5.20x10-3	ACTN1,Basp1,CFL1,CXCL2,H2AFZ,Hmgn2 (includes others),ID3,NSDHL,SERPINA3,SERPINB1,SERPINE2,SERPINF1,SLC1A3,SOCS3,TGFB2,TGFBI,UCP2	253
S100A9	OTHER		0.718	7.22x10-3	AKAP12,Arl4c,C1S,CCND1,IL33,ISG15,MAG,MMP14,SGK1,SOCS7,TUBA8,VCAM1,WISP2	278
RO31-8220	CHEMICAL - KINASE INHIBITOR		0.726	4.2x10-3	CDKN1A,DUSP1,ITGB1,PDCD4,SERPINE1,VCAM1	228
EPOXOMICIN	CHEMICAL - PROTEASE INHIBITOR		0.728	1.52x10-2	BCL2L11,H2AFZ,IRS2,PSMB4
PANOBINOSTAT	CHEMICAL DRUG		0.734	2.89x10-3	BCL2L11,CCNB1,CCND2,Cdc42,CDKN1A,FLNA	203
VALPROIC ACID	CHEMICAL DRUG		0.749	8.47x10-11	AKR1C3,AMFR,BCL2L11,C8orf44-SGK3/SGK3,CAVIN2,CCND1,CCND2,CD151,CD44,CDKN1A,CXADR,CYP1B1,CYP39A1,CYP51A1,CYR61,DAG1,DHCR7,EIF2S1,ELOVL6,FDFT1,FDPS,FSCN1,ID2,IDI1,INSIG2,LBR,LDLR,MBTPS1,MSMO1,MVD,MVK,NSDHL,PMM2,PSMB4,PSMF1,PXN,S100A4,SC5D,SCD,SERPINE1,SGK1,SPP1,SQLE,STAT3,TBL1X,UBE2H,ZEB1	360
TSC22D3	TRANSCRIPTION REGULATOR		0.759	2.04x10-2	BCL2L11,CCND1,CDKN1A,DUSP1,SGK1
MYBL2	TRANSCRIPTION REGULATOR		0.765	3.29x10-3	BCL2L11,CCNB1,CCND1,CLU,IGFBP5,ITGB1	57
CHOLIC ACID	CHEMICAL - ENDOGENOUS MAMMALIAN		0.766	5.51x10-3	CIRBP,CYP7A1,DHCR7,FDFT1,HMGCR,IGFBP5,RAD23B,SQLE	142
miR-17-5P (and other miRNAS W/SEED AAAGUGC)	MATURE MICRORNA		0.768	2.22x10-2	BCL2L11,BNIP2,CCND1,CCND2,CDKN1A,STAT3
ENTINOSTAT	CHEMICAL DRUG		0.774	2.75x10-2	BCL2L11,CCND1,CDKN1A,DUSP1,GSN,SERPINE1
RBPJ	TRANSCRIPTION REGULATOR		0.777	1.79x10-3	CCND1,CD44,CDKN1A,CXCL12,DUSP1,HMMR,INHBA,JAG1,MYOG,SDC1,SOX4,SOX9,TGFB2	251
IGF1R	TRANSMEMBRANE RECEPTOR		0.783	1.35x10-2	BCL2L11,CDKN1A,CLU,COL4A1,COL4A2,COX4I1,FASN,FTH1,ID2,IGFBP5,IRS2,MYOG,S100A4,Scd2,STAT3,TGFBI,TIMP3
HMGA1	TRANSCRIPTION REGULATOR		0.785	3.93x10-9	CCND1,CCND2,CD44,COL4A1,COL4A2,CYP7A1,CYR61,DAB2,DHCR7,ELK1,FSTL1,GSN,HMGCR,ID3,IDI1,INSIG1,MVD,MVK,NF2,SOD3,SOX4,STAT3,ZYX	269
SMAD7	TRANSCRIPTION REGULATOR		0.803	2.01x10-5	BCL2L11,CCNB1,CDKN1A,COL6A3,GAS6,ID2,ID3,ITGA6,MYLPF,PMEPA1,SCD,SERPINE1,SOX9,TGFB2,TGFBI,TIMP3	283
ADVANCED GLYCATION END-PRODUCTS	CHEMICAL - ENDOGENOUS MAMMALIAN		0.816	6.89x10-4	BSG,CDKN1A,CXCL12,SERPINE1,SERPINF1,SPP1,VCAM1	215
H2AFY	OTHER		0.816	2.89x10-3	CCND2,CDKN1A,FASN,IRF7,NBN,SERPINE1
SASH1	OTHER		0.816	4.26x10-2	CCND2,INHBA,IRF7,ISG15,PLA1A,STAT1
RBL2	OTHER		0.817	1.07x10-2	BCL2L11,CCNB1,CCND1,CDKN1A,ELK1,GRK6,MARK2,UXT,ZEB1
ATP	CHEMICAL - ENDOGENOUS MAMMALIAN		0.818	1.07x10-2	BCL2L11,CCND1,CD14,CXCL2,DUSP1,FLNA,IL33,SERPINE1,VCAM1
STAT3	TRANSCRIPTION REGULATOR		0.823	4.06x10-3	BCL2L11,CCNB1,CCND1,CCND2,CDKN1A,CXCL12,CXCL2,FASN,FSCN1,ID2,IFITM3,IGFBP5,IL6ST,IRF7,ISG15,ITGB1,JAG1,JAK2,NRP2,PLA2G2A,RORA,SERPINA3,SERPINB1,SERPINE1,SERPINE2,SGK1,SLC1A3,SMAD6,SOCS3,STAT1,STAT3,USP7	250
LCAT	ENZYME		0.832	1.00x10-2	CCND1,CLU,HMGCR,LDLR
VITAMIND3-VDR-RXR	COMPLEX		0.842	5.89x10-3	CD14,CDKN1A,IGFBP5,SERPINB1,SPP1,TGFB2
VITAMIN K2	CHEMICAL DRUG		0.849	4.21x10-3	CD14,SERPINB1,SPP1,TNFRSF11B
PRKG1	KINASE		0.849	2.18x10-2	CCND1,CDKN1A,SERPINE1,VCAM1
ROCK2	KINASE		0.849	3.62x10-2	CD44,SERPINE1,SPP1,VCAM1
P38 MAPK	GROUP		0.863	1.98x10-5	ANK1,CCND1,CCND2,CD44,CD82,CDKN1A,CXCL12,CXCL2,DUSP1,ELK1,FLNA,ID3,IGFBP5,INHBA,IRF7,MYLPF,MYOG,NBR1,Nes,RASA1,RND3,SERPINE1,SGK1,SLC18A3,SOCS3,STAT1,TIMP3,TNNC2,ULK1,VCAM1	241
IL6R	TRANSMEMBRANE RECEPTOR		0.864	3.87x10-4	ABCC1,CDKN1A,CXCL2,IGFBP5,IL6ST,SERPINA3,SOCS3,STAT3,TNFRSF11B,VCAM1	234
VHL	TRANSCRIPTION REGULATOR		0.864	7.01x10-3	CCND1,CDCP1,CDKN1A,CFL1,CXCL12,DAB2,FTH1,IFITM3,MMP14,MXI1,SLC1A3	318
CISPLATIN	CHEMICAL DRUG		0.873	1.25x10-3	ANK1,ANXA4,ASNS,ATP6V0C,BCL2L11,CCNB1,CCND1,CD14,CD44,CDCP1,CDKN1A,CLU,DEPDC1B,DUSP1,ECE1,FASN,FNDC3B,GSTM3,HIPK2,HJURP,HMGCR,ID2,IL6ST,ITGB1,LAMC2,LGALS3,PDK4,PHGDH,PLA1A,PRKCA,PURB,PXN,SERPINE1,SOCS3,SPP1,STAT3,TFAP2A,TIMP3,UCP2,VCAM1	271
METHYLPREDNISOLONE	CHEMICAL DRUG		0.879	2.96x10-11	AGO1,AKR1C3,ASAH1,ASNS,ATP1B1,ATP2A2,BTG1,CBLB,CCND1,CCT6A,CD44,CDKN1A,DAB2,DUSP1,ECE1,FDFT1,FSTL1,HSD17B12,HSPA1A/HSPA1B,ID3,IL6ST,INSIG1,IRF7,ITGB1,JAK2,LDLR,MMP11,MVK,NFIB,NSDHL,NUDT4,PJA2,PKIA,PLA1A,PSAT1,RND3,SCAMP1,SDC1,SERPINA3,SERPINB1,SERPINE1,SGK1,SLC25A30,SOD3,STAT1,STAT3,TIMP3,TNKS2,Tsc22d3,UBE2B,VCAM1,Wasl,ZYX	284
ELOVL5	ENZYME		0.88	4.10x10-4	ELOVL6,FADS1,FASN,INSIG2,PDK4,SCD	140
SMARCA4	TRANSCRIPTION REGULATOR		0.881	7.32x10-4	ASNS,CCND1,CD44,CDKN1A,COTL1,DYSF,ELOVL6,ETS2,FAM167A,FHL2,HEPH,ID3,IFITM3,IGFBP5,INHBA,ITGA3,ITGB1,LGALS3,MYLPF,MYOG,MYRF,NR2F2,NRP2,PKIA,RALBP1,SERPINE1,SERPINE2,SMAD6,SMARCA2,SMARCA4,SNAPC2,SOD3,SPP1,ST6GALNAC4,STARD10,TGFB2,TNNC2,UBE2H	310
TCF4	TRANSCRIPTION REGULATOR		0.884	2.74x10-3	CCND1,CDKN1A,ID2,SGK1,SOX9,SPP1,STAT3,WISP2,ZEB1	254
VEGFA	GROWTH FACTOR		0.888	2.28x10-2	ABCC1,CCND1,CDKN1A,CXCL12,CYR61,EPHB4,ETS2,ID3,IGFBP5,ITGB1,KARS,NR2F2,PRKCA,SERPINE1,SMTN,UNC5B,VCAM1
KLF4	TRANSCRIPTION REGULATOR		0.891	1.05x10-2	ANKRD17,ATP2A2,CCNB1,CCND1,CCND2,CD14,CD44,CDKN1A,DUSP1,ID3,IFITM3,INHBA,KRT7,NF2,SERPINE1,SOD3,TGFB2
KLF3	TRANSCRIPTION REGULATOR		0.894	1.95x10-2	ACOT9,ANK1,CIRBP,CSNK1G3,CTNNA1,DRG1,EPRS,FCGRT,GALNT1,GRK6,HYPK,JAK2,KCNK13,RAB33B,SDC1,SGK1,SMCHD1,SNX2,USP7,YTHDF1
T3-TR-RXR	COMPLEX		0.896	3.29x10-3	AKR1C3,COL6A3,CYP7A1,FASN,LDLR,UCP2
PTK2	KINASE		0.899	8.95x10-5	CCND1,CDKN1A,CYR61,LDLR,LPP,PRRX1,SERPINB1,TIMP3,VCAM1	238
DEXAMETHASONE	CHEMICAL DRUG		0.907	1.84x10-11	ABCC1,ACSS2,ACTR3,ADAM10,AKAP12,AKR1C3,APOD,ASNS,ATP1B1,ATP2A2,AUH,BCL2L11,BSG,BTG1,CAVIN2,CCND1,CCND2,CD44,CD47,CDKN1A,CFL1,CGGBP1,CNN2,COL4A1,COL4A2,CXADR,CXCL12,CXCL2,CYP1B1,CYP51A1,CYR61,DUSP1,DUT,ELK1,ELOVL6,ERRFI1,FASN,FDX1,FKBP2,FOXQ1,FSTL1,FTH1,GAS6,GSTM3,GTF2I,HMMR,HSD17B7,ID2,IFITM3,IFRD1,IGFBP5,IL33,IL6ST,ILVBL,INHBA,IRF7,IRS2,ITGB1,JAG1,KHSRP,KLF3,KRT7,LDLR,LGALS3,LSS,LUC7L3,MAPK3,MID…	329
EBF1	TRANSCRIPTION REGULATOR		0.923	7.84x10-3	CBLB,CXCL12,EIF4EBP1,FASN,INPPL1,IRF7,PIK3R3,PRKAR1B,SCD,SOCS3,STAT1	102
BARDOXOLONE	CHEMICAL DRUG		0.927	3.29x10-2	CCND1,CDKN1A,FTH1,UBE2H
THIOACETAMIDE	CHEMICAL TOXICANT		0.937	3.30x10-5	AKAP12,AKR1C3,ANXA4,ASNS,CD14,CD44,CDCP1,CLU,CSRP2,DBN1,FSTL1,GSTM3,HAT1,HSPA4,LAMC2,LGALS3,MMP14,PLA1A,Scd2,SCN1B,SPP1,TRIM25,Tsc22d3	275
miR-122	MICRORNA		0.937	3.95x10-2	ACTR1A,CUX1,CYP7A1,FKBP1A,MTHFD2,NUTF2,PXN
YAP1	TRANSCRIPTION REGULATOR		0.939	2.06x10-3	BCL2L11,CAVIN2,CCND1,CDKN1A,CYR61,ID2,MYOG,SOX9,VCAM1,ZEB1	241
URSODEOXYCHOLIC ACID	CHEMICAL - ENDOGENOUS MAMMALIAN		0.946	2.39x10-2	COL4A1,CYP7A1,FASN,LGALS3,SPP1,TGFB2
CURCUMIN	CHEMICAL DRUG		0.959	3.17x10-5	ABCC1,AXL,BCL2L11,CCNB1,CCND1,CCND2,CD44,CD81,CDKN1A,CTNNA1,FKBP8,FTH1,GRK6,HSPA1A/HSPA1B,IGFBP5,ITGA6,MAPK3,MMP14,NOTCH2,OGDH,PTGIS,SERPINB1,SERPINE1,SOCS3,SOX9,STAT3,TIMP3,UCP2,VCAM1	254
PKC(S)	GROUP		0.965	1.05x10-2	BCL2L11,CDKN1A,CYR61,DUSP1,HMGCR,ID2,ITGB1,KLF6,MAPK3,MYOG,PRKCA,PSCA,SERPINE1,SPP1,VCAM1
MEVALONIC ACID	CHEMICAL - ENDOGENOUS MAMMALIAN		0.967	8.96x10-3	FASN,HMGCR,LDLR,SERPINE1,VCAM1	274
RTN4	OTHER		0.97	1.07x10-2	ACTR1A,CFL1,MAPRE3,RAB3D,RTN4,STAT1
IRF8	TRANSCRIPTION REGULATOR		0.978	8.29x10-3	AHRR,ASAH1,CBL,CD14,CDKN1A,DAB2,ID3,ISG15,KLF6,SOCS7,STAT1	209
TLR7	TRANSMEMBRANE RECEPTOR		0.994	3.88x10-2	CCNB1,CD44,CDKN1A,CREB5,CXCL2,ETS2,IRF7,ISG15,STAT1,ZC3H12A
MTOR	KINASE		1	4.20x10-6	ATP2A2,BCL2L11,CCND1,CDKN1A,COX4I1,EPRS,FASN,FDPS,FKBP1A,IRS2,JAK2,MAG,MLYCD,MYOG,Otub1,PDK3,PDK4,SERPINB1,SLC12A2,SOCS3,SOX4,STAT1,STAT3,TNFRSF11B,TXNL1,UBE2B,VCAM1	293
2-HYDROXY-1-NAPHTHYLALDEHYDE ISONICOTINOYL HYDRAZONE	CHEMICAL REAGENT		1	2.95x10-4	CCNB1,CCND1,CCND2,CDKN1A	154
AZETIDYL-2-CARBOXYLIC ACID	CHEMICAL REAGENT		1	6.57x10-4	ASNS,ATP2A2,CLU,HSPA1A/HSPA1B
GDF9	GROWTH FACTOR		1	1.92x10-3	ID2,ID3,INHBA,ITGA6,PXN,SMAD6	127
T	TRANSCRIPTION REGULATOR		1	2.74x10-3	CD151,CD44,ITGA3,SOX9
3-DEOXY-2-OCTULOSONIC ACID(2)-LIPID A	CHEMICAL - ENDOGENOUS NON-MAMMALIAN		1	2.74x10-3	DHCR7,HMGCR,LSS,SQLE
COPS5	TRANSCRIPTION REGULATOR		1	3.42x10-3	CDKN1A,IFNAR1,MARS,STAT3	145
SMARCD3	TRANSCRIPTION REGULATOR		1	5.11x10-3	CD151,CD44,ITGA3,SOX9
LRPAP1	OTHER		1	5.11x10-3	LDLR,MAPK3,SERPINA3,SERPINE1	169
DAIDZEIN	CHEMICAL DRUG		1	6.34x10-3	AKR1C3,CCND1,GRK6,HMGCR,ID2,IRF7,LDLR,OGDH,SIGLEC10	282
SELPLG	OTHER		1	2.99x10-2	CDKN1A,CXCL2,CYP1B1,STAT6
SELP	TRANSMEMBRANE RECEPTOR		1	3.29x10-2	CDKN1A,CXCL2,CYP1B1,STAT6
ASXL1	TRANSCRIPTION REGULATOR		1	4.31x10-2	PDCD4,RAB12,SCD,SERPINE1
EPAS1	TRANSCRIPTION REGULATOR		1.006	4.48x10-5	AKAP12,AXL,CCND1,CDCP1,CHMP2B,CXCL2,CYP51A1,FASN,HSPA4,IGFBP5,IRS2,LDLR,MMP14,PRKCA,SERPINE1,SLC6A8,SLC7A5,SOX9,TNFRSF11B,WISP2	284
TAMOXIFEN	CHEMICAL DRUG		1.008	4.23x10-5	ASAH1,CCND1,CDKN1A,CLU,CXCL12,CYP7A1,CYR61,FADS1,FASN,FHL2,HMGCR,INPPL1,LDLR,LSS,SCD,Scd2,SCN1B,SERPINA3,SHC1,SLC7A5,SOX9,SPP1,SYNE1,UCP2	261
NFKB (COMPLEX)	COMPLEX		1.009	9.06x10-3	ATP2A2,C1R,CCNB1,CCND1,CCND2,CD44,CD82,CDKN1A,CLU,CXCL12,CXCL2,CYR61,ELK1,FTH1,GAS6,IRF7,ISG15,ITGB1,JAG1,KLF3,MFHAS1,MTSS1,PIP5K1A,PLA2G2A,PXN,SERPINA3,SERPINE1,SLC7A5,SOCS3,SOD3,SPP1,TNFRSF11B,VCAM1,ZC3H12A	275
LY294002	CHEMICAL - KINASE INHIBITOR		1.014	2.74x10-6	ABCC1,ACSS2,ART3,BCL2L11,BSG,CCNB1,CCND1,CCND2,CD14,CD44,CDKN1A,CLCN3,CXCL2,CYR61,DUSP1,ETS2,FASN,FDFT1,Gsta4,GSTM3,HMGCR,IDI1,IGFBP5,IRS2,LAMC2,MMP14,MYOG,NEFH,PLA2G2A,RND3,SCD,SERPINE1,SGK1,SOCS3,SPP1,SQLE,TTN,VCAM1,ZEB1,ZWINT	283
EVEROLIMUS	CHEMICAL DRUG		1.015	2.43x10-2	CCND1,CCND2,CDKN1A,FSCN1
ROMIDEPSIN	BIOLOGIC DRUG		1.016	5.13x10-4	BCL2L11,CCND1,Cdc42,CDKN1A,CXADR,DUSP1,GSN,NF2,TIMP3	278
LAMININ	COMPLEX		1.026	1.09x10-4	CCND1,ETS2,ID2,ITGA6,ITGB1,PXN,SERPINE1,TGFB2	305
HEXACHLOROBENZENE	CHEMICAL TOXICANT		1.026	4.24x10-3	ASNS,CD14,CD44,CLU,LAMC2,LGALS3,SPP1
SNAI1	TRANSCRIPTION REGULATOR		1.029	2.32x10-6	ACTN1,ACTR1A,ACTR3,AXL,CCND1,CCND2,CDKN1A,CFL1,CYR61,FLNA,GSN,ITGB1,MMP14,SDC1,SVIL,ZEB1	288
A23187	CHEMICAL REAGENT		1.039	4.74x10-2	ATP2A2,BCL2L11,CD14,FDX1,ID3,INHBA,SERPINE1,SHC1
CORTICOSTERONE	CHEMICAL - ENDOGENOUS MAMMALIAN		1.04	2.21x10-2	ATP1B1,CCND1,CDKN1A,FASN,ITGB1,PDK4,SGK1,Tsc22d3,UCP2
BROMODEOXYURIDINE	CHEMICAL DRUG		1.044	1.17x10-2	INHBA,IRF7,ISG15,SERPINE1,STAT1,TGFBI
TNF	CYTOKINE		1.049	3.56x10-8	ABCC1,AKAP12,ATP2A2,BCL2L11,BTG1,CCND1,CCND2,CD14,CD28,CD44,CD47,CD82,CDKN1A,CHST2,CLASP1,CLU,CMIP,COL4A3BP,COTL1,CXCL12,CXCL2,CYP1B1,CYP7A1,CYR61,DAG1,DUSP1,ECH1,ELK1,FADS1,FASN,FCGRT,FDPS,FOXO4,FSCN1,FTH1,Gsta4,HIPK2,HMGCR,Hmgn2 (includes others),HPRT1,HSD17B7,HSPA1A/HSPA1B,HSPA4,ID3,IGFBP5,IL33,INHBA,INSIG1,IRF7,IRS2,ISG15,ITGA6,ITGB1,JAG1,KLF6,LAMC2,LDLR,LGALS3,LSS,MFHAS1,MMP14,MYOG,NEFH,NID1…	331
ACLY	ENZYME		1.054	1.04x10-4	ACSS2,FASN,SCD,SDC1
NR3C1	LIGAND-DEPENDENT NUCLEAR RECEPTOR		1.056	1.99x10-4	ACTN1,ATP1B1,BCL2L11,BTG1,C1QTNF2,C1R,CAVIN2,CCND1,CD47,CDKN1A,CXCL2,CYP7A1,CYR61,DAG1,DUSP1,DUT,ERRFI1,HSD17B12,INHBA,ISG15,MAPK3,PDCD4,PDCL3,PIK3R3,PRKAR1B,PRPF40A,RBMS2,RERE,RTN4,SERPINE1,SERTAD2,SGK1,SOX4,SPP1,STAT3,STAT6,TIMP3,TIPARP,TM2D3,TNFRSF11B,VCAM1,WDR6,ZNF346	325
ARACHIDONIC ACID	CHEMICAL - ENDOGENOUS MAMMALIAN		1.063	6.16x10-4	CLU,ELOVL6,FADS1,FASN,INSIG2,KLF6,LDLR,PLA2G2A,SCD,UCP2,VCAM1	149
DIMETHYL SULFOXIDE	CHEMICAL DRUG		1.066	4.21x10-2	CCND2,EIF4EBP1,EIF4EBP2,IRS2,LOXL4,NR2F2,PRKX,TNFRSF11B,VCAM1
MAP2K3	KINASE		1.067	2.19x10-2	ATP2A2,CDKN1A,ISG15,SERPINE1,SGK1,SLC1A3,STAT1
PPP2CA	PHOSPHATASE		1.067	1.69x10-2	BCL2L11,CCND1,CDKN1A,EIF4EBP1,IRF7
FOXP1	TRANSCRIPTION REGULATOR		1.067	2.99x10-2	KCNT1,MTCL1,Rcan1,SOX4
DIO2	ENZYME		1.067	3.29x10-2	ATP2A2,CIRBP,NEFH,SLC1A3
ZVAD-FMK	CHEMICAL - PROTEASE INHIBITOR		1.067	4.31x10-2	CDKN1A,IL6ST,TFAP2A,VCAM1
CCNK	KINASE		1.091	2.18x10-2	CBY1,SMARCC2,UBE2T,UCP2
SEOCALCITOL	CHEMICAL DRUG		1.1	1.66x10-3	ACTR3,CDKN1A,IGFBP5,NBR1,PAPOLA,SGK1,STAT3,STAT6	171
NOCODAZOLE	CHEMICAL REAGENT		1.102	3.36x10-2	CCNB1,CDKN1A,FLNA,MAPK3,PPP4C,SCD,YES1
ADRB	GROUP		1.103	7.72x10-7	ATF5,AXL,CAVIN2,CCND1,CDKN1A,CXCL2,CYP51A1,ENDOD1,FDPS,HSD17B7,INSIG1,LSS,MSMO1,MVD,NBN,NOTCH2,NSDHL,SMAD6,SMC1A	217
CXCR4	G-PROTEIN COUPLED RECEPTOR		1.103	4.67x10-3	AXL,CCND1,CD44,CDKN1A,CXCL12,ID2,ZEB1	232
IL11	CYTOKINE		1.103	1.39x10-2	IL6ST,SERPINA3,SMAD6,SOCS3,SPP1,VCAM1
STAT	GROUP		1.103	3.96x10-2	CDKN1A,IL6ST,SERPINA3,SOCS3
FADD	OTHER		1.108	9.50x10-4	CCND2,CDKN1A,CXCL2,ETNK1,IRF7,KLF6,MYOG,RC3H2,STAT1,TIPARP	176
PROSTAGLANDIN A1	CHEMICAL - ENDOGENOUS NON-MAMMALIAN		1.109	7.29x10-3	CD14,CDKN1A,HSPA1A/HSPA1B,HSPA4	16
DEFEROXAMINE	CHEMICAL DRUG		1.118	8.35x10-4	CCNB1,CCND1,CCND2,CD14,CD47,CDKN1A,DUSP1,FASN,HSPA1A/HSPA1B,IGFBP5,PRKCA,SERPINE1,SERPINE2,SPP1,SPRY4,TGFB2,VCAM1	264
PROSTAGLANDIN E2	CHEMICAL - ENDOGENOUS MAMMALIAN		1.119	7.09x10-3	BCL2L11,BTG1,CCNB1,CCND1,CD14,CD44,CDKN1A,CNNM2,CXCL12,DUSP1,EEA1,FASN,IGFBP5,ITGB1,MBTPS1,MMP14,MXI1,SOCS3,TNFRSF11B,UCP2	230
DUSP1	PHOSPHATASE		1.129	2.95x10-2	CXCL2,DUSP1,MYOG,SERPINE1,SPRYD7,TGFB2,VCAM1,WISP2
MAP2K6	KINASE		1.131	2.78x10-4	ATP2A2,CCND1,CDKN1A,IRS2,ISG15,LDLR,MYOG,PLA2G2A,SLC1A3,STAT1	222
DYRK1A	KINASE		1.131	7.29x10-3	CCNB1,CCND1,CDKN1A,SERPINE1	279
RBM5	OTHER		1.134	1.06x10-3	ATP6V0C,IFITM3,INSIG1,ISG15,ITPA,UBA1,UCP2
DOCK8	OTHER		1.134	1.20x10-2	CCND2,DAB2,INHBA,IRF7,ISG15,PLA1A,STAT1
CAFFEIC ACID PHENETHYL ESTER	CHEMICAL DRUG		1.148	9.50x10-4	CCND1,CD44,CDKN1A,ELK1,FCGRT,FTH1,KLF6,MMP14,STAT3,TCP1,VCAM1	222
GAB2	OTHER		1.154	2.70x10-2	ELK1,GSN,SERPINE1,ZEB1
ISOBUTYLMETHYLXANTHINE	CHEMICAL TOXICANT		1.155	6.65x10-3	CCND1,CD14,CD44,CDKN1A,HSD17B7,MAPK3,RAB5C,SCD,Scd2,SERPINE1,SGK1,TIMP3	231
HTT	TRANSCRIPTION REGULATOR		1.181	1.61x10-4	AGRN,AKAP12,AP1S1,ATP2A2,BCL2L11,C1R,CCND1,CDKN1A,COL4A1,COL4A2,COL6A3,COX4I1,CYP51A1,DHCR7,FASN,FDFT1,FDPS,GSN,HMGCR,IGFBP5,ITGB1,LDLR,MBTPS1,MMP14,NDUFB2,NEFH,NFIB,NFIC,PSMB4,PURB,Scd2,SERPINA3,SERPINF1,SGK1,SLC12A2,SLC18A3,SLC1A3,SORT1,SPP1,TGFBI,TIMP3,UBE2H,UCHL3,VCAM1,WISP1	316
NUPR1	TRANSCRIPTION REGULATOR		1.183	1.78x10-4	AGRN,AKAP12,ANK1,ARHGAP11A,BTG1,CHTF8,CNPY4,CREB5,CXADR,CYR61,ERMP1,FAM111A,FHL2,GRAMD2B,HIST1H4A,HJURP,IRS2,KANK2,KLF6,LBR,NEK9,NFIB,OSBPL6,PHTF1,PRELID2,RAB11FIP5,SAFB,SERPINE1,SERTAD2,SPATS2L,SPC24,SPC25,TFAP2A,TNS3,UNC5B
TROGLITAZONE	CHEMICAL DRUG		1.189	5.49x10-3	CCNB1,CCND1,CCND2,CDKN1A,CFL1,COL4A1,CYP7A1,ECH1,ELK1,FASN,HIPK2,HMMR,IFRD1,ITGA6,NR2F2,PDK4,SCD,SDC1,SEPT7,SERPINE1,SPP1,TSN,UCP2,VCAM1	245
MYD88	OTHER		1.192	5.35x10-4	CCNL2,CD14,CD44,CXCL12,CXCL2,CYR61,DUSP1,ETS2,IGFBP5,INHBA,IRF7,ISG15,JAG1,MMP14,Nes,SERPINE1,SOCS3,SPP1,VCAM1,WISP1,ZC3H12A	266
CRTC2	OTHER		1.192	1.00x10-2	CCND1,SMAD6,SMARCA2,SMARCA4
WT1	TRANSCRIPTION REGULATOR		1.193	5.09x10-6	ACTN1,ASNS,CCND1,CDKN1A,CIRBP,COL4A1,DYRK1A,FDFT1,FDPS,GSN,IDI1,LGALS3,LSS,MBTPS1,MMP14,NUCB1,Scd2,SDC1,SERPINE1,SMC1A,SOX9,SQLE,TFAP2A,TIMP3	156
AICAR	CHEMICAL - ENDOGENOUS MAMMALIAN		1.193	1.49x10-3	CCNB1,CDKN1A,FASN,FOXO4,PDK4,SCD,SERPINE1,SOCS3	223
ALDH2	ENZYME		1.195	1.14x10-3	ATF5,Gsta4,MTHFD2,PHGDH,PSAT1,SLC3A2,SLC7A5
HSP27	GROUP		1.195	2.54x10-3	CCND1,CD14,CDKN1A,EIF4EBP1,PLA2G2A,STAT3	247
NKX2-5	TRANSCRIPTION REGULATOR		1.21	4.69x10-2	CBY1,ECE1,GJA5,Nes
IL6	CYTOKINE		1.214	8.00x10-5	ABCC1,ATP2A2,BCL2L11,CCNB1,CCND1,CD14,CD44,CD82,CDKN1A,CLU,COX4I1,CXCL2,CYP1B1,DUSP1,ETS2,FCGRT,FSCN1,Gsta4,ID2,IFITM3,IGFBP5,IL6ST,ITGB1,JAK2,LDLR,MRVI1,NUCB2,PCLAF,PLA2G2A,RASA1,RORA,SBNO2,SC5D,SERPINA3,SERPINE1,SGK1,SLC12A2,SOCS3,SPC25,SPP1,STAT1,STAT3,SV2B,TNFRSF11B,TRAF6,TTK,VCAM1	277
ID2	TRANSCRIPTION REGULATOR		1.219	4.76x10-4	BCL2L11,CCNB1,CCND1,CCND2,CD44,CDKN1A,DUSP1,ETS2,JAK2,KLF6,NFAT5,RORA,SDC1,SOCS3,SOX4,ZEB1	246
UTP	CHEMICAL - ENDOGENOUS MAMMALIAN		1.221	2.66x10-4	CD14,FLNA,MYLPF,SERPINE1,SPP1,VCAM1	260
TWIST1	TRANSCRIPTION REGULATOR		1.224	3.87x10-5	APOD,CD44,CDKN1A,CLU,CXCL12,GSN,IGFBP5,PAM,PRRX2,PXDN,SPP1,TGFBI,TIMP3,UNC5B,WISP1,ZEB1,ZYX	226
C5	OTHER		1.225	2.74x10-3	CXCL2,ITGB1,SOCS3,STAT3	206
CARBON TETRACHLORIDE	CHEMICAL TOXICANT		1.234	1.89x10-2	ABCC1,AOX1,CDKN1A,DUSP1,FKBP1A,Flt1,Gsta4,IGFBP5,ITGB1,MAPK3,SPP1,TGFB2,TIMP3,VCAM1
TNFSF11	CYTOKINE		1.238	1.03x10-3	AHRR,BSG,CCND1,CD14,CD44,CDKN1A,DAB2,DUSP1,FHL2,HIPK2,IFRD1,SDC1,SERPINE1,SOCS3,SPP1,STAT1,TNFRSF11B,TRAF6,TTK,VCAM1	268
PRKCA	KINASE		1.25	2.82x10-4	CCND1,CDKN1A,CXCL2,HSPA1A/HSPA1B,ID2,ID3,INSIG1,MYLPF,SCAMP1,SDCBP,SERPINE1,TGFB2,VCAM1	262
TCF7L2	TRANSCRIPTION REGULATOR		1.259	1.10x10-6	APOD,CCND1,CCND2,CDKN1A,CREB5,CTNNA1,CYP51A1,CYP7A1,ERF,FKBP1A,Foxn3,FTH1,GRAMD2B,GSN,HIPK2,ID2,ID3,IRS2,JAG1,KMT5A,LAMC2,MAG,MYRF,NUDT4,RAB31,SC5D,SLC12A2,SLC44A1,SMIM15,SPP1,WISP2	252
TROVAFLOXACIN	CHEMICAL DRUG		1.265	1.53x10-4	CDKN1A,CXCL2,CYP7A1,ERRFI1,ETS2,FASN,LDLR,SERPINE1,SOCS3,STAT3	205
MKNK1	KINASE		1.265	3.49x10-3	AGRN,CYR61,DPYSL3,FLNA,IFRD1,ISG15,NCDN,PDLIM5,PLXNB2,PRKAR1B
PREDNISOLONE	CHEMICAL DRUG		1.265	3.85x10-3	ATG16L1,ATG3,BNIP2,BTG1,DUSP1,EIF4G1,GABARAPL2,IRS2,MRPS16,RNF111,SGK1,SOD3,SPP1,STAT1,TMEM43,TNFRSF11B,ULK1	299
CCND1	TRANSCRIPTION REGULATOR		1.265	9.99x10-3	AHI1,CCND1,CCND2,CD44,CDKN1A,DYNC1LI1,ENDOD1,ERRFI1,FLNA,GPC6,HJURP,HSPA1A/HSPA1B,ID3,PCLAF,PDCD4,PMEPA1,PSMC3IP,SOX4,SPC25,SPP1,TM7SF2	278
IFN	GROUP		1.285	3.83x10-3	CD44,CFH,IFITM3,IFNAR1,IL33,IRF7,ISG15,SERPINE1,SPP1,STAT1,XDH	281
COBALT CHLORIDE	CHEMICAL REAGENT		1.287	1.71x10-2	ATP7A,CDKN1A,CLU,CYP1B1,DUSP1,SERPINF1,SLC1A3
NME1	KINASE		1.289	1.86x10-2	CCND1,CDKN1A,MMP14,RAE1,SERPINE1
CD3	COMPLEX		1.318	3.04x10-3	ACTR3,AP1B1,BCL2L11,BTG1,C1R,CBL,CCND1,CCND2,CD28,CD44,DYRK1A,ETS2,FDPS,FKBP1A,FKBP2,GABARAPL2,HAT1,HSPA1A/HSPA1B,ID3,IGFBP5,JAK2,MTHFD2,NFAT5,OGDH,PSMF1,RAD23B,RORA,SHC1,SMS,SOCS3,STAT1,STEAP2,STRN3,TRA2A,TRAF6,TRIM25,YES1	262
GDF2	GROWTH FACTOR		1.322	1.24x10-3	CXCL12,ID2,ID3,SERPINE2,SERPINF1,SLC18A3,SLC3A2,SMAD6,SPP1,VCAM1	221
MIR-291A-3P (AND OTHER MIRNAS W/SEED AAGUGCU)	MATURE MICRORNA		1.333	1.40x10-2	ANKRD52,BAZ1A,CCND1,CCND2,CD44,CDKN1A,FYCO1,INSIG2
IL1B	CYTOKINE		1.342	2.45x10-4	ATF5,ATP2A2,C1R,CD14,CD44,CD82,CDKN1A,CXCL12,CXCL2,CYP7A1,DAB2,DUSP1,ERRFI1,ETS2,GAS6,Hmgn2 (includes others),HPRT1,HSPA1A/HSPA1B,ID3,IFRD1,IGFBP5,IL33,INHBA,IRF7,IRS2,ISG15,ITGB1,LAMC2,LDLR,MMP11,MMP14,MYOG,NFAT5,PLA2G2A,PTGIS,RORA,SDC1,SERPINA3,SERPINE1,SLC1A3,SOCS3,SOX9,SPP1,STAT1,STAT3,STAT6,TIMP3,TNFRSF11B,TRAF6,VCAM1,ZC3H12A,ZYX	256
BETA-CAROTENE	CHEMICAL - ENDOGENOUS MAMMALIAN		1.342	1.25x10-2	ACSS2,ELOVL6,HSPA1A/HSPA1B,MID1IP1,Scd2
HOXC6	TRANSCRIPTION REGULATOR		1.342	1.69x10-2	ERRFI1,SEPT7,SLC1A3,SLC44A1,VCAM1
PYRIDABEN	CHEMICAL TOXICANT		1.342	4.75x10-2	DIP2B,INHBA,LAMC2,NFAT5,NFIB
PML	TRANSCRIPTION REGULATOR		1.343	2.01x10-3	ANXA4,CCND1,CDKN1A,CFL1,FASN,HMGCR,ID2,LDLR,PDK4,PRKCA,SCD,UCP2	318
MYB	TRANSCRIPTION REGULATOR		1.371	3.70x10-2	CCNB1,CCND1,COL4A1,CXCL12,IGFBP5,MMP11,MTSS1,SDC1,SPP1
STREPTOZOCIN	CHEMICAL DRUG		1.372	2.11x10-2	ATP1B1,CLU,COL4A1,CYP7A1,ELOVL6,FASN,Gk,INSIG2,IRS2,LGALS3,SCD,SERPINE1,SOD3,SPP1
PRL	CYTOKINE		1.375	7.16x10-7	ACTR3,ADAR,AKR1C3,ARF3,ATP2A2,CCNB1,CCND1,CDKN1A,CLU,COX4I1,HSD17B7,ID2,ID3,IGFBP5,IRF7,ISG15,JAK2,MARS,MMP14,N4BP1,PDK4,SDC1,SERPINA3,SOCS3,SPP1,STAT1,TRIM25,XDH	306
TCR	COMPLEX		1.377	8.56x10-5	APOD,BCL2L11,BSG,CBL,CBLB,CD28,CD44,EBNA1BP2,FLNA,ID3,IFNAR1,IRF7,ISG15,LBR,N4BP1,PDCD4,PIK3R3,PXN,SDCBP,SNRPD3,SOCS3,SPP1,STAT1,STAT3,ZNFX1	222
DOCOSAHEXAENOIC ACID	CHEMICAL DRUG		1.384	2.25x10-4	ACSS2,CD44,CDKN1A,ELOVL6,FADS1,FASN,INSIG2,LDLR,SCD,SDC1,SERPINE1,SMAD6,SOCS3,TGFB2,UCP2,VCAM1	236
MEDROXYPROGESTERONE ACETATE	CHEMICAL DRUG		1.384	4.04x10-2	CCNB1,CCND1,CD44,CYR61,FASN,ITGB1,SCD,SGK1,SPC25
TRIAMCINOLONE ACETONIDE	CHEMICAL DRUG		1.386	6.25x10-4	AUH,BCL2L11,CD44,CXADR,DUSP1,ELK1,HIPK2,IL6ST,INSIG1,IRF7,LDLR,MED6,RNF41,SCD,SERPINA3,SOX4,SPP1,TGFB2	173
SIRT1	TRANSCRIPTION REGULATOR		1.387	5.40x10-4	ARNT2,CCND1,CCND2,CDKN1A,EPDR1,FASN,H2AFZ,HMGCR,KDM5B,LDLR,MVK,MYOG,PDK4,Scd2,SERPINE1,STAT3,TIMP3,UCP2,Wasl,ZEB1	140
ADRB2	G-PROTEIN COUPLED RECEPTOR		1.387	2.04x10-2	ATP1B1,CYP1B1,FASN,SPP1,TNFRSF11B
LIF	CYTOKINE		1.387	2.66x10-2	CCND1,CDKN1A,CXCL2,GRAMD2B,IL6ST,MYOG,Nes,RASA3,SERPINA3,SOCS3,SPP1,STAT3,TNFRSF11B
DNMT3B	ENZYME		1.387	2.80x10-2	CDKN1A,CYP1B1,EPDR1,MAPRE3,Rhox5,SAFB,STAT1,TIMP3
BENZO(A)PYRENE	CHEMICAL TOXICANT		1.388	1.87x10-5	ABHD4,AJUBA,BCL2L11,C1QTNF2,CDKN1A,CYP1B1,CYR61,FASN,Gsta4,Hist1h1e,HSPA1A/HSPA1B,INHBA,MXD3,PGD,PRKCA,RAE1,RSRP1,SERPINE1,SOD3,TAF6,TGFB2,ZWINT	262
AM 580	CHEMICAL TOXICANT		1.4	6.16x10-3	APOD,DUSP1,ITGA6,PDCD4,SOX9	115
NR0B2	LIGAND-DEPENDENT NUCLEAR RECEPTOR		1.403	4.67x10-3	CDKN1A,CYP51A1,CYP7A1,FASN,HMGCR,PDK4,SCD,SERPINE1	181
ACVRL1	KINASE		1.408	2.28x10-6	CDKN1A,CXCL12,ID2,PXN,SERPINE1,SMAD6,STAT1,VCAM1,ZYX	204
ETV5	TRANSCRIPTION REGULATOR		1.408	9.19x10-4	CCND1,CTNNA1,CXCL12,ITGB1,KRT7,SPP1,ZEB1	131
CFTR	ION CHANNEL		1.411	4.07x10-5	ASNS,CFH,CYP4V2,FADS1,FDFT1,FDPS,IDI1,SCD,Scd2,SOCS3,SQLE,STAT1	93
HNF1A	TRANSCRIPTION REGULATOR		1.412	1.09x10-2	Akr1c19,AKR1C3,ANXA4,ARHGAP11A,ATG3,ATP7A,C1S,CCND1,CYP4V2,CYP7A1,EIF4EBP2,GNG12,HMGCR,IFNAR1,LDLR,MID1IP1,NBR1,OGDH,PLA1A,RAB33B,SERPINE1,SLC38A4,SLC4A2,SOCS3,TROVE2,UCP2
CARBOPLATIN	CHEMICAL DRUG		1.414	5.78x10-4	ASNS,CD44,CDCP1,CLU,LAMC2,LGALS3,PLA1A,SPP1	124
GENTAMICIN C	CHEMICAL DRUG		1.414	1.84x10-3	ASNS,CD14,CD44,CLU,LAMC2,LGALS3,PLA1A,SPP1
5-O-MYCOLYL-BETA-ARAF-(1->2)-5-O-MYCOLYL-ALPHA-ARAF-(1->1')-GLYCEROL	CHEMICAL - ENDOGENOUS NON-MAMMALIAN		1.414	1.15x10-2	CD44,CHST2,CXCL2,DUSP1,RND3,SERPINE2,SOCS3,VCAM1
GNRH ANALOG	BIOLOGIC DRUG		1.422	7.69x10-5	ABCC1,ACTN1,CUX1,DUSP1,EIF4EBP1,FCGRT,FKBP1A,HEBP2,INHBA,KDSR,MAPK3,N4BP1,NARS,NBN,NUTF2,PDLIM5,PIK3R3,PSMB4,PSMC3IP,RAB5C,RALA,RBMS2,SNRPD3,SSR1,TNS2,WSB2,YIF1A
IL17A	CYTOKINE		1.426	2.93x10-3	CCND1,CD14,COTL1,CXCL12,CXCL2,CYR61,IL33,ISG15,JAG1,KLF3,PLXNB2,SOCS3,STAT3,TNFRSF11B,TRAF6,VCAM1,ZC3H12A	292
GLUTAMINE	CHEMICAL - ENDOGENOUS MAMMALIAN		1.446	1.00x10-2	ASNS,ATF5,BSG,CCND1,DUSP1,DYRK1A,HSPA1A/HSPA1B,PYCR1
MMP2	PEPTIDASE		1.45	3.38x10-5	CCND1,CD44,CDKN1A,CXCL12,IL6ST,IRF7,ITGA3,JAK2	266
CAT	ENZYME		1.452	3.60x10-2	CDKN1A,CYP1B1,HSPA4,SERPINE1,VCAM1
CDX1	TRANSCRIPTION REGULATOR		1.452	3.87x10-2	CCND1,CCND2,CLU,FOXQ1,HEPH
SMAD1	TRANSCRIPTION REGULATOR		1.455	2.89x10-3	CDKN1A,COL4A1,CXCL2,SMAD6,SOX9,SPP1	296
INDOMETHACIN	CHEMICAL DRUG		1.463	5.78x10-5	ASNS,BSG,CCNB1,CCND1,CD14,CD44,CDKN1A,CLU,FASN,GSTM3,IFITM3,LAMC2,LDLR,LGALS3,MMP14,PLA1A,PRKCA,SDC1,SLC7A5,SPP1,TRAF6,UCP2	304
WORTMANNIN	CHEMICAL - KINASE INHIBITOR		1.477	4.73x10-2	BCL2L11,CCND2,CD14,CD44,CDKN1A,FASN,IRS2,MMP14,PXN,SERPINE1,SOCS3,VCAM1
TICAM1	OTHER		1.509	1.26x10-2	CCNL2,CXCL2,DUSP1,ETS2,IRF7,ISG15,JAG1,Nes,SERPINE1,SOCS3,VCAM1
PRKCZ	KINASE		1.519	5.38x10-3	CCND1,MAPK3,PHGDH,PSAT1,VCAM1	238
miR-155-5P (miRNAS W/SEED UAAUGCU)	MATURE MICRORNA		1.527	1.64x10-5	ATG3,CCND1,CD47,CUX1,CXCL2,CYP51A1,CYR61,FADS1,HSD17B12,NARS,PDLIM5,RAB5C,RCOR1,SCAMP1,SDCBP,SERPINE1,TM6SF1,TRAM1
RET	KINASE		1.534	1.99x10-4	ANXA4,AUH,CCND1,CD151,CLU,CXCL12,HSPA1A/HSPA1B,ITGA6,MMP14,RTN4,SCARA3,TIMP3,UBQLN2	304
CALCITRIOL	CHEMICAL DRUG		1.536	4.68x10-7	ADAM19,AGPAT5,BNIP2,CCNB1,CCND1,CD14,CDKN1A,COL4A1,COL4A2,CXCL2,CYP7A1,CYR61,DUSP1,ECH1,ERRFI1,ETFB,FASN,FDPS,FDX1,H2AFZ,Hmgn2 (includes others),ID2,IGFBP5,IRF7,ISG15,MYOG,NDC1,NDUFB2,NRM,PALMD,PCLAF,PDCD4,PDK3,PDK4,PMEPA1,PRKCA,PYCR1,SERPINB1,SOCS3,SPP1,SUV39H1,TGFB2,TNFRSF11B,TSHZ3,UCP2	298
ANDROGEN	CHEMICAL DRUG		1.539	1.14x10-3	AKR1C3,APOD,CCND1,CD44,COL4A2,FLNA,GSN,IGFBP5,INHBA,PSCA,SDC1,SOX4,SOX9,STAT3,STEAP1	233
MAPK8	KINASE		1.548	2.21x10-2	APOD,BCL2L11,CCND1,CDKN1A,CYP7A1,DUSP1,ELK1,FOXO4,FTH1,Gk,KLF6,MYOG
SALMONELLA MINNESOTA R595 LIPOPOLYSACCHARIDES	CHEMICAL - ENDOGENOUS NON-MAMMALIAN		1.575	4.35x10-3	AXL,C8orf44-SGK3/SGK3,CCNL2,CXCL2,ETS2,ISG15,JAG1,Nes,SERPINE1,SOCS3,VCAM1	277
VANCOMYCIN	BIOLOGIC DRUG		1.581	2.26x10-6	ASNS,CD14,CD44,CDCP1,CLU,CXCL2,GSTM3,LAMC2,LGALS3,PLA1A,RTN4,SCD,SOD3,SPP1
CAPTOPRIL	CHEMICAL DRUG		1.584	1.61x10-3	ASNS,CD44,CLU,CSRP2,GSTM3,LAMC2,LGALS3,SPP1,TGFB2	196
FORSKOLIN	CHEMICAL TOXICANT		1.589	3.49x10-4	ACTN1,AKAP12,ATP1B1,ATP6V0C,BCL2L11,CCNB1,CCND1,CCND2,CD14,CD44,CDKN1A,CLU,CXCL2,CYP1B1,DAB2,DHCR7,DUSP1,FDX1,HSD17B7,HSPA1A/HSPA1B,ID2,ID3,IGFBP5,INHBA,IRS2,ITGA3,MAPK3,MSMO1,PDK4,PRKX,RAB31,RAB33B,RAB5C,SERPINE1,SGK1,SHC1,SPP1,STAT1,STAT3,TNFRSF11B,UCP2,ZEB1	257
LEP	GROWTH FACTOR		1.598	1.29x10-4	ASAH1,ATP2A2,CCND1,CD14,CDKN1A,COL4A1,CYP7A1,CYR61,ECH1,ELOVL6,FASN,FDX1,HMGCR,IFT27,IRS2,JAK2,LDLR,MMP14,MSMO1,MYOG,SC5D,SCD,Scd2,SERPINE1,SOCS3,SPP1,STAT3,TIMP3,TMED9,TNFRSF11B,UCP2,VCAM1	223
TP53	TRANSCRIPTION REGULATOR		1.625	1.84x10-14	ABCC1,ABHD4,ACTN1,AKAP12,ANK1,ANXA4,AP1B1,ARHGAP5,ASNS,BCL2L11,BTG1,CCNB1,CCND1,CCND2,CD44,CD47,CD81,CD82,Cdc42,CDKN1A,CLU,CNN2,COL4A1,COL4A2,CXCL12,CYP51A1,CYR61,DHCR7,DUSP1,DUT,DYRK1A,ECH1,FASN,FDFT1,FDPS,FHL2,FKBP1A,FSTL1,GAS6,GOLGA4,GSN,H2AFZ,HJURP,HMGCR,Hmgn2 (includes others),HMMR,HSPA1A/HSPA1B,ID2,ID3,IGFBP5,INHBA,IRF7,ISG15,LBR,LGALS3,LPP,LSS,MAPK3,MAPRE3,MED13L,MVD,MVK,NARS,NDRG4,PCCA,PC…	295
PHENACETIN	CHEMICAL DRUG		1.664	3.72x10-3	CD44,CLU,LAMC2,LGALS3,PLA1A,SPP1
MAVS	OTHER		1.664	5.14x10-3	ADAR,CXCL2,IFITM3,IRF7,ISG15,SOCS3,STAT1	182
ENALAPRIL	CHEMICAL DRUG		1.667	8.95x10-5	ASNS,CLU,Flt1,GSTM3,LGALS3,SERPINE1,SPP1,UCP2,VCAM1	246
SLC13A1	TRANSPORTER		1.667	5.91x10-3	AKR1C3,ELOVL6,GPC6,INSIG1,MPP6,MVD,SCD,SLC38A4,SPP1
TOB1	TRANSCRIPTION REGULATOR		1.673	6.55x10-3	CCND1,CDKN1A,HJURP,NBR1,RBBP6,UBE2T
KDM1A	ENZYME		1.675	2.69x10-2	CCND2,CDKN1A,DDR2,FASN,ID2,PSAT1,SCD
BMP2	GROWTH FACTOR		1.696	1.01x10-3	BSG,CCND1,CDKN1A,CXCL12,ID2,ID3,IGFBP5,MYOG,NFAT5,PLXNA2,SMAD6,SOX9,SPP1,TBC1D10A,TIMP3,TNFRSF11B,TNN	261
SIROLIMUS	CHEMICAL DRUG		1.703	3.02x10-6	ASNS,ATP6V0C,BCL2L11,CCND1,CCND2,CD151,CDKN1A,EIF2S1,FASN,FSCN1,FTH1,GGA2,HIST1H4A,HSPA4,ID2,IDI1,IGFBP5,IRF7,IRS2,ISG15,LGALS3,MMP14,MYOG,PDCD4,PRKCA,PSMB4,RPN2,S100A4,SCD,SERPINE1,SLC25A38,SLC3A2,SOCS3,SQLE,STAT1,TNFRSF11B,TRIM25,UBA1,UCP2,VCAM1	290
URSOLIC ACID	CHEMICAL DRUG		1.706	3.24x10-5	CCND1,CDKN1A,EIF3C,EIF4EBP1,FASN,MARS,NARS,PDCD4,STAT3,VCAM1	339
TLR	GROUP		1.718	2.32x10-2	DUSP1,ID2,IL33,IRF7,JAG1,NOTCH2,SOCS3,STAT1,ZC3H12A
NFATC2	TRANSCRIPTION REGULATOR		1.718	4.35x10-2	CCNB1,CDKN1A,DAB2,INHBA,IRF7,ISG15,PLA2G2A,SLC3A2,SOCS3,STAT1
IRF1	TRANSCRIPTION REGULATOR		1.72	5.62x10-3	C1R,CCNB1,CCND1,CDKN1A,CXCL2,IFITM3,IRF7,ISG15,JAK2,SOCS7,STAT1,STAT3,VCAM1	241
PROGESTERONE	CHEMICAL - ENDOGENOUS MAMMALIAN		1.731	5.83x10-5	AKR1C3,APOD,ART3,ATP1B1,BSG,CCNB1,CCND1,CD82,CDKN1A,CHERP,CXCL12,CYP1B1,ERRFI1,FTH1,GAS6,GRINA,HMGCR,HSPB11,ID3,IGFBP5,INHBA,IRS2,ITGA11,ITGB1,KRT7,LGALS3,MTSS1,PDK3,PIP5K1A,RAB11FIP5,RTN4,SCD,Scd2,SGK1,SPP1,STEAP1,TGFB2,TGFBI,TIMP3,TIPARP,TNS2,WISP2,XDH,ZEB1	294
SALMONELLA ENTERICA SEROTYPE ABORTUS EQUI LIPOPOLYSACCHARIDE	CHEMICAL TOXICANT		1.732	2.04x10-2	ASNS,ATP1B1,CXCL2,ETS2,ID2,INHBA,ISG15,OAZ2,PLA1A,RIN2,SLC1A3,SOCS3
E. COLI B5 LIPOPOLYSACCHARIDE	CHEMICAL - ENDOGENOUS NON-MAMMALIAN		1.743	1.35x10-2	CCND1,CD44,CDKN1A,CXCL2,CYP7A1,DUSP1,ERRFI1,ETS2,FASN,IL6ST,LDLR,SDC1,SERPINE1,SOCS3,SPP1,STAT3,TGFB2
FENAMIC ACID	CHEMICAL REAGENT		1.765	1.73x10-4	ASNS,CD14,CD44,CDCP1,CLU,GSTM3,LAMC2,LGALS3,PLA1A,SPP1
PGR	LIGAND-DEPENDENT NUCLEAR RECEPTOR		1.776	8.43x10-6	AKR1C3,ATP1B1,BTG1,CCNB1,CCND1,CD44,CDKN1A,GAS6,GSTM3,HSPB11,IGFBP5,IRS2,ITGA6,ITGB1,MTSS1,PRRX1,SDC1,SGK1,SLC7A5,STAT1,STAT3,STEAP1,TGFBI,TIPARP,WISP2,ZEB1	352
N-COR	GROUP		1.78	1.48x10-3	CCND1,CDKN1A,CXCL2,ELOVL6,FASN,Gk,SCD,Scd2,SGK1,SLC44A1	314
TRIAMTERENE	CHEMICAL DRUG		1.803	1.18x10-4	ASNS,CD14,CD44,CDCP1,CLU,GSTM3,LAMC2,LGALS3,PLA1A,SPP1
ST1926	CHEMICAL DRUG		1.807	7.87x10-4	CCT6A,CDKN1A,CFL1,EIF3E,H2AFZ,ITGA11,KARS,NARS,PCLAF,PSMF1,PURB,RPL36AL,SEPT7,SOX4,UXT
ABCA1	TRANSPORTER		1.808	7.31x10-3	CYP51A1,FDFT1,HMGCR,LDLR
IFN GAMMA	COMPLEX		1.818	8.86x10-3	ADAR,CDKN1A,IGFBP5,IL33,JAK2,SOCS3,SOCS7,STAT1,TGFB2	234
CCL5	CYTOKINE		1.826	1.09x10-3	CD44,CXCL2,CYP1B1,DUSP1,MAPK3,SGK1,SQLE,STAT1,STAT3	265
CD44	OTHER		1.858	1.37x10-4	CCND1,CCND2,CD44,CDKN1A,CLU,CXADR,FASN,HMMR,ITGA3,LGALS3,MMP14,PDCD4,PMEPA1,SPP1,STEAP1,TRAF6,VCAM1,ZEB1,ZYX	311
5-FLUOROURACIL	CHEMICAL DRUG		1.88	2.79x10-3	ANXA4,BCL2L11,CCND1,CCT6A,CDKN1A,CLU,EIF3C,EIF3E,FDPS,FKBP1A,GSN,GTF2I,KARS,NDUFS8,NOP56,RAE1,SERPINB1,SMS,SUB1	288
5-AZACYTIDINE	CHEMICAL DRUG		1.884	3.75x10-4	CD44,CTNNA1,CXCL12,DUSP1,ECH1,INHBA,IRF7,IRS2,KLF6,SHC1,SLC3A2,SLC7A5,SOCS3,SOX9,ZYX
ETHIONINE	CHEMICAL TOXICANT		1.89	4.31x10-4	CD14,CD44,CLU,LAMC2,LGALS3,PLA1A,SPP1
LOMUSTINE	CHEMICAL DRUG		1.897	9.06x10-5	ASNS,CD14,CD44,CDCP1,CLU,GSTM3,LAMC2,LGALS3,PLA1A,SPP1
ALLOPURINOL	CHEMICAL DRUG		1.897	8.66x10-4	ASNS,CD14,CD44,CDCP1,CLU,GSTM3,LAMC2,LGALS3,PLA1A,SPP1
PP2/AG1879 TYROSINE KINASE INHIBITOR	CHEMICAL - KINASE INHIBITOR		1.915	1.60x10-2	BCL2L11,CBL,CDKN1A,DUSP1,MYOG,SERPINE1,SPP1
IFNAR	GROUP		1.915	3.95x10-2	AXL,IFITM3,IRF7,ISG15,SPP1,STAT1,VCAM1
SORAFENIB	CHEMICAL DRUG		1.937	3.96x10-2	ATF5,CCND1,CCND2,ZEB1
ID3	TRANSCRIPTION REGULATOR		1.941	2.03x10-3	BCL2L11,CCNB1,CCND2,CD44,CDKN1A,DUSP1,ELOVL6,ETS2,ID3,JAK2,KLF6,NFAT5,RORA,SOCS3,SOX4	175
SRC (FAMILY)	GROUP		1.941	3.10x10-2	GRK6,PXN,S100A4,STAT1,VCAM1
SPIRONOLACTONE	CHEMICAL DRUG		1.941	0.31x10-1	CDKN1A,FASN,SCD,TIMP3
ALVOCIDIB	CHEMICAL DRUG		1.947	5.08x10-2	CCNB1,CCND1,CDKN1A,SF3B1
HDAC3	TRANSCRIPTION REGULATOR		1.948	1.02x10-4	CCNB1,CCND1,CD82,CDKN1A,CXCL2,ELOVL6,FASN,FITM1,SCD,SERPINE1,SMARCA2,SPP1	194
DESMOPRESSIN	BIOLOGIC DRUG		1.951	4.38x10-2	FLNA,GNG12,HSPA1A/HSPA1B,NFAT5,PXN,SORT1,Tpi1 (includes others)
CEBPB	TRANSCRIPTION REGULATOR		1.957	7.65x10-5	AKR1C3,ASNS,CCND1,CCND2,CD14,CDKN1A,CIRBP,CXCL2,DAB2,DHCR7,DYNLT1,FHL2,HIST1H4A,IFITM3,IRS2,LDLR,MMP11,NDRG4,PDK4,PLA2G2A,PLAC1,RORA,SCD,SERPINE1,SGK1,SLC12A2,SOCS3,SPP1,STAT3,XDH,ZYX	274
DDX58	ENZYME		1.958	1.56x10-1	IRF7,ISG15,SOCS3,STAT1
DIHYDROTESTOSTERONE	CHEMICAL - ENDOGENOUS MAMMALIAN		1.964	4.08x10-7	APOD,ATP2A2,CCNB1,CCND1,CCND2,CDKN1A,CLU,COL4A1,EIF4EBP1,FASN,FOXQ1,FTH1,GAS6,GSN,GTF2I,HMGCR,HSPA1A/HSPA1B,ID2,IGFBP5,IL6ST,IRS2,ITGB1,JAG1,LDLR,NUCB1,PAM,PDCD4,PHGDH,PMEPA1,POLDIP3,RAD23A,SCD,SERPINE2,SGK1,SHC1,SLC1A3,SLC3A2,SOD3,SORT1,SPP1,SQLE,TGFB2,VCAM1,ZEB1	365
2-BROMOETHYLAMINE	CHEMICAL REAGENT		1.964	1.76x10-3	CD14,CD44,CLU,LAMC2,LGALS3,PLA1A,SPP1
RAPGEF3	OTHER		1.964	5.11x10-3	BCL2L11,CYP1B1,SOCS3,SPP1	214
BROMOBENZENE	CHEMICAL TOXICANT		1.964	3.78x10-2	ABCC1,CDKN1A,FDFT1,FDPS,Gsta4,MSMO1
ENTEROTOXIN B	BIOLOGIC DRUG		1.964	2.6x10-1	CXCL12,CXCL2,IL33,SERPINA3
IFNB1	CYTOKINE		1.967	1.26x10-1	AXL,CD14,CDKN1A,CXCL2,HMGCR,IDI1,IFNAR1,IRF7,ISG15,PDK4,RND3,SQLE,STAT1,TRAF6
CYCLOPHOSPHAMIDE	CHEMICAL DRUG		1.969	1.71x10-2	CD44,CLU,LAMC2,LGALS3,PLA1A,SOX9,SPP1
ROSCOVITINE	CHEMICAL DRUG		1.969	5.49x10-2	CCNB1,CCND1,CDKN1A,RALA
GEFITINIB	CHEMICAL DRUG		1.972	1.21x10-1	BCL2L11,CCNB1,CCND1,FSCN1,IGFBP5,MMP11,NRP2,STAT1,TIMP3
FZD9	G-PROTEIN COUPLED RECEPTOR		1.98	2.74x10-3	IRF7,ISG15,SPRY4,STAT1
CYB5R4	ENZYME		1.98	5.11x10-3	EIF2S1,FASN,SCD,Scd2	127
TOMATIDINE	CHEMICAL - ENDOGENOUS NON-MAMMALIAN		1.982	1.82x10-4	EIF3C,EIF4EBP1,MARS,NARS
ACACB	ENZYME		1.982	2.15x10-3	FASN,HMGCR,MVD,SCD	146
PCYT1A	ENZYME		1.982	1.16x10-2	AXL,CXCL2,GSN,SCD
CPG ODN 1668	CHEMICAL REAGENT		1.982	1.36x10-1	IRF7,ISG15,SOCS3,STAT1
TLR3	TRANSMEMBRANE RECEPTOR		1.988	1.20x10-1	CLU,CXCL2,DUSP1,IFNAR1,IL33,IRF7,ISG15,N4BP1,PIK3R3,SERPINE1,SOCS3,STAT1,ZNFX1
IL12A	CYTOKINE		1.99	1.23x10-1	SOCS3,STAT1,STAT3,VCAM1
IL12B	CYTOKINE		1.99	1.49x10-1	SOCS3,STAT1,STAT3,VCAM1
BRCA1	TRANSCRIPTION REGULATOR		1.995	5.42x10-2	CCNB1,CCND1,CDKN1A,CYP1B1,FHL2,IFNAR1,IRF7,Ptprv,SAFB,SERPINE2,STAT1
25-HYDROXYCHOLESTEROL	CHEMICAL REAGENT		1.998	2.58x10-6	APOD,ASNS,CYP7A1,EIF2S1,FASN,FDFT1,FDPS,HMGCR,INSIG1,LDLR,PIK3R3,SCD	200
SOCS2	OTHER	Activated	2	1.25x10-3	FASN,MYOG,STAT3,STAT6	260
UPF1	ENZYME	Activated	2	8.58x10-3	Eif1,LBR,NRM,SGK1
LIPID	CHEMICAL - ENDOGENOUS MAMMALIAN	Activated	2	1.72x10-2	CLU,FDPS,HMGCR,LDLR
BMS-690514	CHEMICAL DRUG	Activated	2	2.99x10-2	BCL2L11,CCNB1,CCND1,HSPA4
TRAP1	ENZYME	Activated	2	3.29x10-2	ALDH1L2,MARS,MRPL18,MTHFD2
XANTHOHUMOL	CHEMICAL - ENDOGENOUS NON-MAMMALIAN	Activated	2	4.31x10-2	CCND1,FASN,SCD,TRAF6
LONP1	PEPTIDASE	Activated	2	8.91x10-2	ALDH1L2,ETFB,MARS,MRPL18,MTHFD2
BTNL2	TRANSMEMBRANE RECEPTOR	Activated	2	2.85x10-1	IFITM3,N4BP1,S100A4,XDH
IFNA2	CYTOKINE	Activated	2.01	8.19x10-2	ATF5,C1R,C1S,CD28,CDKN1A,IFITM3,IRF7,ISG15,KDM5A,MYRF,SDC1,SOCS3,STAT1
INHA	GROWTH FACTOR	Activated	2.013	4.31x10-3	CCND2,COL4A3BP,CYP1B1,CYP51A1,CYR61,INHBA,ITGA3,SERPINE1,SGK1,WISP1	86
PHENYLBUTAZONE	CHEMICAL DRUG	Activated	2.025	5.13x10-5	ASNS,CCND1,CD44,CDCP1,CLU,GSTM3,LAMC2,LGALS3,PLA1A,SPP1	147
FOXO3	TRANSCRIPTION REGULATOR	Activated	2.075	8.84x10-7	BCL2L11,BNIP2,BTG1,CCNB1,CCND1,CCND2,CDKN1A,CSNK2A2,CYR61,EIF4EBP1,FASN,FOXO4,GTF2I,HMGCR,INHBA,IRS2,JAG1,MTHFD2,MXD3,MXI1,RASA1,Rcan1,RTN4,SGK1,TGFB2,UCP2,ZWINT	288
CHUK	KINASE	Activated	2.084	3.85x10-3	CCNB1,CCND1,CDKN1A,CLU,CXCL12,CXCL2,ISG15,NID1,SERPINE2,SGK1,SOCS3,SOD3,SPP1,TIMP3,TNFRSF11B,VCAM1	261
SAMSN1	OTHER	Activated	2.111	4.25x10-4	CCND2,CXCL2,DAB2,INHBA,IRF7,ISG15,PLA1A,SDC1,SOCS3,STAT1,ZC3H12A	115
MGEA5	ENZYME	Activated	2.16	4.07x10-11	ACSS2,ADAM19,BNIP2,CAVIN2,CCND1,CD14,CD151,CD44,CD47,CDKN1A,CREB5,CYP4V2,DAB2,DHCR7,ELK1,FDFT1,FDPS,FLNA,FSCN1,GAS6,GSN,HIPK2,HMGCR,IGFBP5,IL6ST,LSS,MMP14,MSMO1,NOTCH2,NSDHL,OGDH,PRKAR1B,RASA3,Scd2,SERPINE2,SOCS3,SOX9,STAT1,TGFBI,TIMP3,TNFRSF11B,UXT	215
E. COLI SEROTYPE 0127B8 LIPOPOLYSACCHARIDE	CHEMICAL - ENDOGENOUS NON-MAMMALIAN	Activated	2.168	7.63x10-3	CD14,CXCL12,CXCL2,GJA5,JAK2,LAMC2,LGALS3,SLC4A2,SLC7A5,SOCS3,SOD3,STAT1,STAT3,TNFRSF11B	219
TNFSF10	CYTOKINE	Activated	2.183	2.86x10-1	CD14,FTH1,ISG15,STAT1,TAF6
IRF3	TRANSCRIPTION REGULATOR	Activated	2.185	4.11x10-1	ADAR,ANXA4,IFITM3,IRF7,ISG15,RASA1,STAT1,TIMP3
CEBPD	TRANSCRIPTION REGULATOR	Activated	2.201	1.38x10-1	ASNS,CCNB1,CCND1,CD14,CLU,IGFBP5
MAP3K7	KINASE	Activated	2.213	8.48x10-2	FASN,ISG15,MVK,SCD,VCAM1
FDFT1	ENZYME	Activated	2.219	3.47x10-4	CYP7A1,FASN,FDPS,HMGCR,SQLE
JAK1	KINASE	Activated	2.219	1.07x10-3	BCL2L11,CD14,CDKN1A,IL6ST,IRF7,SLC1A3,SOCS3,STAT1	308
IRF5	TRANSCRIPTION REGULATOR	Activated	2.219	4.77x10-2	CDKN1A,CXCL2,IFITM3,IRF7,ISG15,STAT1
OSM	CYTOKINE	Activated	2.224	1.50x10-8	ABCC1,AKR1C3,ASAH1,ASNS,BLMH,C1R,C1S,CCND1,CCND2,CDKN1A,CSNK2A2,CXADR,CXCL12,CXCL2,CYP1B1,EIF4EBP1,ETFB,ETS2,FASN,ID2,IL33,IL6ST,IRF7,JAG1,LDLR,MYCBP2,OGDH,PDCD4,PDLIM5,RAB31,RAD23A,RBFOX2,RORA,SERPINA3,SERPINB1,SERPINE1,SNAPC3,SOCS3,STAT1,STAT3,SYNE1,TIMP3,TM7SF2,TNFRSF11B,UBQLN2,VCAM1,XDH	296
TET2	ENZYME	Activated	2.236	4.00x10-1	BCL2L11,IFITM3,MTSS1,RND3,SLC6A8
STAT4	TRANSCRIPTION REGULATOR	Activated	2.245	1.32x10-3	ATP7A,BCL2L11,BSG,CCNL2,CXCL2,DAP,ERRFI1,FDX1,FSCN1,ISG15,NSD3,RORA,S100A4,SERPINB1,SERPINE1,SF3B1,SOCS3,STAT1	270
STEROL	CHEMICAL - ENDOGENOUS MAMMALIAN	Activated	2.27	3.65x10-7	ACSS2,CYP7A1,DHCR7,FASN,FDFT1,FDPS,HMGCR,LDLR,Scd2	174
PTEN	PHOSPHATASE	Activated	2.293	9.06x10-13	AKR1C3,ARHGAP5,BCL2L11,BTG1,CCNB1,CCND1,CDKN1A,CSTF3,CXCL2,DUSP1,DYRK1A,EIF4EBP1,ETS2,FASN,FDFT1,GJA5,GTF2I,HMGCR,HSPA1A/HSPA1B,IDI1,IFRD1,IFT27,IGFBP5,INPPL1,IRS2,ISG15,JAG1,KLF6,LGALS3,MMP14,MVD,PAPOLA,PDCD4,PSCA,PXN,RBBP6,RBMS2,RETREG3,SCD,SDC1,SERPINE1,SMAD6,SMARCA4,SOCS3,SOX4,SPP1,STAT3,STEAP1,TNFRSF11B,TRAM1,VCAM1	274
INTERFERON ALPHA	GROUP	Activated	2.337	8.25x10-3	ADAM19,ADAR,AXL,CCND1,CCND2,CD81,CDKN1A,CXCL2,DAG1,DYNLT1,FASN,HSPA1A/HSPA1B,IFITM3,IFNAR1,IL6ST,IRF7,ISG15,ITGB1,NF2,SERPINB1,SOCS3,SPRY4,STAT1,STAT3,TBC1D10A,VCAM1	268
N-3 FATTY ACIDS	CHEMICAL DRUG	Activated	2.355	7.26x10-3	ELOVL6,FADS1,FASN,IRS2,SCD,SDC1	182
LIPOPOLYSACCHARIDE	CHEMICAL DRUG	Activated	2.361	2.94x10-5	ABCC1,ADAR,AKAP2,ATP2A2,BCL2L11,BSG,BTG1,CCNB1,CCND1,CCND2,CD14,CD28,CD44,CDKN1A,CNNM2,COL4A1,COL4A2,COX4I1,CXADR,CXCL12,CXCL2,CYP7A1,CYR61,DAG1,DDX6,DUSP1,ELK1,ERF,ETS2,FASN,FCGRT,FSCN1,FTH1,GJA5,GSN,HMGCR,HSPA1A/HSPA1B,ID2,ID3,IFRD1,IGFBP5,IL33,IL6ST,INHBA,INSIG1,IRF7,ISG15,ITGA3,ITGB1,JAG1,JAK2,KLF6,LGALS3,MMP14,NFAT5,NID1,NOTCH2,PDCD4,PDK4,PLA2G2A,PRKCA,PSMB4,REXO1,RND3,Scd2,SDC1,SERPINA3,SER…	308
STAT1	TRANSCRIPTION REGULATOR	Activated	2.365	4.41x10-2	ALPK1,AXL,BCL2L11,BTG1,C1R,C1S,CCND1,CCND2,CD14,CDKN1A,CXCL2,IFITM3,IRF7,ISG15,JAK2,SERPINA3,SOCS3,STAT1,STAT3
TRICHOSTATIN A	CHEMICAL DRUG	Activated	2.371	1.56x10-4	AGRN,AKAP12,BCL2L11,BTG1,C8orf44-SGK3/SGK3,CCND1,CCND2,CD14,CD28,CD44,CDKN1A,CLU,COL6A3,CXADR,CXCL12,CYP1B1,DAG1,DUSP1,FASN,GSN,HMGCR,ID2,ID3,LDLR,MVK,NEFH,Nes,NIFK,NOTCH2,PMM2,RAD23B,RND3,SDC1,SGK1,SHC1,SMARCA4,TIMP3,UBE2H,VCAM1,ZEB1	281
CNTF	CYTOKINE	Activated	2.38	2.51x10-3	FASN,IL6ST,MYOG,SCD,SERPINA3,SLC18A3,SOCS3,STAT1,STAT3	246
IKBKB	KINASE	Activated	2.446	6.85x10-4	CBLB,CCND1,CD44,CDKN1A,CLU,CXCL12,CXCL2,CYP1B1,FASN,FSCN1,ISG15,NID1,S100A4,SERPINE2,SGK1,SOCS3,SOD3,STAT3,TIMP3,TNFRSF11B,VCAM1	259
ARSENIC TRIOXIDE	CHEMICAL DRUG	Activated	2.48	4.96x10-6	CCND1,CD44,CDKN1A,CYP51A1,DHCR7,FADS1,FASN,FDFT1,FDPS,FDX1,FTH1,HMGCR,IDI1,ITGB1,LSS,MSMO1,SCD,SQLE	335
TGFB1	GROWTH FACTOR	Activated	2.518	6.13x10-20	ACTN1,ADAM10,ADAM19,Akr1c19,ARNT2,ASNS,AXL,BCL2L11,BSG,BTG1,C1R,C1S,CAVIN2,CCNB1,CCND1,CCND2,CCT6A,CD14,CD28,CD44,CDKN1A,CFH,CFL1,CLU,CNN2,COL4A1,COL4A2,COL6A3,COTL1,CSRP2,CXADR,CXCL12,CXCL2,CYP7A1,CYR61,DAAM1,DAB2,DDR2,DNPEP,DPYSL3,DUSP1,ECE1,EIF4H,EPRS,ERF,FLNA,FNDC3B,FSCN1,FTH1,GGA3,GSE1,GSN,Gsta4,HAT1,HSPA1A/HSPA1B,ID2,ID3,IDI1,IFRD1,IGFBP5,IL33,INHBA,ITGA11,ITGA3,ITGA6,ITGB1,JAG1,KDM5B,KRT7,…	339
TRETINOIN	CHEMICAL - ENDOGENOUS MAMMALIAN	Activated	2.542	1.17x10-5	ACSS2,ADAM10,ADAR,AGO1,AKAP12,APOD,ASNS,ATP1B3,ATP2A2,BTG1,CCNB1,CCND1,CCND2,CCPG1,CD14,CD44,CD47,CD82,CDKN1A,CGGBP1,COL4A1,COL4A2,COTL1,CXCL2,CYP7A1,CYR61,DAB2,DPYSL3,DUSP1,ECE1,EIF3C,EIF4EBP1,EIF4EBP2,EIF4G1,ERRFI1,HPRT1,ID2,ID3,IGFBP5,IL6ST,INHBA,ISG15,ITGA6,ITGB1,JAK2,KRT7,MAG,MMP11,MMP14,MPP6,MTHFD2,MYOG,NEFH,NR2F2,PAM,PDCD4,PGD,PRKCA,PTGIS,RAD23B,RAE1,RALA,SCD,SDCBP,SERPINE1,SERPINE2,SLC12A…	334
PTH	OTHER	Activated	2.544	4.63x10-4	ATP2A2,CCND1,CDKN1A,CXCL12,CXCL2,DUSP1,GNG12,IGFBP5,IL33,PXN,SOCS3,SORT1,SPP1,TNFRSF11B,WISP2	283
IRF7	TRANSCRIPTION REGULATOR	Activated	2.594	3.79x10-1	ADAR,IFITM3,IL33,IRF7,ISG15,JAK2,STAT1
NPPB	OTHER	Activated	2.621	7.56x10-5	FDFT1,FDX1,HMGCR,IDI1,LDLR,LSS,MSMO1
CYP51A1	ENZYME	Activated	2.646	1.09x10-7	HMGCR,LSS,MSMO1,NSDHL,SC5D,SQLE,TM7SF2
2,4,5,2',4',5'-HEXACHLOROBIPHENYL	CHEMICAL TOXICANT	Activated	2.646	2.09x10-2	AKAP12,AOX1,ELOVL6,FASN,HMGCR,INSIG2,ZWINT
GENTAMICIN	CHEMICAL DRUG	Activated	2.707	2.70x10-1	CLU,CSRP2,HSPA1A/HSPA1B,IFRD1,IRF7,KLF6,PHGDH,PSAT1,SPP1,Tpm3,VCAM1
DECITABINE	CHEMICAL DRUG	Activated	2.724	1.57x10-6	ABCC1,AGRN,AKAP12,BCL2L11,BTG1,CCND1,CCND2,CD44,CDKN1A,CLU,COL6A3,CXCL12,CYP1B1,DUSP1,EPHB4,GSN,HMMR,HPRT1,HSPA1A/HSPA1B,IRF7,ISG15,ITGA3,JAG1,KLF6,KRT7,LDLR,LGALS3,MMP14,PXDN,SGK1,SHC1,SMARCA2,SOCS3,SPP1,STAT1,TFAP2A,TGFB2,TGFBI,TIMP3,Tpm3,UBA1	296
IFNAR1	TRANSMEMBRANE RECEPTOR	Activated	2.76	2.02x10-2	AXL,CXCL2,HMGCR,IDI1,IRF7,ISG15,SDC1,SOCS3,SQLE,STAT1
INSIG2	OTHER	Activated	2.764	1.41x10-8	ELOVL6,FASN,FDFT1,FDPS,HMGCR,INSIG1,LDLR,SCD	174
RIPK2	KINASE	Activated	2.764	3.60x10-3	CXCL2,CYP7A1,FASN,HMGCR,IL33,LDLR,SCD,VCAM1	288
SKIL	TRANSCRIPTION REGULATOR	Activated	2.779	2.23x10-5	CDKN1A,COL4A1,CXCL12,DIXDC1,MYOG,SERPINE1,SLC44A1,Tpm3,ZEB1	210
LMNB1	OTHER	Activated	2.804	2.07x10-9	CXCL12,CYP51A1,DHCR7,FASN,FSTL1,HMGCR,LDLR,MSMO1,PRRX2,SCD,SQLE,TGFB2,TGFBI,WISP2
PEX5L	ION CHANNEL	Activated	2.97	6.14x10-11	CYP7A1,DHCR7,FDFT1,FDPS,HMGCR,IDI1,LSS,MVK,PMVK
POLY RI:RC-RNA	BIOLOGIC DRUG	Activated	2.994	4.49x10-2	ADAM10,ADAR,AGRN,AXL,CD14,CD44,CD47,CXCL2,DUSP1,ETNK1,IFITM3,IRF7,ISG15,JAK2,KLF6,PRKAR1B,RC3H2,STAT1,TIPARP,TNFRSF11B,TRAF6,TRIM25,VCAM1
IFNG	CYTOKINE	Activated	3.098	1.58x10-5	AGRN,ARNT2,ASNS,ATG3,ATP1B1,ATP2A2,BCL2L11,BTG1,C1R,CCND1,CCND2,CD14,CD44,CDKN1A,CIRBP,CXADR,CXCL12,CXCL2,DDR2,DRG1,DUSP1,ECE1,ELK1,ETS2,FASN,FHL2,FTH1,GAS6,GJA5,HMGCR,HSPA1A/HSPA1B,IDI1,IFITM3,INHBA,IRF7,IRS2,ISG15,ITGA6,ITGB1,JAG1,JAK2,KARS,KLF6,LAMC2,LGALS3,MMP11,MTSS1,MYOG,NDRG4,PAM,PHGDH,PLA2G2A,PRKCA,RAB12,SBNO2,SDC1,SERPINE1,SLC12A2,SLC1A3,SLC4A2,SLC7A5,SMTN,SOCS3,SOD3,SPP1,SQLE,STAT1,STAT…	257
IKBKG	KINASE	Activated	3.24	5.90x10-3	ATP2A2,CLU,CXCL12,CXCL2,IRF7,ISG15,NID1,SERPINE2,SGK1,SOCS3,SOD3	265
CD28	TRANSMEMBRANE RECEPTOR	Activated	3.32	1.40x10-2	ACTR3,AP1B1,BTG1,CBL,CBLB,CCND1,CCND2,CXCL2,FDPS,FKBP2,HAT1,HSPA1A/HSPA1B,IGFBP5,PSMF1,RAD23B,RORA,SLC7A5,SOCS3,STAT3,STEAP2,STRN3
MAPK14	KINASE	Activated	3.376	7.84x10-4	CCNB1,CCND1,CYP51A1,CYP7A1,DUSP1,FASN,FDPS,HMGCR,LDLR,MYOG,SGK1,SHC1,SLC18A3,SOCS3,TNN,Tpm3	293
INSIG1	OTHER	Activated	3.627	1.04x10-11	ACSS2,CXCL2,CYP51A1,DHCR7,ELOVL6,FADS1,FASN,FDFT1,FDPS,HMGCR,IDI1,IRS2,LDLR,LSS,MVK,PMVK,SCD,Scd2,SQLE,STEAP2,TM7SF2,UCP2	200
POR	ENZYME	Activated	3.754	3.97x10-13	ASNS,ATF5,C11orf54,CYP39A1,CYP51A1,CYP7A1,DHCR7,ELOVL6,FDFT1,FDPS,HMGCR,HSD17B12,IDI1,INSIG1,LDLR,LSS,MSMO1,MVD,MVK,NSDHL,PDK4,PGD,PMVK,SC5D,SCD,Scd2,SERPINA3,SQLE,STAT1,TM7SF2,TMEM97	113
CHOLESTEROL	CHEMICAL - ENDOGENOUS MAMMALIAN	Activated	4.423	5.86x10-12	ABCA7,ACSS2,BSG,CD14,CXCL2,CYP7A1,DHCR7,FADS1,FASN,FDFT1,FDPS,HMGCR,IDI1,INHBA,LDLR,LGALS3,MMP14,MSMO1,NSDHL,PMVK,PSAT1,RPL36AL,SC5D,SCD,SLC1A3,SLC7A5,SOCS3,SQLE,TIMP3,TM7SF2,UXT,VCAM1	259
Mechanistic network represents number of downstream differential genes of the upstream regulator
